# Supplementary material for: An efficient copper-catalyzed synthesis of hexahydro-1H- phenothiazines
Source: Royal Society of Chemistry journal article supplement (doi:10.1039/b916664e), 2009-01-01
Supplement: b916664e.pdf [file b916664e.pdf]

Supplementary data

**An Efficient Copper Catalyzed Synthesis of  
Hexahydro-1*H*-phenothiazines**

**D. J. C. Prasad, and G.Sekar\***

Department of Chemistry, Indian Institute of Technology Madras, Chennai,  
Tamil Nadu, India 600036.

*E-mail: [gsekar@iitm.ac.in](mailto:gsekar@iitm.ac.in)*

**Table of contents**

|                                                                |     |
|----------------------------------------------------------------|-----|
| • General Information                                          | S2  |
| • Typical Experimental Procedure                               | S2  |
| • Spectral data for the Products                               | S3  |
| • Synthesis of antihistamine agent <b>23</b>                   | S7  |
| • References                                                   | S8  |
| • Copies of <sup>1</sup> H NMR and <sup>13</sup> C NMR Spectra | S9  |
| • Single crystal XRD data                                      | S33 |

## General Information

All reactions were carried out in reaction tube under nitrogen atmosphere. Copper (I) iodide, ligands and *o*-halothiophenols were purchased from sigma Aldrich Chemical Company. K<sub>2</sub>CO<sub>3</sub> was purchased from Spectrochem. India, Private Limited and used without further purification. The aziridines, 2-iodothiophenol and 4-methyl 2-bromothiophenol were made using literature procedures.<sup>1</sup> 1, 4-Dioxane was dried over sodium wires, freshly distilled and used for reactions. Reaction temperatures were controlled by Varivolt temperature modulator, Thin-layer chromatography (TLC) was performed using Merck silica gel 60 F<sub>254</sub> precoated plates (0.25 mm) and visualized by UV fluorescence quenching. Silica gel (particle size 100-200 mesh) purchased from SRL India was used for chromatography. <sup>1</sup>H and <sup>13</sup>C NMR spectra were recorded on a Bruker 400 MHz instrument. <sup>1</sup>H NMR spectra were reported relative to Me<sub>4</sub>Si (δ 0.0 ppm) or residual CHCl<sub>3</sub> (δ 7.26 ppm). <sup>13</sup>C NMR were reported relative to CDCl<sub>3</sub> (δ 77.16 ppm). FTIR spectra were recorded on a Nicolet 6700 spectrometer and are reported in frequency of absorption (cm<sup>-1</sup>). High resolution mass spectra (HRMS) were recorded on Q-Tof Micro mass spectrometer.

### Typical experimental procedure for the domino aziridine ring opening/Goldberg cyclization reaction

K<sub>2</sub>CO<sub>3</sub> (138.2 mg, 1 mmol), CuI (2.4 mg, 0.0125 mmol) and aziridine (125.5 mg, 0.5 mmol) were taken in a 10 mL reaction tube equipped with a septum. The reaction tube was evacuated and back-filled with nitrogen. Then 1,4-Dioxane(1.5 mL), **L6** (1.7μL 0.025 mmol) and *o*-bromothiophenol (104.0 mg, 0.55 mmol) was added to the reaction mixture at room temperature. The reaction tube was sealed with glass stopper and reaction mixture was heated for 17 hours at 100 °C. After complete disappearance of starting materials (the progress of the reaction was followed by TLC), the reaction mixture was allowed to cool to room temperature and the crude reaction mixture was directly purified by column chromatography on silica gel using ethyl acetate/hexanes as the eluents to afford (±)-*trans*-(4a,10a)-10-Tosyl-2,3,4,4a,10,10a-hexahydro-1*H*-phenothiazine 174 mg (97%). (Table 2, entry 6).

## Spectral Data for the Products

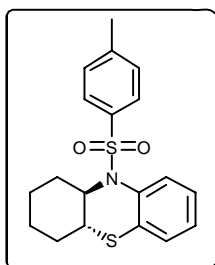

**(±)-trans-(4a,10a)-10-Tosyl-2,3,4,4a,10,10a-hexahydro-1H-phenothiazine:** (compound **9**): White solid, mp 116-118 °C,  $R_f$  0.45 (1:9 ethyl acetate : hexanes);  $^1\text{H}$  NMR (400 MHz,  $\text{CDCl}_3$ ):  $\delta$  1.15-1.30 (m, 1H), 1.37-1.46 (m, 1H), 1.46-1.58 (m, 2H), 1.73-1.86 (m, 2H), 2.00-2.08 (m, 1H), 2.35 (s, 3H), 2.45 (ddd,  $J = 11.6, 11.6$  and  $3.2$  Hz, 1H), 2.54-2.61 (m, 1H), 3.87 (ddd,  $J = 10.8, 11.0$  and  $3.6$  Hz, 1H), 7.05-7.13 (m, 4H), 7.18-7.25 (m, 3H), 7.74 (d,  $J = 8.4$  Hz, 1H);  $^{13}\text{C}$  NMR (100 MHz,  $\text{CDCl}_3$ ):  $\delta$  21.7, 24.9, 25.7, 31.8, 36.4, 51.9, 70.4, 126.3, 126.7, 127.5, 129.0, 129.5, 130.5, 134.8, 135.7, 136.2, 143.5; IR (neat): 3058, 2925, 2855, 1364, 1166, 849, 812  $\text{cm}^{-1}$ ; HRMS ( $m/z$ ):  $[\text{MNa}]^+$  calcd. for  $\text{C}_{19}\text{H}_{21}\text{NO}_2\text{NaS}_2$ :

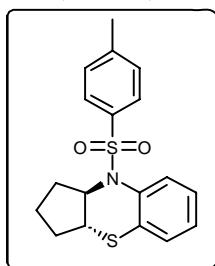

382.0911, found 382.0918.

**(±)-trans-(3a,9a)-9-Tosyl-1,2,3,3a,9,9a-hexahydrobenzo[b]cyclopenta[e][1,4]thiazine:** (compound **10**): White solid, mp 125-126 °C,  $R_f$  0.42 (1:9 ethyl acetate : hexanes);  $^1\text{H}$  NMR (400 MHz,  $\text{CDCl}_3$ ):  $\delta$  1.45-1.58 (m, 1H), 1.76- 1.89 (m, 1H), 1.89-2.02 (m, 3H), 2.36 (s, 3H), 2.39-2.50 (m, 1H), 2.92 (ddd,  $J = 11.3, 11.4$  and  $6.8$  Hz, 1H), 3.76 (ddd,  $J = 11.0, 11.0$  and  $7.2$  Hz, 1H), 6.99-7.09 (m, 2H), 7.09-7.19 (m, 3H), 7.25-7.31 (m, 2H), 7.80 (d,  $J = 8.0$  Hz, 1H);  $^{13}\text{C}$  NMR (100 MHz,  $\text{CDCl}_3$ ):  $\delta$  21.7, 21.8, 26.1, 31.3, 49.3, 71.2, 125.8, 126.0, 127.6, 129.1, 129.3, 129.8, 132.6, 134.6, 137.1, 143.8; IR (neat): 3057, 2959, 2877, 1353, 1166, 813, 727  $\text{cm}^{-1}$ ; HRMS ( $m/z$ ):  $[\text{MNa}]^+$  calcd. for  $\text{C}_{18}\text{H}_{19}\text{NO}_2\text{NaS}_2$ : 368.0755; found: 368.0755.

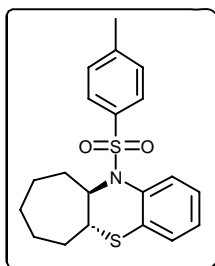

(±)-*trans*-(**5a,10a**)-**11**-tosyl-**5a,6,7,8,9,10,10a,11**-octahydrobenzo[*b*]cyclo

**hepta[*e*][1,4]thiazine:** (compound **11**): White solid, mp 104-106 °C,  $R_f$  0.50 (1:9 ethyl acetate : hexanes);  $^1\text{H}$  NMR (400 MHz,  $\text{CDCl}_3$ ):  $\delta$  1.41-1.79 (m, 8H), 1.86- 1.96 (m, 1H), 2.36 (s, 3H), 2.39-2.50 (m, 1H), 2.85 (ddd,  $J = 10.1, 10.2$  and  $3.2$  Hz, 1H), 4.43 (ddd,  $J = 10.1, 10.2$  and  $4.4$  Hz, 1H), 7.10 (d,  $J = 8.0$  Hz, 2H), 7.14-7.20 (m, 2H), 7.22-7.28 (m, 1H), 7.33 (d,  $J = 8.0$  Hz, 2H), 7.68 (d,  $J = 8.0$  Hz, 1H);  $^{13}\text{C}$  NMR (100 MHz,  $\text{CDCl}_3$ ):  $\delta$  21.7, 25.0, 25.1, 27.4, 32.9, 37.3, 52.2, 68.7, 127.1, 127.2, 127.4, 129.1, 129.3, 130.8, 135.9, 136.5, 136.5, 143.2; IR (neat): 3059, 2928, 2859, 1348, 1162, 812, 728  $\text{cm}^{-1}$ ; HRMS ( $m/z$ ):  $[\text{MNa}]^+$  calcd. for  $\text{C}_{20}\text{H}_{23}\text{NO}_2\text{NaS}_2$ : 396.1068; found: 396.1067.

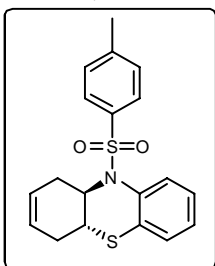

(±)-*trans*-(**4a,10a**)-**10**-tosyl-**4,4a,10,10a**-tetrahydro-**1H**-phenothiazine:

(compound **12**): White solid, mp 120-121 °C,  $R_f$  0.58 (1:19 ethyl acetate : hexanes);  $^1\text{H}$  NMR (400 MHz,  $\text{CDCl}_3$ ):  $\delta$  2.10-2.22 (m, 1H), 2.22-2.33 (m, 1H), 2.36 (s, 3H), 2.40-2.53 (m, 1H), 2.71 (ddd,  $J = 11.6, 11.6$  and  $5.2$  Hz, 1H), 2.89-2.99 (m, 1H), 4.13 (ddd,  $J = 11.0, 11.2$  and  $5.2$  Hz, 1H), 5.56-5.64 (m, 1H), 5.69-5.77 (m, 1H), 7.10 (d,  $J = 8.0$  Hz, 2H), 7.13-7.17 (m, 2H), 7.21-7.30 (m, 3H), 7.77 (d,  $J = 8.0$  Hz, 1H);  $^{13}\text{C}$  NMR (100 MHz,  $\text{CDCl}_3$ ):  $\delta$  21.7, 32.1, 36.0, 48.2, 65.8, 124.5, 126.7, 127.1, 127.5, 129.2, 129.7, 130.7, 135.2, 135.4, 135.8, 143.5; IR (neat): 3032, 2923, 2849, 1352, 1165, 812, 757  $\text{cm}^{-1}$ ; HRMS ( $m/z$ ):  $[\text{MH}]^+$  calcd. for  $\text{C}_{19}\text{H}_{20}\text{NO}_2\text{S}_2$ : 358.0935, found 358.0934.

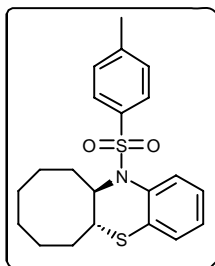

**(±)-trans-(5a,11a)-12-tosyl-6,7,8,9,10,11,11a,12-octahydro-5aH-benzo[*b*]**

**cycloocta[*e*][1,4]thiazine:** (compound **13**): White solid, mp 120-121 °C,  $R_f$  0.47 (1:9 ethyl acetate : hexanes);  $^1\text{H}$  NMR (400 MHz,  $\text{CDCl}_3$ ):  $\delta$  1.39-1.73 (m, 9H), 1.75- 1.88 (m, 2H), 2.09-2.21 (m, 1H), 2.36 (s, 3H), 3.15-3.23 (m, 1H), 4.72-4.82 (m, 1H), 7.13 (d,  $J = 8.4$  Hz, 2H), 7.15-7.29 (m, 3H), 7.41 (d,  $J = 8.4$  Hz, 2H), 7.63 (d,  $J = 7.6$  Hz, 1H);  $^{13}\text{C}$  NMR (100 MHz,  $\text{CDCl}_3$ ):  $\delta$  21.6, 22.3, 23.8, 26.5, 26.6, 35.2, 37.5, 51.2, 65.4, 127.3, 127.4, 127.4, 129.2, 129.2, 130.7, 135.7, 136.3, 137.3, 143.2; IR (neat): 3059, 2922, 2856, 1346, 1161, 812, 730  $\text{cm}^{-1}$ ; HRMS ( $m/z$ ):  $[\text{MH}]^+$  calcd. for  $\text{C}_{21}\text{H}_{26}\text{NO}_2\text{S}_2$ : 388.1405; found: 388.1407.

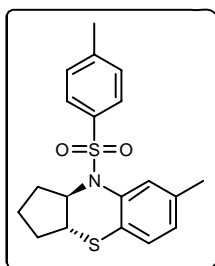

**(±)-trans-(3a,9a)-7-methyl-9-tosyl-1,2,3,3a,9,9a-**

**hexahydrobenzo[*b*]cyclo penta[*e*][1,4]thiazine:** (compound **14**): White solid, mp 158-159 °C,  $R_f$  0.52 (1:19 ethyl acetate : hexanes);  $^1\text{H}$  NMR (400 MHz,  $\text{CDCl}_3$ ):  $\delta$  1.43-1.57 (m, 1H), 1.72-1.84 (m, 1H), 1.87-1.99 (m, 3H), 2.35 (s, 3H), 2.36 (s, 3H), 2.39-2.47 (m, 1H), 2.87 (ddd,  $J = 11.4, 11.6$  and  $6.4$  Hz, 1H), 3.73 (ddd,  $J = 11.0, 11.2$  and  $6.8$  Hz, 1H), 6.85 (dd,  $J = 7.8$  and  $1.2$  Hz, 1H), 6.94 (d,  $J = 7.6$  Hz, 1H), 7.12 (d,  $J = 8.0$  Hz, 2H), 7.29 (d,  $J = 8.4$  Hz, 2H), 7.62 (s, 1H);  $^{13}\text{C}$  NMR (100 MHz,  $\text{CDCl}_3$ ):  $\delta$  21.2, 21.7, 21.7, 26.0, 31.3, 49.6, 71.3, 126.6, 127.6, 129.1, 129.3, 129.5, 129.7, 134.6, 136.1, 136.9, 143.7; IR (neat): 3054, 2923, 2877, 1352, 1166, 812, 728  $\text{cm}^{-1}$ ; HRMS ( $m/z$ ):  $[\text{MH}]^+$  calcd. for  $\text{C}_{19}\text{H}_{22}\text{NO}_2\text{S}_2$ : 360.1092; found: 360.1086.

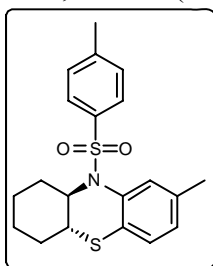

**(±)-trans-(4a,10a)-8-methyl-10-tosyl-2,3,4,4a,10,10a-hexahydro-1H-**

**phenothiazine:** (compound **15**): White solid, mp 121-122 °C,  $R_f$  0.63 (1:19 ethyl acetate : hexanes);  $^1\text{H}$  NMR (400 MHz,  $\text{CDCl}_3$ ):  $\delta$  1.16-1.64 (m, 4H), 1.72-1.88 (m, 2H), 1.97-2.08 (m, 1H), 2.35 (s, 3H), 2.37 (s, 3H), 2.39-2.45 (m, 1H), 2.52-2.60 (m, 1H), 3.79-3.88 (m, 1H), 6.92 (d,  $J = 8.0$  Hz, 1H), 6.97 (d,  $J = 7.6$  Hz, 1H), 7.08 (d,  $J = 8.0$  Hz, 2H), 7.23 (d,  $J = 8.0$  Hz, 2H), 7.57 (s, 1H);  $^{13}\text{C}$  NMR (100 MHz,  $\text{CDCl}_3$ ):  $\delta$  21.3, 21.6, 24.9, 25.7, 31.8, 36.3, 52.1, 70.2, 127.2,

127.6, 129.0, 129.2, 131.1, 132.6, 134.9, 135.4, 136.8, 143.4; IR (neat): 3056, 2934, 2859, 1349, 1165, 811, 730  $\text{cm}^{-1}$ ; HRMS ( $m/z$ ):  $[\text{MNa}]^+$  calcd. for  $\text{C}_{20}\text{H}_{23}\text{NO}_2\text{NaS}_2$ : 396.1068, found 396.1068.

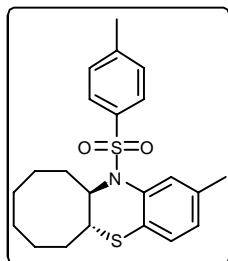

**(±)-trans-(5a,11a)-2-methyl-12-tosyl-6,7,8,9,10,11,11a,12-octahydro-5aH-benzo[b]cycloocta[e][1,4]thiazine:** (compound **16**): White solid, mp 115-116 °C,  $R_f$  0.43 (1:19 ethyl acetate : hexanes);  $^1\text{H}$  NMR (400 MHz,  $\text{CDCl}_3$ ):  $\delta$  1.40-1.72 (m, 9H), 1.73-1.86 (m, 2H), 2.07-2.18 (m, 1H), 2.37 (s, 6H), 3.11-3.19 (m, 1H), 4.69-4.78 (m, 1H), 6.99 (d,  $J = 7.6$  Hz, 1H), 7.09 (d,  $J = 7.6$  Hz, 1H), 7.13 (d,  $J = 8.0$  Hz, 2H), 7.43 (d,  $J = 8.4$  Hz, 2H), 7.45 (s, 1H);  $^{13}\text{C}$  NMR (100 MHz,  $\text{CDCl}_3$ ):  $\delta$  21.4, 21.7, 22.3, 23.8, 26.5, 26.6, 35.3, 37.5, 51.3, 65.3, 127.5, 128.3, 128.9, 129.2, 131.4, 132.1, 136.1, 137.4, 137.5, 143.1; IR (neat): 3059, 2923, 2857, 1346, 1163, 814, 706  $\text{cm}^{-1}$ ; HRMS ( $m/z$ ):  $[\text{MH}]^+$  calcd. for  $\text{C}_{22}\text{H}_{28}\text{NO}_2\text{S}_2$ : 402.1561, found 402.1557.

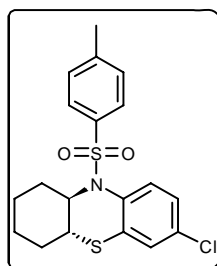

**(±)-trans-(4aR,10aR)-7-chloro-10-tosyl-2,3,4,4a,10,10a-hexahydro-1H-phenothiazine:** (compound **17**): White solid, mp 136-137 °C,  $R_f$  0.45 (1:19 ethyl acetate : hexanes);  $^1\text{H}$  NMR (400 MHz,  $\text{CDCl}_3$ ):  $\delta$  1.16-1.60 (m, 4H), 1.73-1.88 (m, 2H), 2.03 (d,  $J = 12.0$  Hz, 1H), 2.37 (s, 3H), 2.45 (ddd,  $J = 11.6, 11.6$  and  $2.4$  Hz, 1H), 2.57 (d,  $J = 10.0$  Hz, 1H), 3.80-3.90 (m, 1H), 7.09 (d,  $J = 2.0$  Hz, 1H), 7.12 (d,  $J = 8.0$  Hz, 2H), 7.19 (dd,  $J = 8.4$  and  $2.0$  Hz, 1H), 7.25 (d,  $J = 8.0$  Hz, 2H), 7.66 (d,  $J = 8.8$  Hz, 1H);  $^{13}\text{C}$  NMR (100 MHz,  $\text{CDCl}_3$ ):  $\delta$  21.7, 24.9, 25.7, 31.7, 36.3, 52.0, 70.2, 126.9, 127.5, 129.2, 129.2, 131.3, 131.9, 134.4, 134.6, 137.8, 143.8; IR (neat): 3060, 2934, 2857, 1354, 1165, 802, 706  $\text{cm}^{-1}$ ; HRMS ( $m/z$ ):  $[\text{MNa}]^+$  calcd. for  $\text{C}_{19}\text{H}_{20}\text{NO}_2\text{NaClS}_2$ : 416.0522, found 416.0523 .

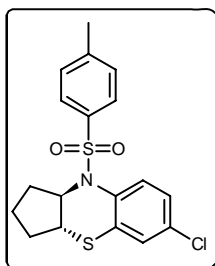

(±)-*trans*-(3a,9a)-6-chloro-9-tosyl-1,2,3,3a,9,9a-hexahydrobenzo[*b*]cyclo

*penta*[*e*][1,4]thiazine: (compound **18**): White solid, mp 176-178 °C,  $R_f$  0.41 (1:19 ethyl acetate : hexanes);  $^1\text{H}$  NMR (400 MHz,  $\text{CDCl}_3$ ):  $\delta$  1.44-1.58 (m, 1H), 1.76-1.88 (m, 1H), 1.88-2.02 (m, 3H), 2.38 (s, 3H), 2.40-2.48 (m, 1H), 2.85-2.97 (m, 1H), 3.68-3.77 (m, 1H), 7.04-7.07 (m, 1H), 7.08-7.14 (m, 1H), 7.17 (d,  $J = 7.2$  Hz, 2H), 7.26-7.36 (m, 2H), 7.72 (dd,  $J = 8.8$  and 2.0 Hz, 1H);  $^{13}\text{C}$  NMR (100 MHz,  $\text{CDCl}_3$ ):  $\delta$  21.7, 21.8, 26.1, 31.1, 49.0, 70.9, 126.1, 127.6, 129.2, 129.5, 130.0, 131.2, 134.3, 134.5, 135.8, 144.1; IR (neat): 3059, 2957, 2924, 2878, 1355, 1166, 1095, 817, 737  $\text{cm}^{-1}$ ; HRMS ( $m/z$ ):  $[\text{MH}]^+$  calcd. for  $\text{C}_{18}\text{H}_{19}\text{NO}_2\text{ClS}_2$ : 380.0546, found 380.0545.

### Synthesis of antihistamine agent **23**

Scheme 1

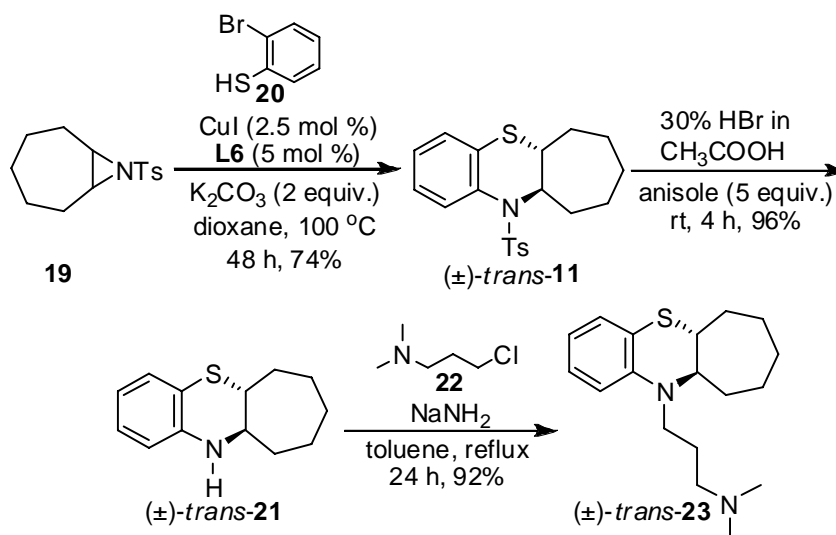

**Synthesis of 11** :  $\text{K}_2\text{CO}_3$  (2.764 g, 20.0 mmol), CuI (48.0 mg, 0.25 mmol) and aziridine **19** (2.65 g, 10.0 mmol) were taken in a 100 mL round bottom flask equipped with a septum. The round bottom flask was evacuated and back-filled with nitrogen. Then 1,4-Dioxane(25 mL), **L6** (30.1

mg, 0.50 mmol) and *o*-bromothiophenol **20** (2.08 g, 11.0 mmol) was added to the reaction mixture at room temperature. The reaction tube was sealed with glass stopper and reaction mixture was heated for 48 hours at 100 °C. After complete disappearance of starting materials (the progress of the reaction was monitored by TLC), the reaction mixture was allowed to cool to room temperature and the crude reaction mixture was directly purified by column chromatography on silica gel using ethyl acetate/hexanes as the eluents to afford (±)-*trans*-(5a,10a)-11-tosyl-5a,6,7,8,9,10,10a,11-octahydrobenzo[*b*]cyclo hepta[*e*][1,4]thiazine **11** (2.76 g, 74%) as White solid.

**Synthesis of 21 :** A mixture of **11** (1.49 g, 4.0 mmol) and anisole (2.16 g, 20.0 mmol) in 30% HBr in acetic acid (15 mL) was stirred for 4 h at room temperature and poured into ether (150 mL). Precipitates were filtered using Buckner funnel, the residue was suspended with 5% NaHCO<sub>3</sub> and extracted with CH<sub>2</sub>Cl<sub>2</sub>. The organic layer was dried over anhydrous Na<sub>2</sub>SO<sub>4</sub>, filtered, and concentrated to provide pure (±)-*trans*-5a,6,7,8,9,10,10a,11-octahydrobenzo[*e*]cyclo hepta[*b*][1,4]thiazine **21** (839 mg, 96%) as white solid, mp 106-108 °C, R<sub>f</sub> 0.65 (1:9 ethyl acetate : hexanes); <sup>1</sup>H NMR (400 MHz, CDCl<sub>3</sub>): δ 1.53-1.70 (m, 6H), 1.74-1.91 (m, 4H), 3.00-3.07 (m, 1H), 3.26 (ddd, *J* = 8.4, 8.6 and 3.6 Hz, 1H), 3.69 (s, 1H), 6.47 (dd, *J* = 8.0 and 0.8 Hz, 1H), 6.58-6.63 (m, 1H), 6.87 (td, *J* = 8.0 and 1.2 Hz, 1H), 6.98 (dd, *J* = 8.0 and 1.2 Hz, 1H); <sup>13</sup>C NMR (100 MHz, CDCl<sub>3</sub>): δ 23.1, 25.4, 27.0, 30.4, 35.8, 45.5, 59.9, 114.8, 118.1, 118.2, 125.3, 126.7, 142.0; IR (neat): 3363, 2926, 2838, 1019, 732 cm<sup>-1</sup>; HRMS (*m/z*): [MH]<sup>+</sup> calcd. for C<sub>13</sub>H<sub>18</sub>NS: 220.1160, found 220.1163.

**Synthesis of 23 :** In a reaction tube **21** (329 mg, 1.5 mmol) and sodamide (117 mg, 3.0 mmol) were taken, to this toluene (5 mL) was added. The reaction was stirred at reflux condition for 90 minutes, then freshly prepared 3-chloro-*N,N*-dimethylpropan-1-amine **22** (363 mg, 3.0 mmol) was added slowly. After complete disappearance of starting material (the progress of the reaction was followed by TLC), the reaction mixture was allowed to cool to room temperature and the crude reaction mixture was directly purified by column chromatography on silica gel (neutralized with Et<sub>3</sub>N) using ethyl acetate/hexanes as the eluents to afford (±)-*trans*-3-(6,7,8,9,10,10a-hexahydrobenzo[*e*]cyclo hepta[*b*][1,4]thiazin-11(5a*H*)-yl)-*N,N*-dimethylpropan-1-amine **23** (420 mg, 92%) as yellow color liquid<sup>2</sup>, R<sub>f</sub> 0.25 (1:9 ethyl acetate : hexanes, TLC plate neutralised with Et<sub>3</sub>N); <sup>1</sup>H NMR (400 MHz, CDCl<sub>3</sub>): δ 1.45-1.63 (m, 5H), 1.63-1.77 (m, 2H), 1.91-2.11 (m, 5H), 2.56 (s, 6H), 2.73-2.88 (m, 2H), 3.03-3.21 (m, 2H), 3.37-3.46 (m, 1H), 3.60-3.69 (m, 1H), 6.73



(d,  $J = 7.2$  Hz, 1H), 6.77 (d,  $J = 8.8$  Hz, 1H), 7.04-7.13 (m, 1H), 7.17-7.22 (m, 1H);  $^{13}\text{C}$  NMR (100 MHz,  $\text{CDCl}_3$ ):  $\delta$  22.0, 25.0, 25.5, 26.9, 31.3, 32.5, 43.1, 45.6, 51.7, 55.9, 69.3, 117.9, 119.8, 127.1, 128.9, 129.1, 144.5; IR (neat): 3049, 2924, 2855, 750  $\text{cm}^{-1}$ ; HRMS ( $m/z$ ):  $[\text{MNa}]^+$  calcd. for  $\text{C}_{18}\text{H}_{28}\text{N}_2\text{NaS}$ : 327.1871, found 327.1865.

## References

1. (a) V. V. Thakur and A. Sudalai, *Tetrahedron Lett.*, 2003, **44**, 989; (b) W.-J. Xiao and H. Alper, *J. Org. Chem.*, 1999, **64**, 9646; (c) K. C. Majumdar, P. Debnath, A. K. Pal, S. K. Chattopadhyay and A. Biswas, *Can. J. Chem.* 2007, **85**, 445.
2. F. M. Moracci, F. Liberatore, F. Micheletti, G. Liso and M. Cardellini, *J. Med. Chem.*, 1974, **17**, 463.

## Copies of $^1\text{H}$ NMR and $^{13}\text{C}$ NMR Spectra

djn-11-35  
 PROTON(-5to15)\_iitm\_bbo

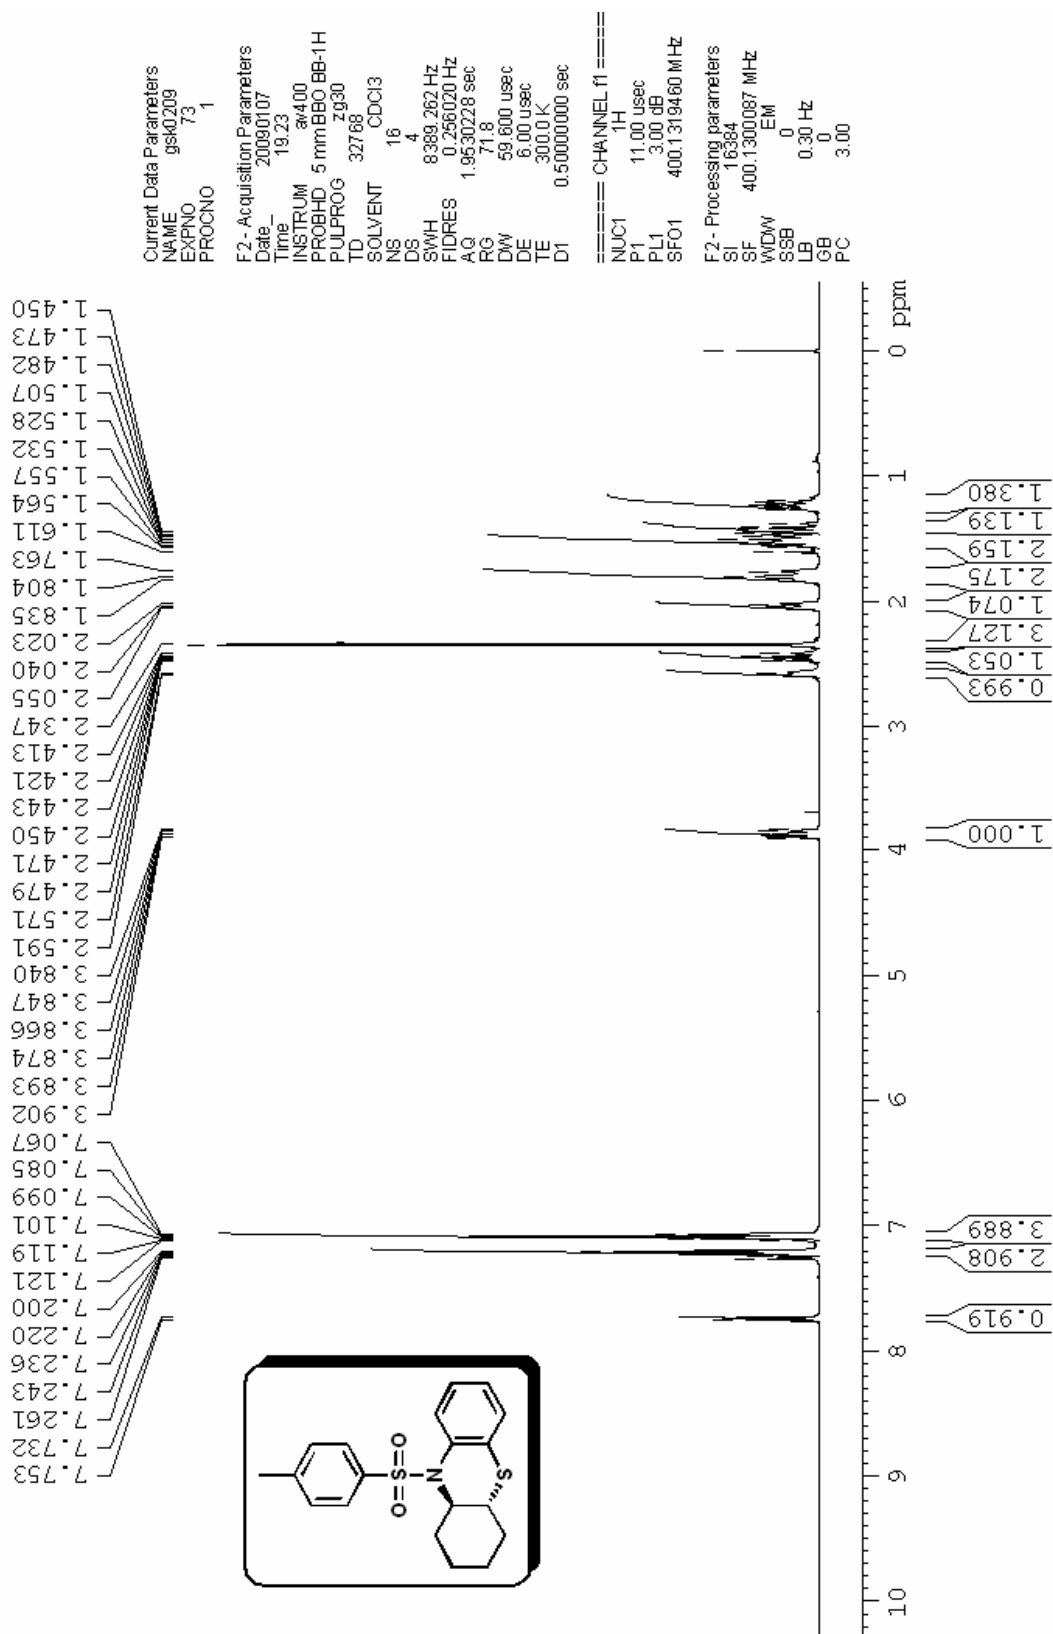

Current Data Parameters  
 NAME gsk0109  
 EXPNO 84  
 PROCNO 1

F2 - Acquisition Parameters  
 Date 20090107  
 Time 19.25  
 INSTRUM av400  
 PROBHD 5 mm BBO BB-1H  
 PULPROG zgpg30  
 TD 16384  
 SOLVENT CDCl3  
 NS 50  
 DS 4

SWH 25125.629 Hz  
 FIDRES 1.533547 Hz  
 AQ 0.3260916 sec  
 RG 1149.4  
 DW 19.900 usec  
 DE 6.00 usec  
 TE 300.0 K  
 D1 1.00000000 sec  
 d11 0.03000000 sec  
 d12 0.00002000 sec

==== CHANNEL f1 =====  
 NUC1 13C  
 P1 11.00 usec  
 PL1 0.00 dB  
 SFO1 100.6238364 MHz

==== CHANNEL f2 =====  
 CPDPRG2 waltz16  
 NUC2 1H  
 PCPD2 80.00 usec  
 PL2 3.00 dB  
 PL12 20.23 dB  
 PL13 23.23 dB  
 SFO2 400.1320007 MHz

F2 - Processing parameters  
 SI 131072  
 SF 100.6127583 MHz  
 WDW EM  
 SSB 0  
 LB 1.00 Hz  
 GB 0  
 PC 1.40

1D NMR plot parameters  
 CX 20.00 cm  
 CY 3.50 cm  
 F1P 234.849 ppm  
 F1 23628.84 Hz  
 F2P -14.877 ppm  
 F2 -1496.79 Hz  
 PPMCM 12.48630 ppm/cm  
 HZCM 1256.28125 Hz/cm

djn-11-35  
 CARBONSHORT\_iitm\_bbo

143.474  
 136.154  
 135.690  
 134.782  
 130.463  
 129.543  
 129.047  
 127.545  
 126.745  
 126.338  
 77.481  
 77.164  
 76.846  
 70.389  
 51.954  
 36.399  
 31.826  
 25.714  
 24.937  
 21.674

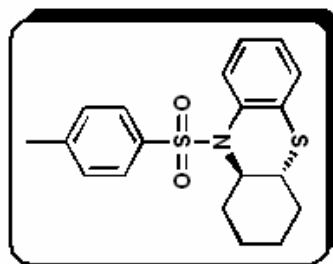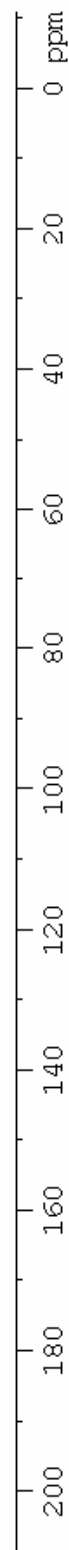

djn-ii-46  
 PROTON(-5to15)\_iitm\_bbo

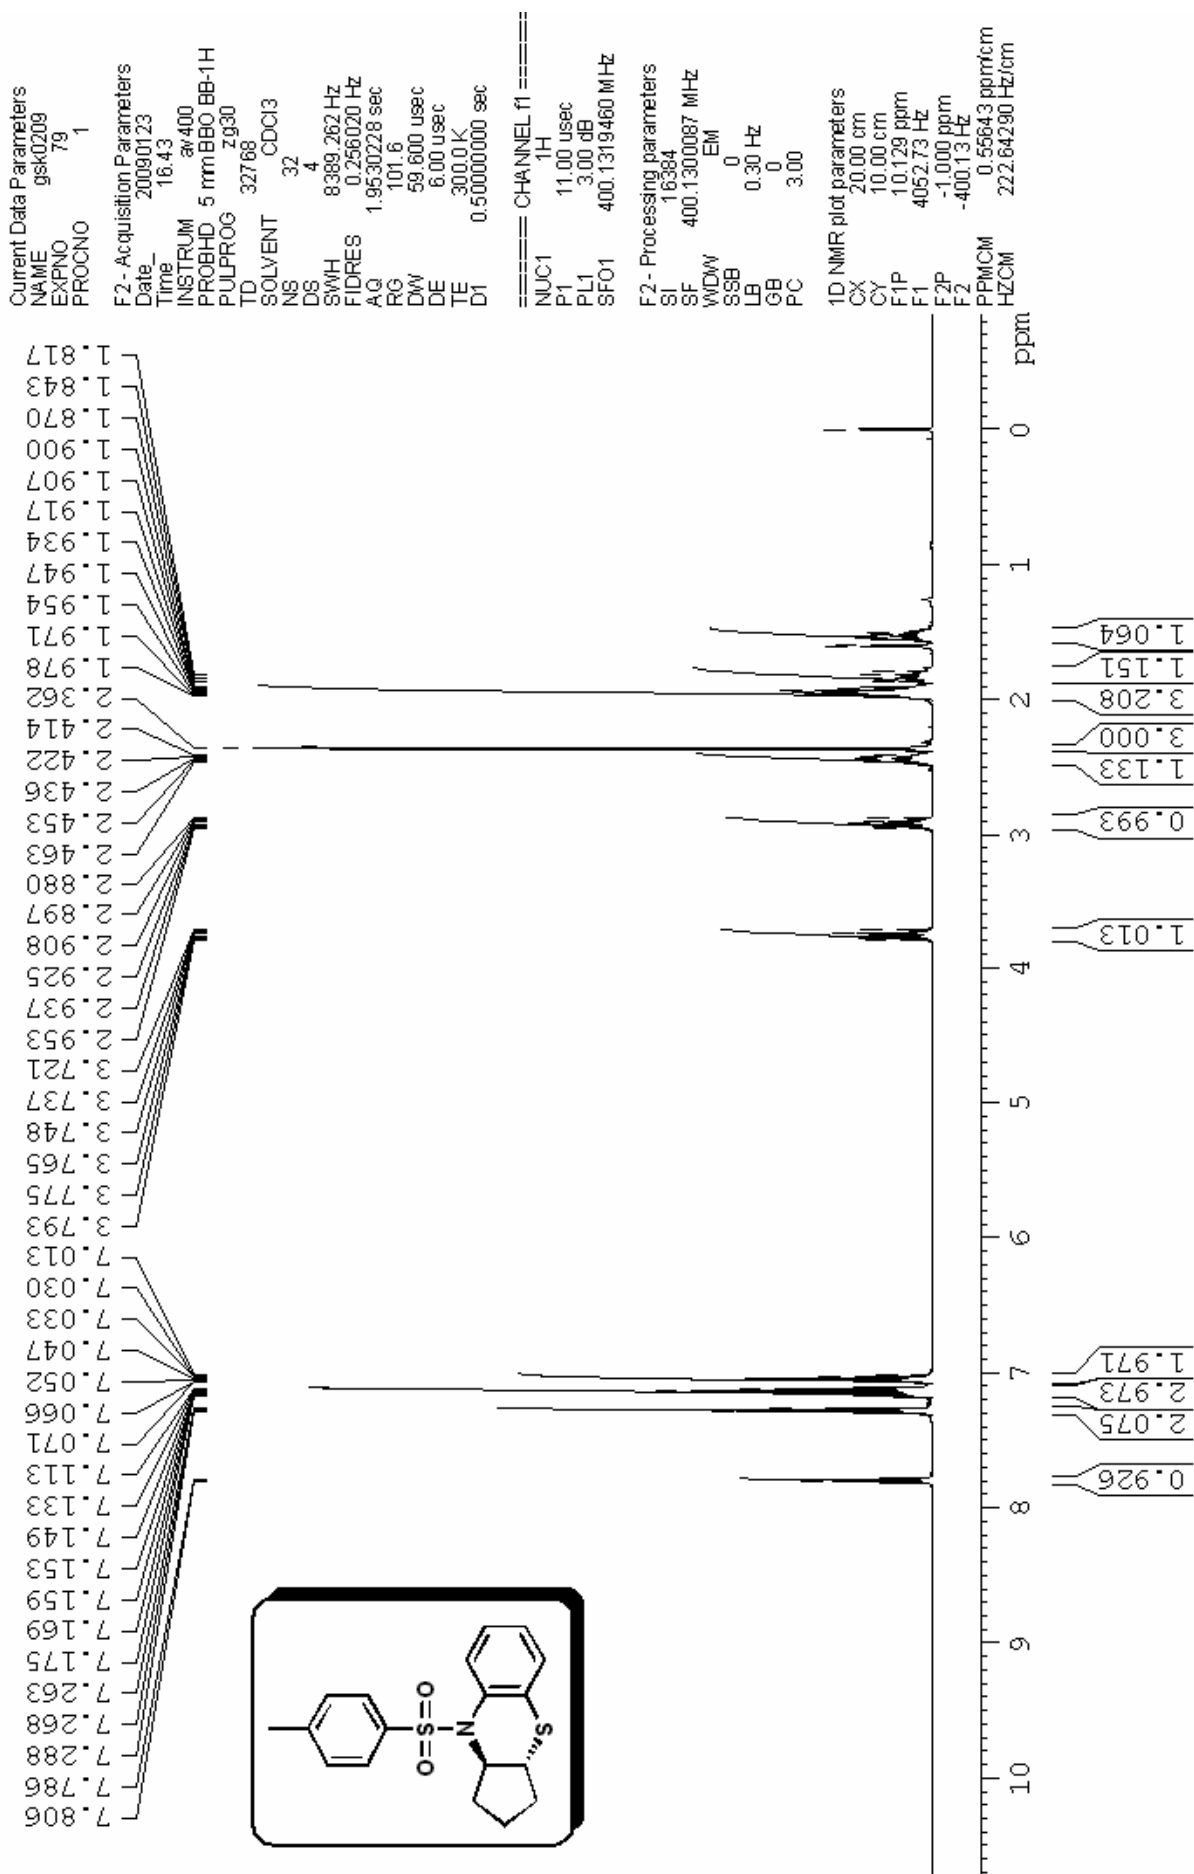

Current Data Parameters  
 NAME gsk0109  
 EXPNO ZZ1  
 PROCNO 1

F2 - Acquisition Parameters  
 Date\_ 20090128  
 Time\_ 10.26  
 NSTRUM av400  
 PROBHD 5 mm BBO BB-1H  
 PULPROG zgpg30  
 TD 16384  
 SOLVENT CDCl3  
 NS 100  
 DS 4  
 SWH 25125.629 Hz  
 FIDRES 1.533547 Hz  
 AQ 0.3260916 sec  
 RG 1149.4  
 SW 19.900 usec  
 DE 6.00 usec  
 TE 300.0 K  
 D1 1.00000000 sec  
 d11 0.03000000 sec  
 d12 0.00002000 sec

==== CHANNEL f1 ====  
 NUC1 13C  
 P1 11.00 usec  
 PL1 0.00 dB  
 SFO1 100.6238364 MHz  
 ==== CHANNEL f2 ====  
 CPDPRG2 waltz16  
 NUC2 1H  
 P2 80.00 usec  
 PL2 3.00 dB  
 PL12 20.23 dB  
 PL13 23.23 dB  
 SFO2 400.1320007 MHz

F2 - Processing parameters  
 SI 131072  
 SF 100.6127572 MHz  
 ADW EM  
 SSB 0  
 B 1.00 Hz  
 GB 0  
 GC 1.40

ID NMR plot parameters  
 CX 20.00 cm  
 CY 9.94 cm  
 ZP 234.849 ppm  
 F1 23628.84 Hz  
 F2 -14.877 ppm  
 FZ 12.48630 ppm  
 FZCM 1256.28125 Hz/cr

djn-ii-46  
 CARBONSHORT\_iitm\_bbo

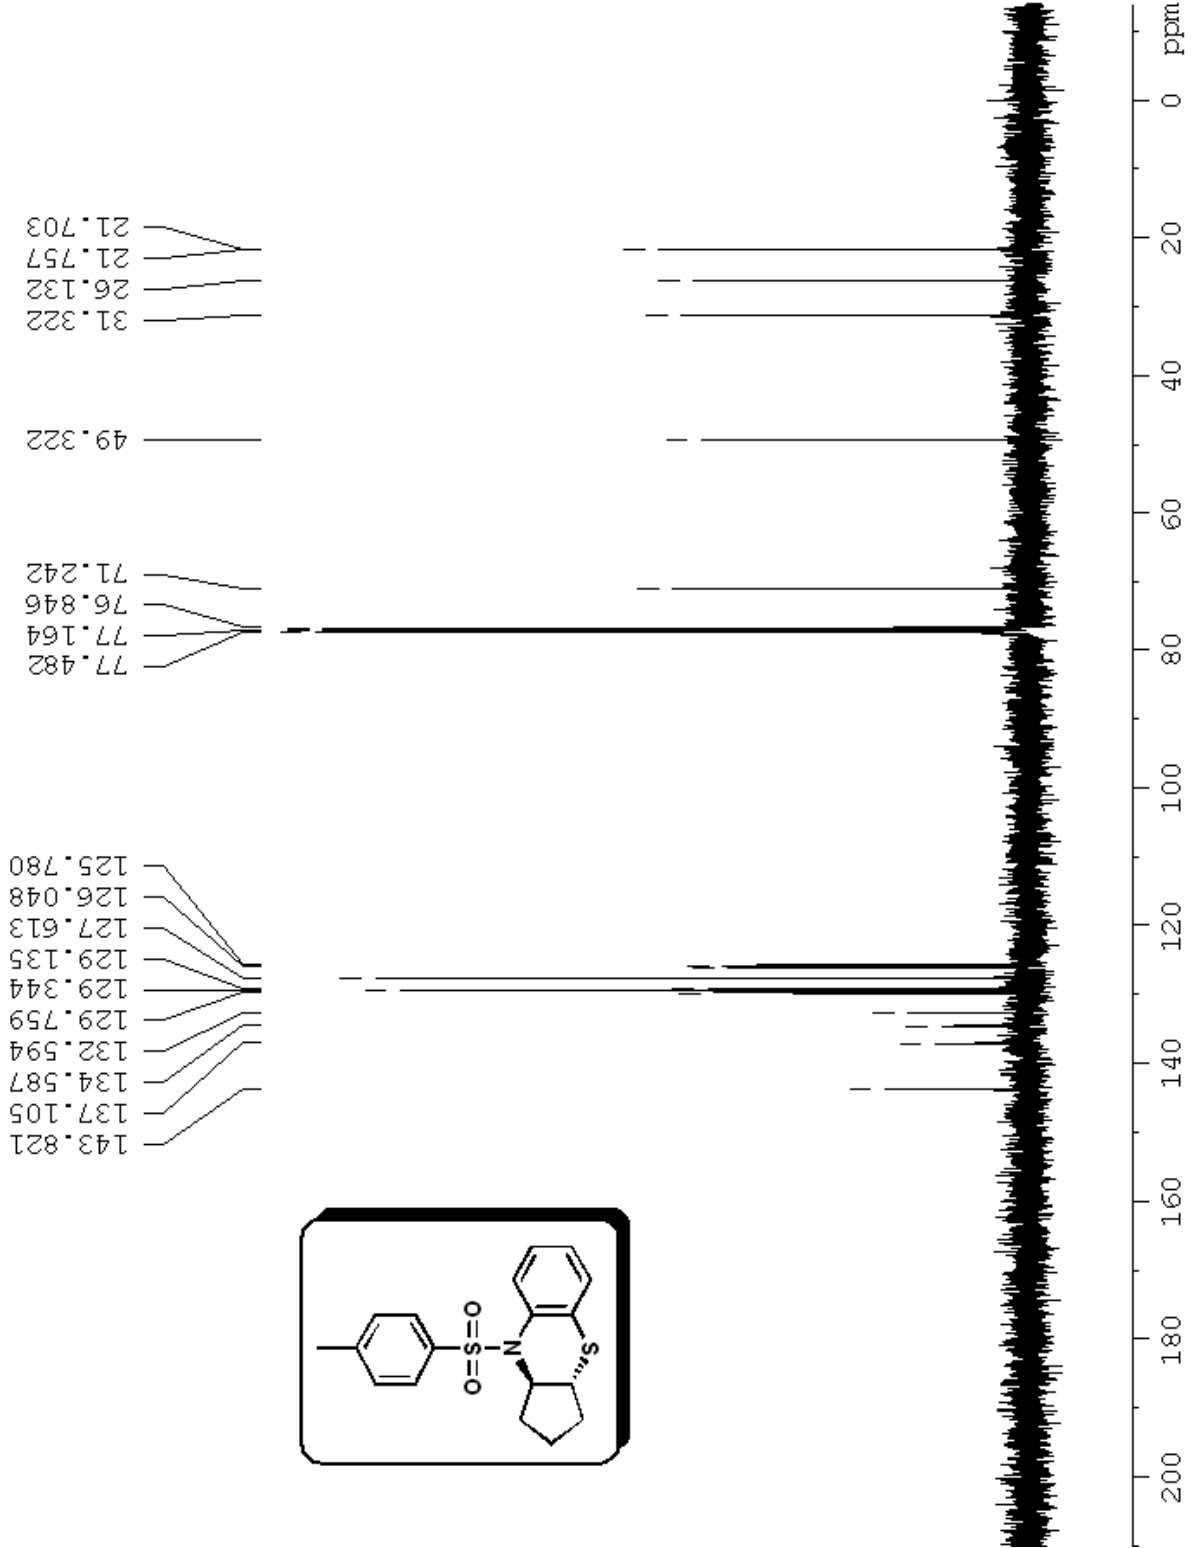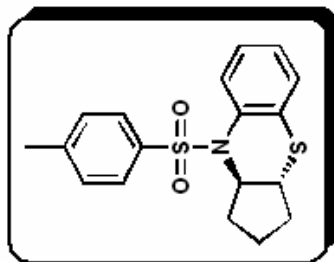

djn-ii-45  
 PROTON(-5to15)\_iitm\_bbo

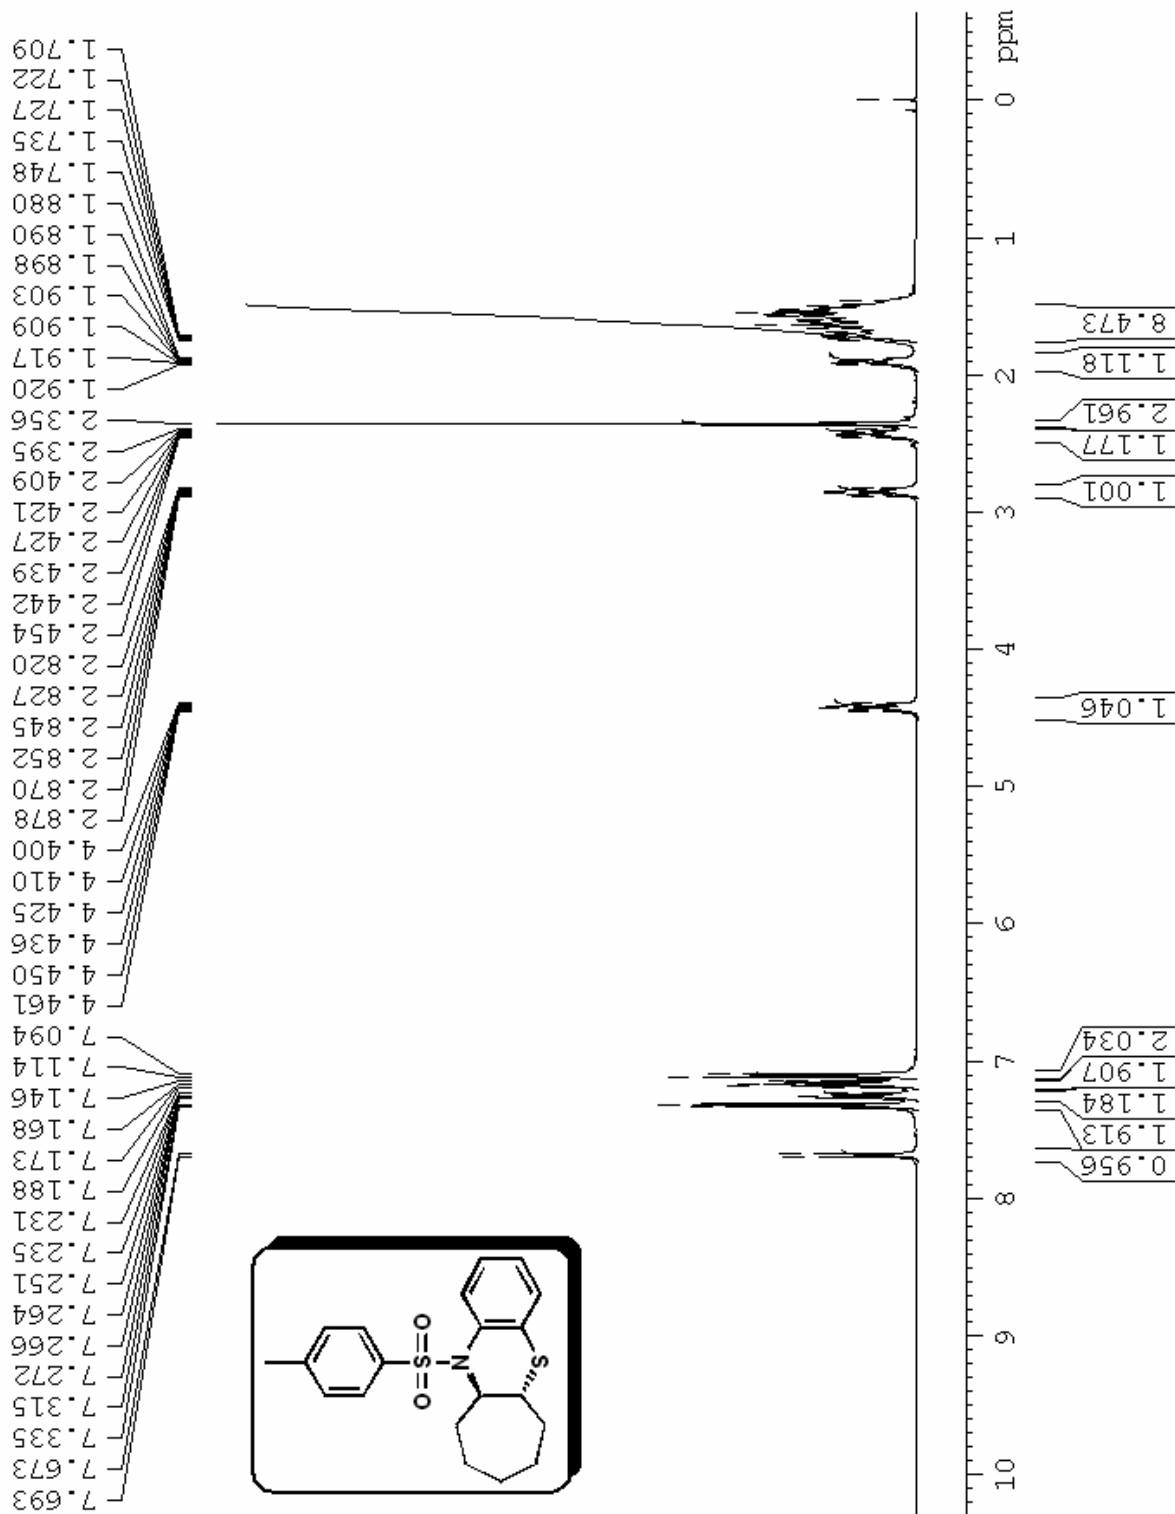

Current Data Parameters  
 NAME gsk0209  
 EXPNO 77  
 PROCNO 1

F2 - Acquisition Parameters  
 Date\_ 20090123  
 Time 16.32

INSTRUM av400  
 PROBHD 5 mm BBO BB-1H  
 PULPROG zg30

TD 32768  
 SOLVENT CDCl3

NS 32  
 DS 4

SWH 8389.262 Hz  
 FIDRES 0.256020 Hz

AQ 1.9530228 sec  
 RG 64

DW 59.600 usec  
 DE 6.00 usec

TE 300.0 K  
 D1 0.50000000 sec

==== CHANNEL f1 =====  
 NUC1 1H

P1 11.00 usec  
 PL1 3.00 dB

SFO1 400.1319460 MHz

F2 - Processing parameters  
 SI 16384

SF 400.1300082 MHz  
 WDW EM

SSB 0  
 LB 0.30 Hz

GB 0  
 PC 3.00

1D NMR plot parameters  
 CX 20.00 cm

CY 10.00 cm  
 F1 10.129 ppm

F2 4052.73 Hz  
 F2P -1.000 ppm

F2 -400.13 Hz  
 PPMCM 0.56643 ppm/cm

HZCM 222.64290 Hz/cm

djn-ii45  
CARBONSHORT\_iitm\_bbo

Current Data Parameters  
NAME gsk0109  
EXPNO 196  
PROCNO 1

F2 - Acquisition Parameters  
Date\_ 20090123  
Time\_ 16.34  
INSTRUM av400  
PROBHD 5 mmBBO BB-1H  
PULPROG zgpg30  
TD 16384  
SOLVENT CDCl3  
NS 152  
DS 4  
SWH 25125.629 Hz  
FIDRES 1.533547 Hz  
AQ 0.3260916 sec  
RG 1149.4  
DW 19.900 usec  
DE 6.00 usec  
TE 300.0 K  
D1 1.00000000 sec  
dfl 0.03000000 sec  
dfl2 0.00002000 sec

==== CHANNEL f1 =====  
NUC1 13C  
P1 11.00 usec  
PL1 0.00 dB  
SFO1 100.6238364 MHz

==== CHANNEL f2 =====  
CPDPRG2 waltz16  
NUC2 1H  
PCPD2 80.00 usec  
PL2 3.00 dB  
PL12 20.23 dB  
PL13 23.23 dB  
SFO2 400.1320007 MHz

F2 - Processing parameters  
SI 137072  
SF 100.6127583 MHz  
WDW EM  
SSB 0  
LB 1.00 Hz  
GB 0  
PC 1.40

1D NMR plot parameters  
CX 20.00 cm  
CY 9.94 cm  
FIP 234.849 ppm  
F1 236.2884 Hz  
F2P -14.877 ppm  
F2 -1496.79 Hz  
PPMCM 12.48630 ppm/cm  
HZCM 1256.28125 Hz/cm

143.224  
136.540  
136.504  
135.960  
130.755  
129.348  
129.116  
127.413  
127.221  
127.079  
77.478  
77.161  
76.843  
68.704  
52.207  
37.300  
32.950  
27.442  
25.092  
24.998  
21.662

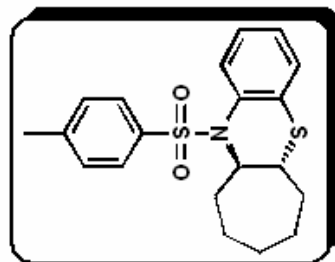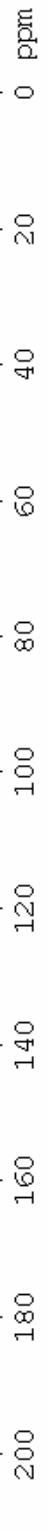

djn-ii-44  
 PROTON(-5to15)\_iitm\_bbo

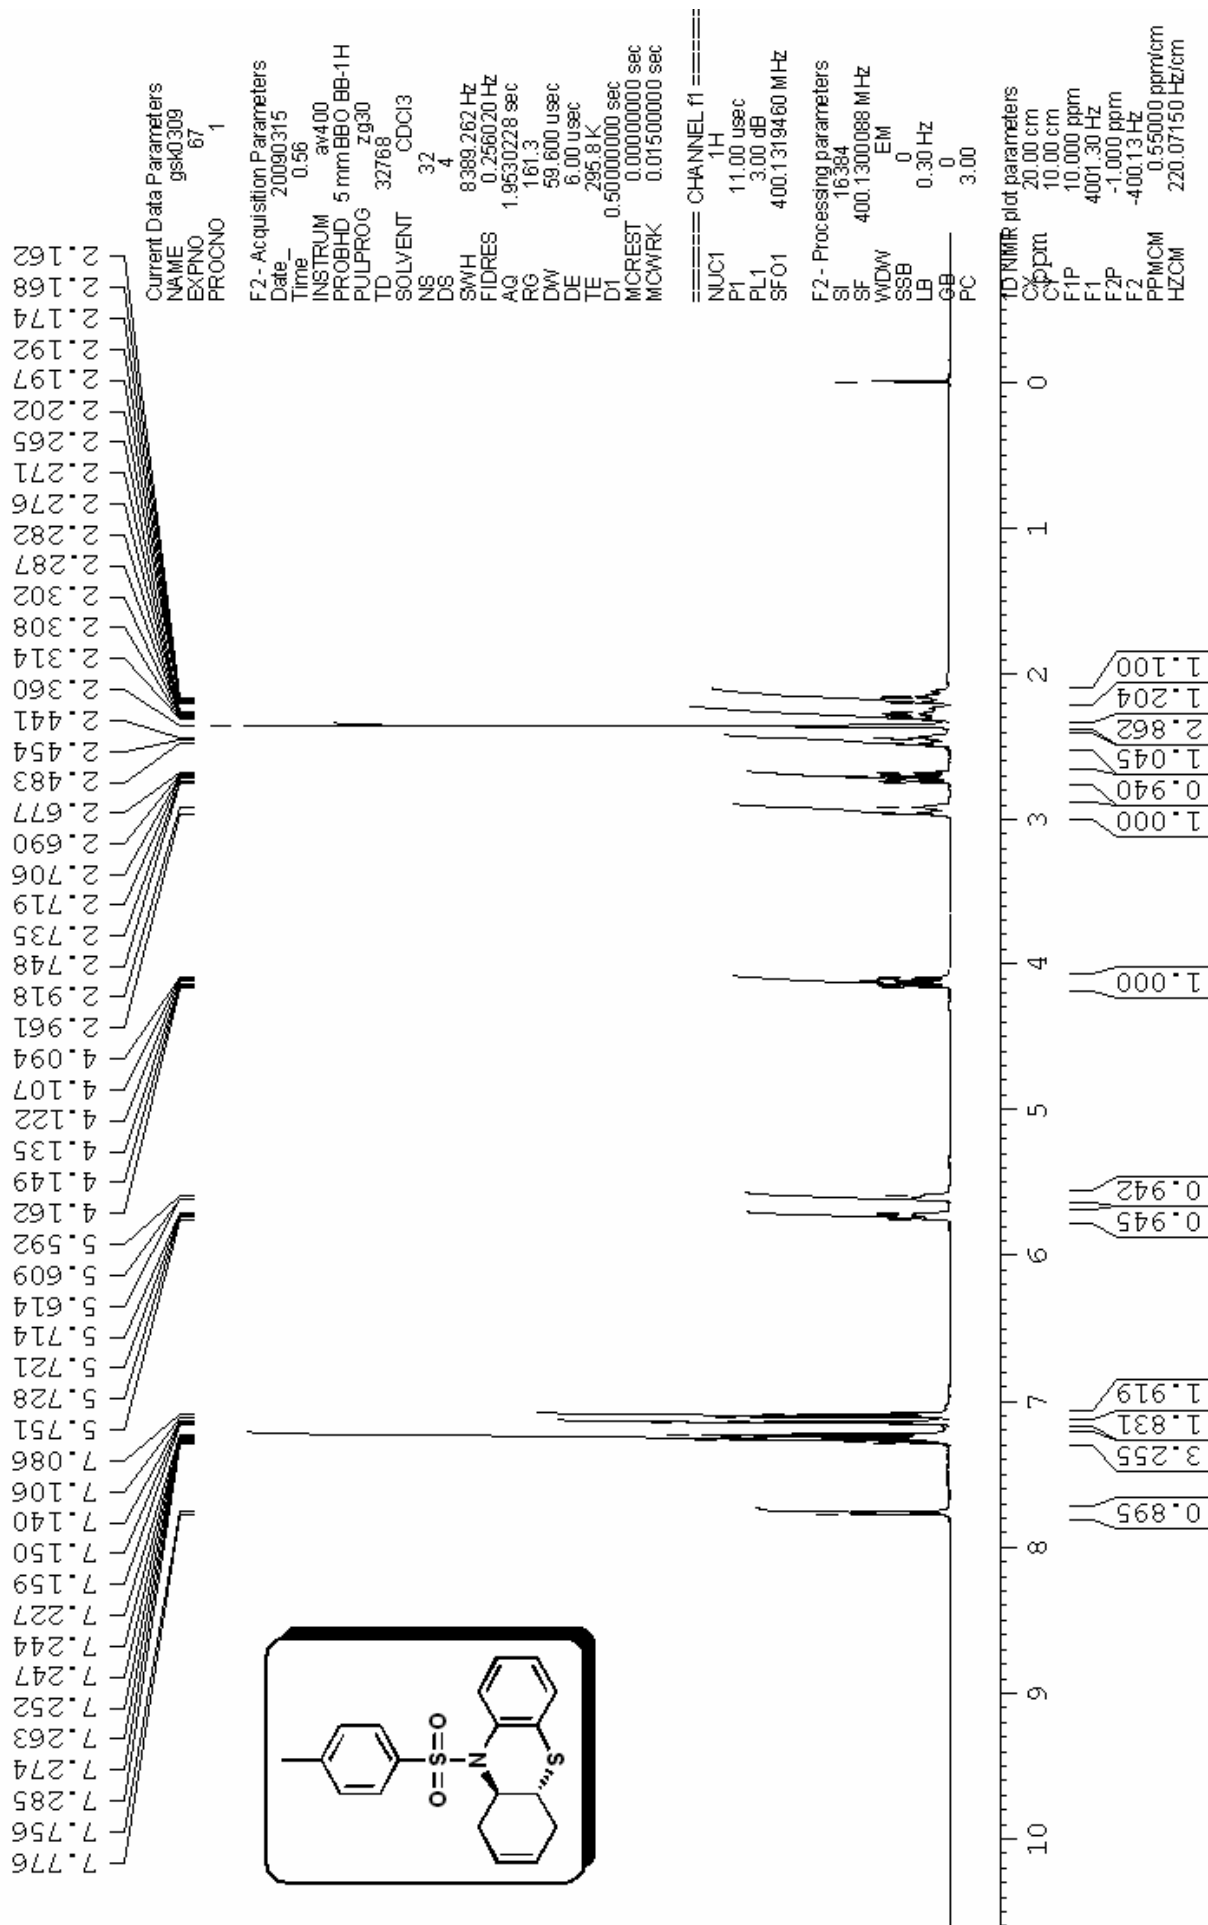



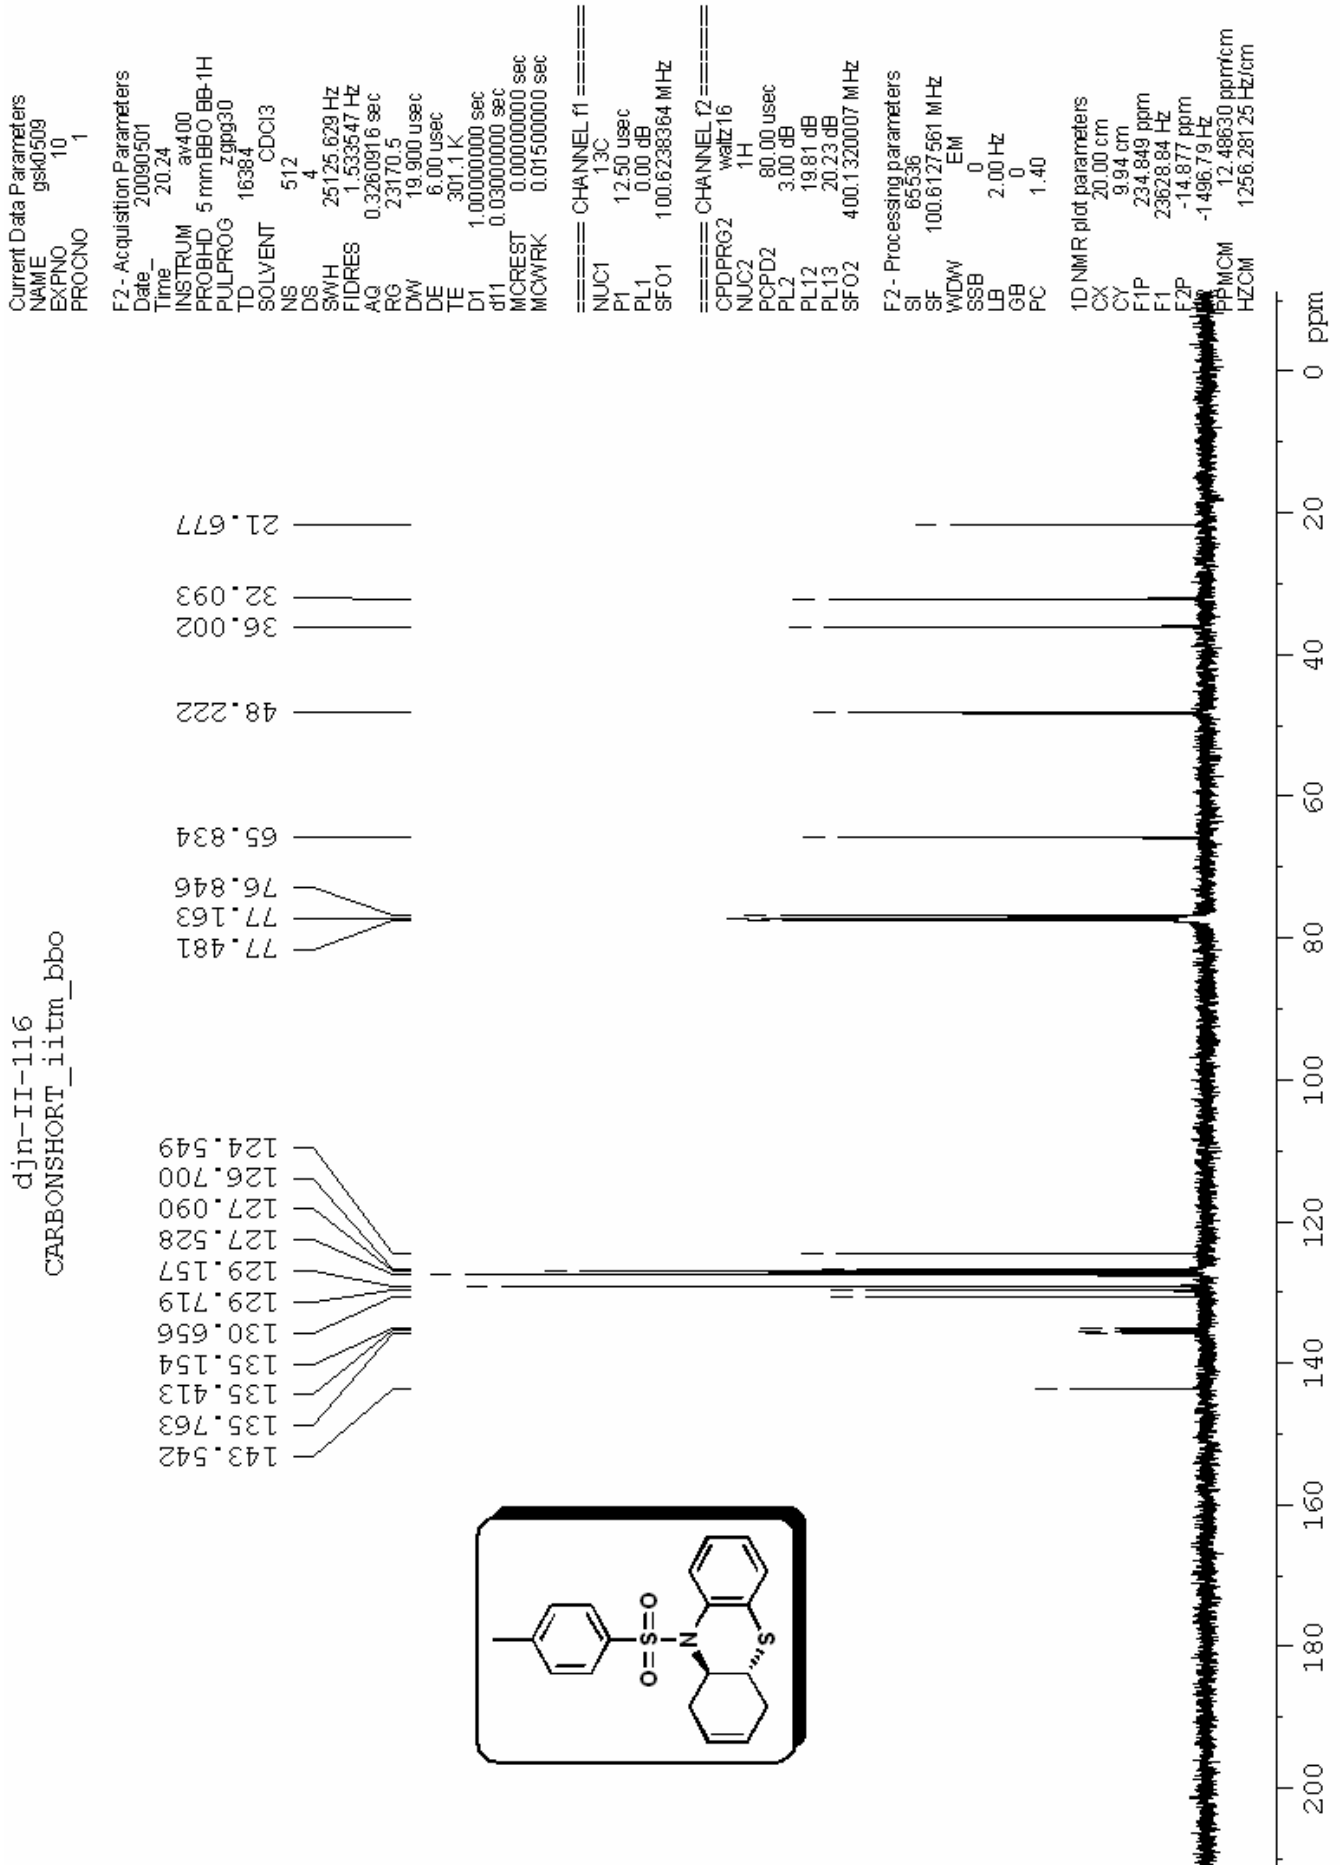

djn-ii-48  
PROTON(-5to15)\_iitm\_bbo

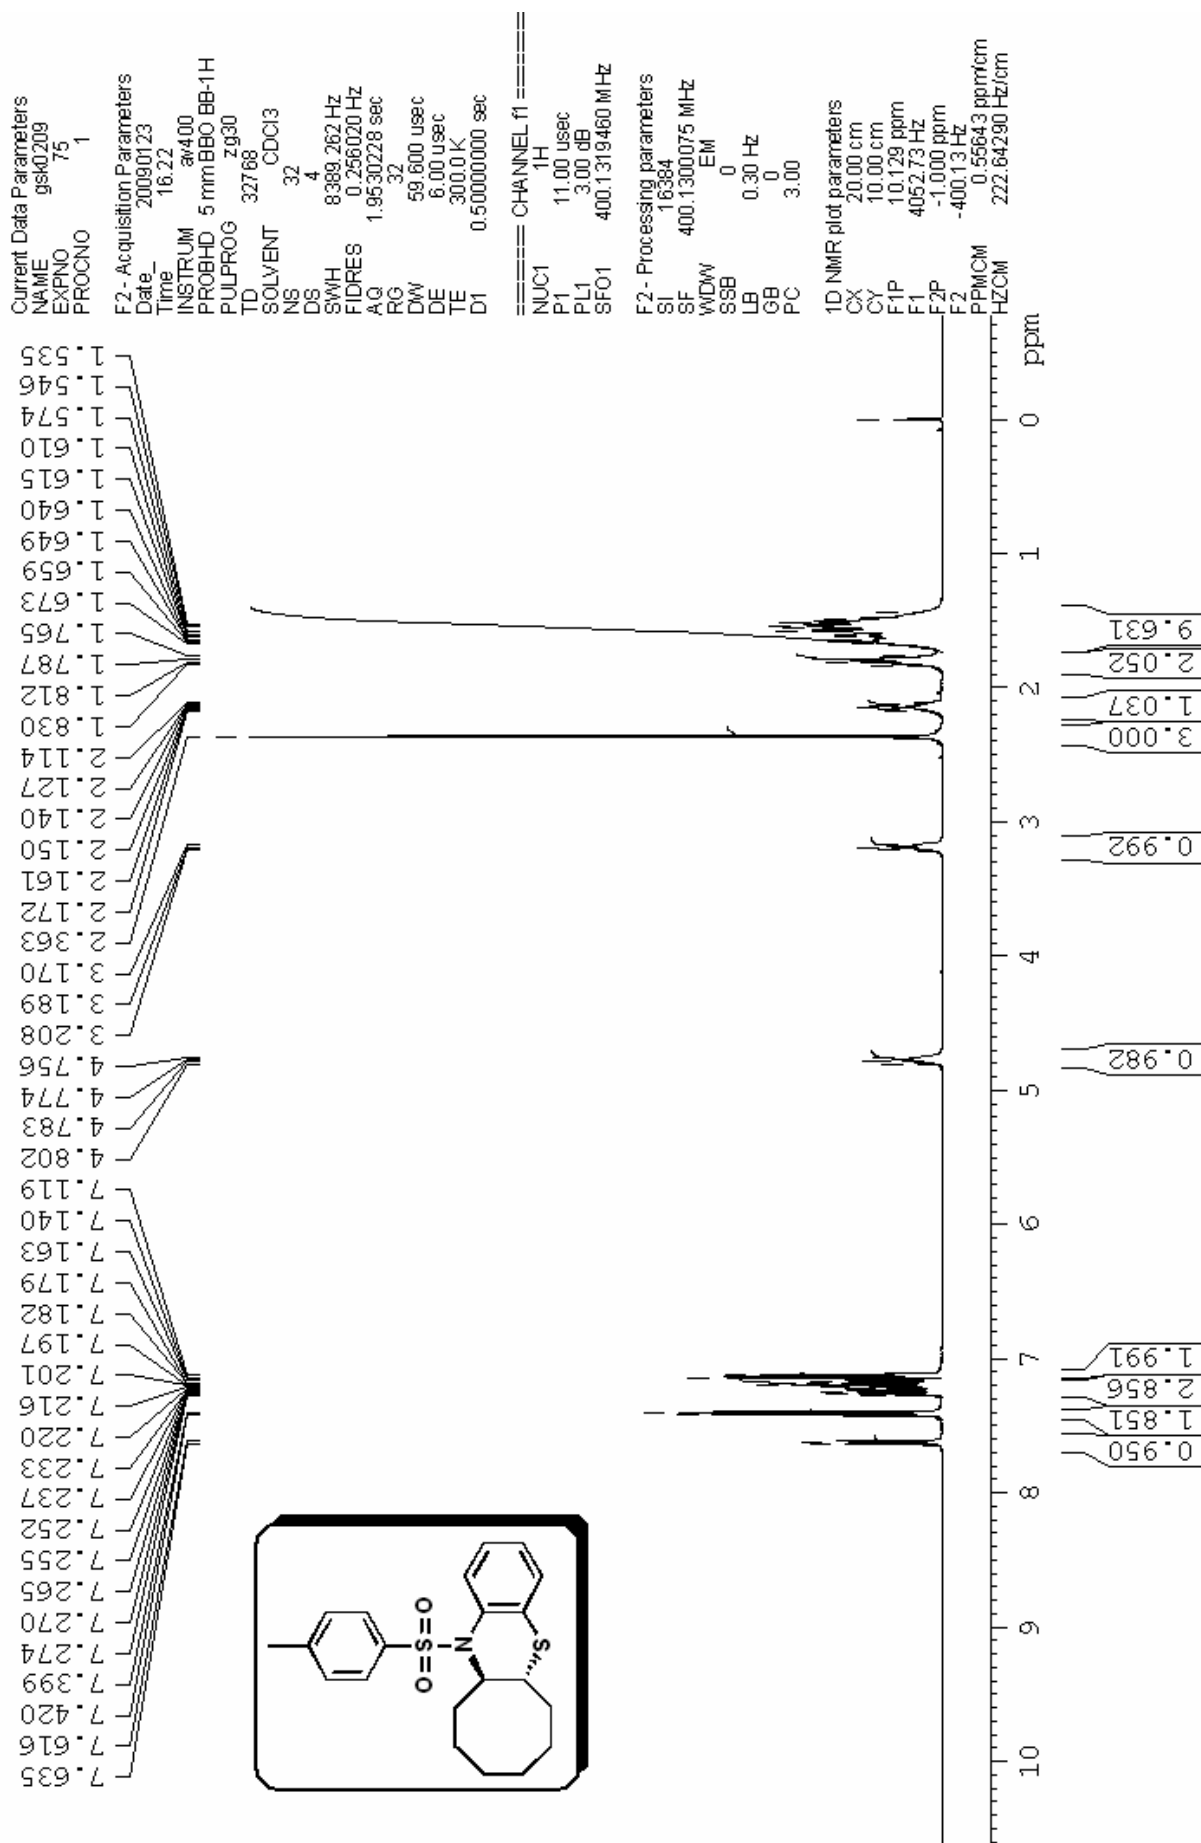

Current Data Parameters  
NAME gsk0109  
EXPNO 194  
PROCNO 1

F2 - Acquisition Parameters  
Date\_ 20090123  
Time 16.25  
INSTRUM aw400  
PROBHD 5 mm/BBO BB-1H  
PULPROG zgpg30  
TD 16384  
SOLVENT CDCl3  
NS 111  
DS 4  
SWH 25125.629 Hz  
FIDRES 1.533547 Hz  
AQ 0.3260916 sec  
RG 1149.4  
DMW 19.900 usec  
DE 6.00 usec  
TE 300.0 K  
D1 1.00000000 sec  
d11 0.03000000 sec  
d12 0.00002000 sec

==== CHANNEL f1 =====  
NUC1 13C  
P1 11.00 usec  
PL1 0.00 dB  
SFO1 100.6238364 MHz

==== CHANNEL f2 =====  
CPDPRG2 waltz16  
NUC2 1H  
PCPD2 80.00 usec  
PL2 3.00 dB  
PL12 20.23 dB  
PL13 23.23 dB  
SFO2 400.1320007 MHz

F2 - Processing parameters  
SI 131072  
SF 100.6127610 MHz  
WDW EM  
SSB 0  
LB 1.00 Hz  
GB 0  
PC 1.40

1D NMR plot parameters  
CX 20.00 cm  
CY 9.94 cm  
F1P 234.849 ppm  
F1 23628.84 Hz  
F2P -14.877 ppm  
F2 -1496.79 Hz  
PPMCM 12.48630 ppm/cm  
HZCM 1256.28125 Hz/cm

djn-ii-48  
CARBONSHORT\_iitm\_bbo

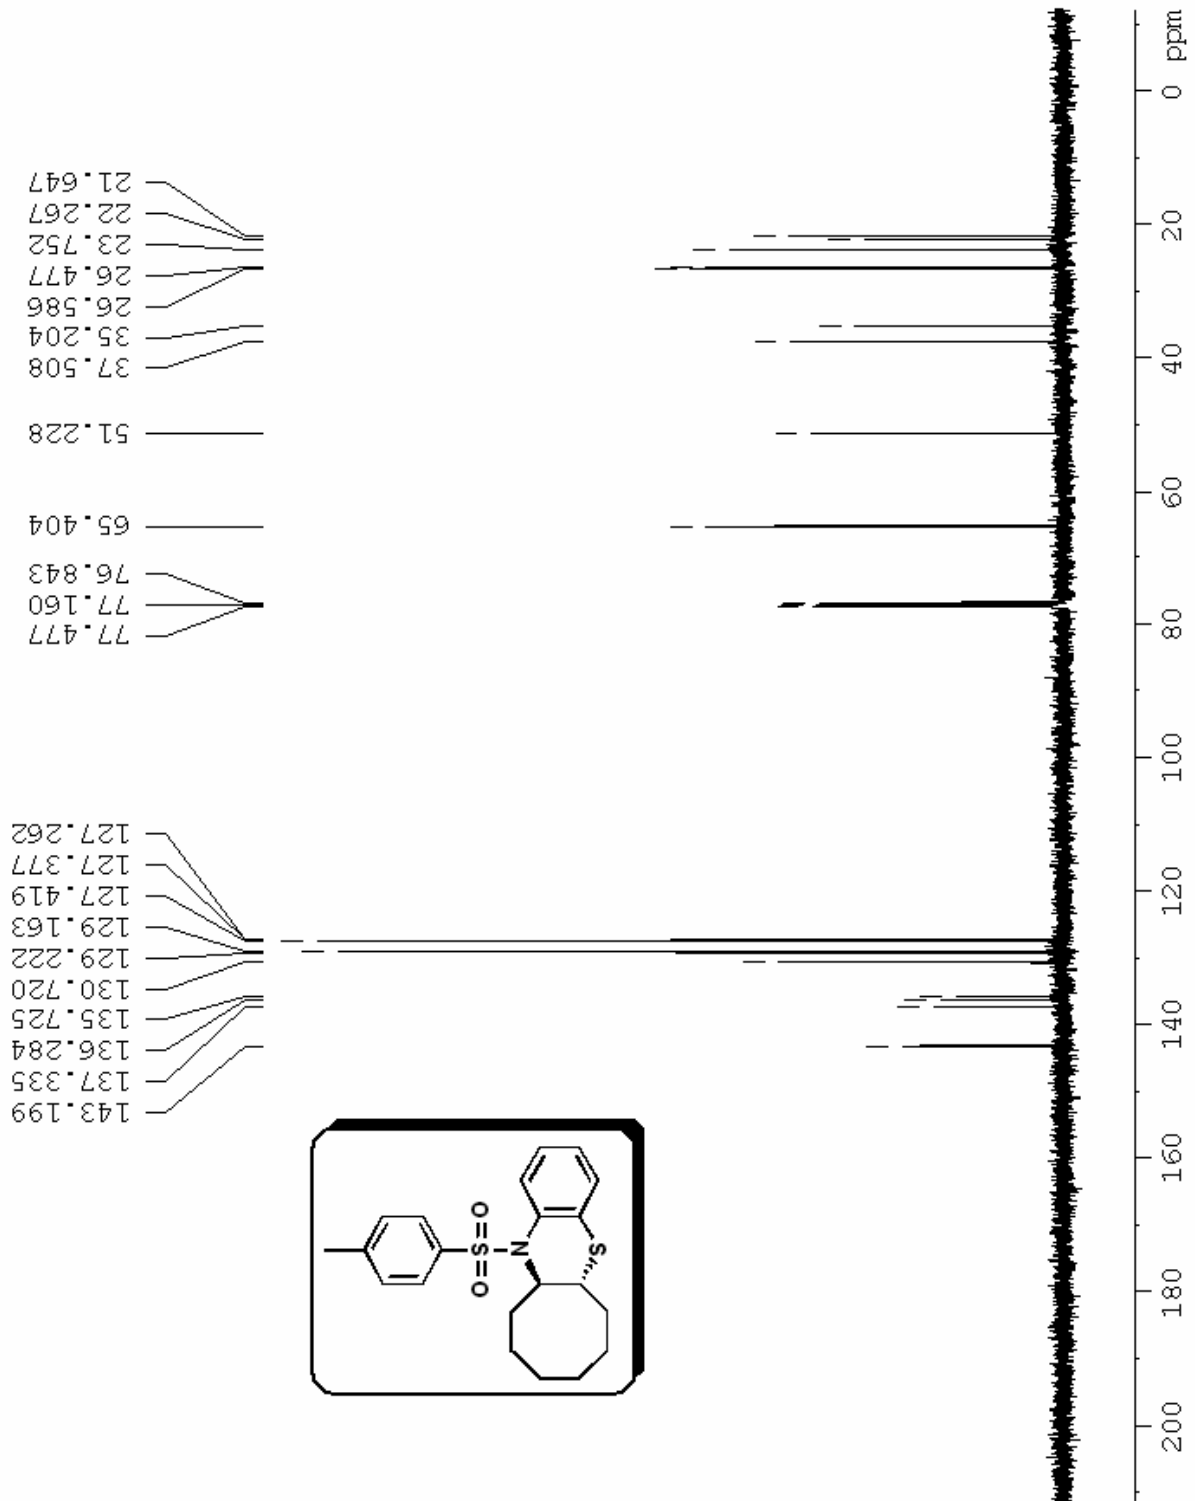

djn-ii-96  
 PROTON(-5to15)\_iitm\_bbo

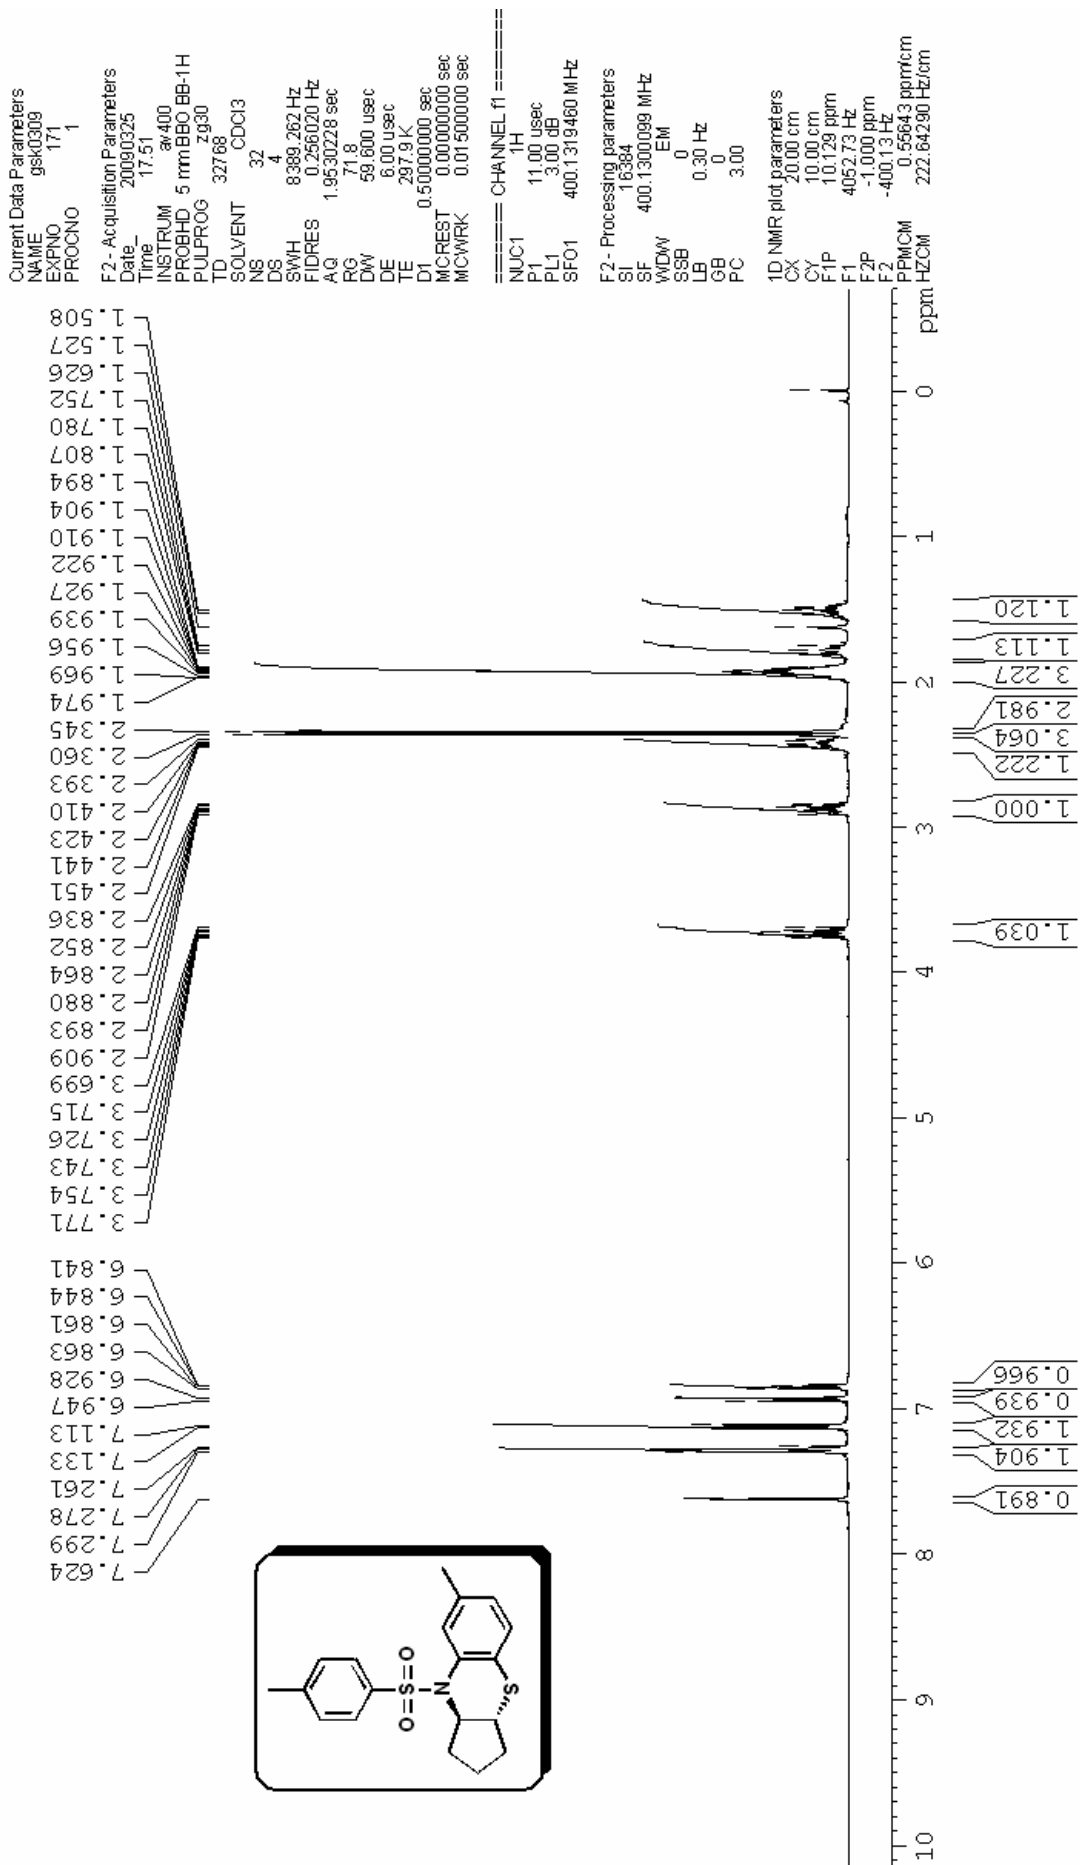

Current Data Parameters  
 NAME gsk0309  
 EXPNO 172  
 PROCNO 1

F2 - Acquisition Parameters  
 Date\_ 20090325  
 Time\_ 17.57  
 INSTRUM av400  
 PROBHD 5 mm BBO BB-1H  
 PULPROG zgpg30  
 TD 16384  
 SOLVENT CDCl3  
 NS 245  
 DS 4  
 SWH 25125.629 Hz  
 FIDRES 1.533547 Hz  
 AQ 0.3260916 sec  
 RG 1149.4  
 DW 19.900 usec  
 DE 6.00 usec  
 TE 298.4 K  
 D1 1.00000000 sec  
 d11 0.03000000 sec  
 MCREST 0.00000000 sec  
 MCWRK 0.01500000 sec

==== CHANNEL f1 =====  
 NUC1 13C  
 P1 11.00 usec  
 PL1 0.00 dB  
 SFO1 100.6238364 MHz

==== CHANNEL f2 =====  
 CPDPRG2 waltz16  
 NUC2 1H  
 PCPD2 80.00 usec  
 PL2 3.00 dB  
 PL12 20.23 dB  
 PL13 20.23 dB  
 SFO2 400.1320007 MHz

F2 - Processing parameters  
 SI 65536  
 SF 100.6127595 MHz  
 WIDW E M  
 SSB 0  
 LB 2.00 Hz  
 GB 0  
 PC 1.40

1D NMR plot parameters  
 CX 20.00 cm  
 CY 9.94 cm  
 F1P 234.849 ppm  
 F1 23628.84 Hz  
 F2P -14.877 ppm  
 F2 -1496.79 Hz  
 PPMCM 12.48630 ppm/cm  
 HZCM 1256.28125 Hz/cm

djnn-ii-96  
 CARBONSHORT\_ii\_tm\_bbo

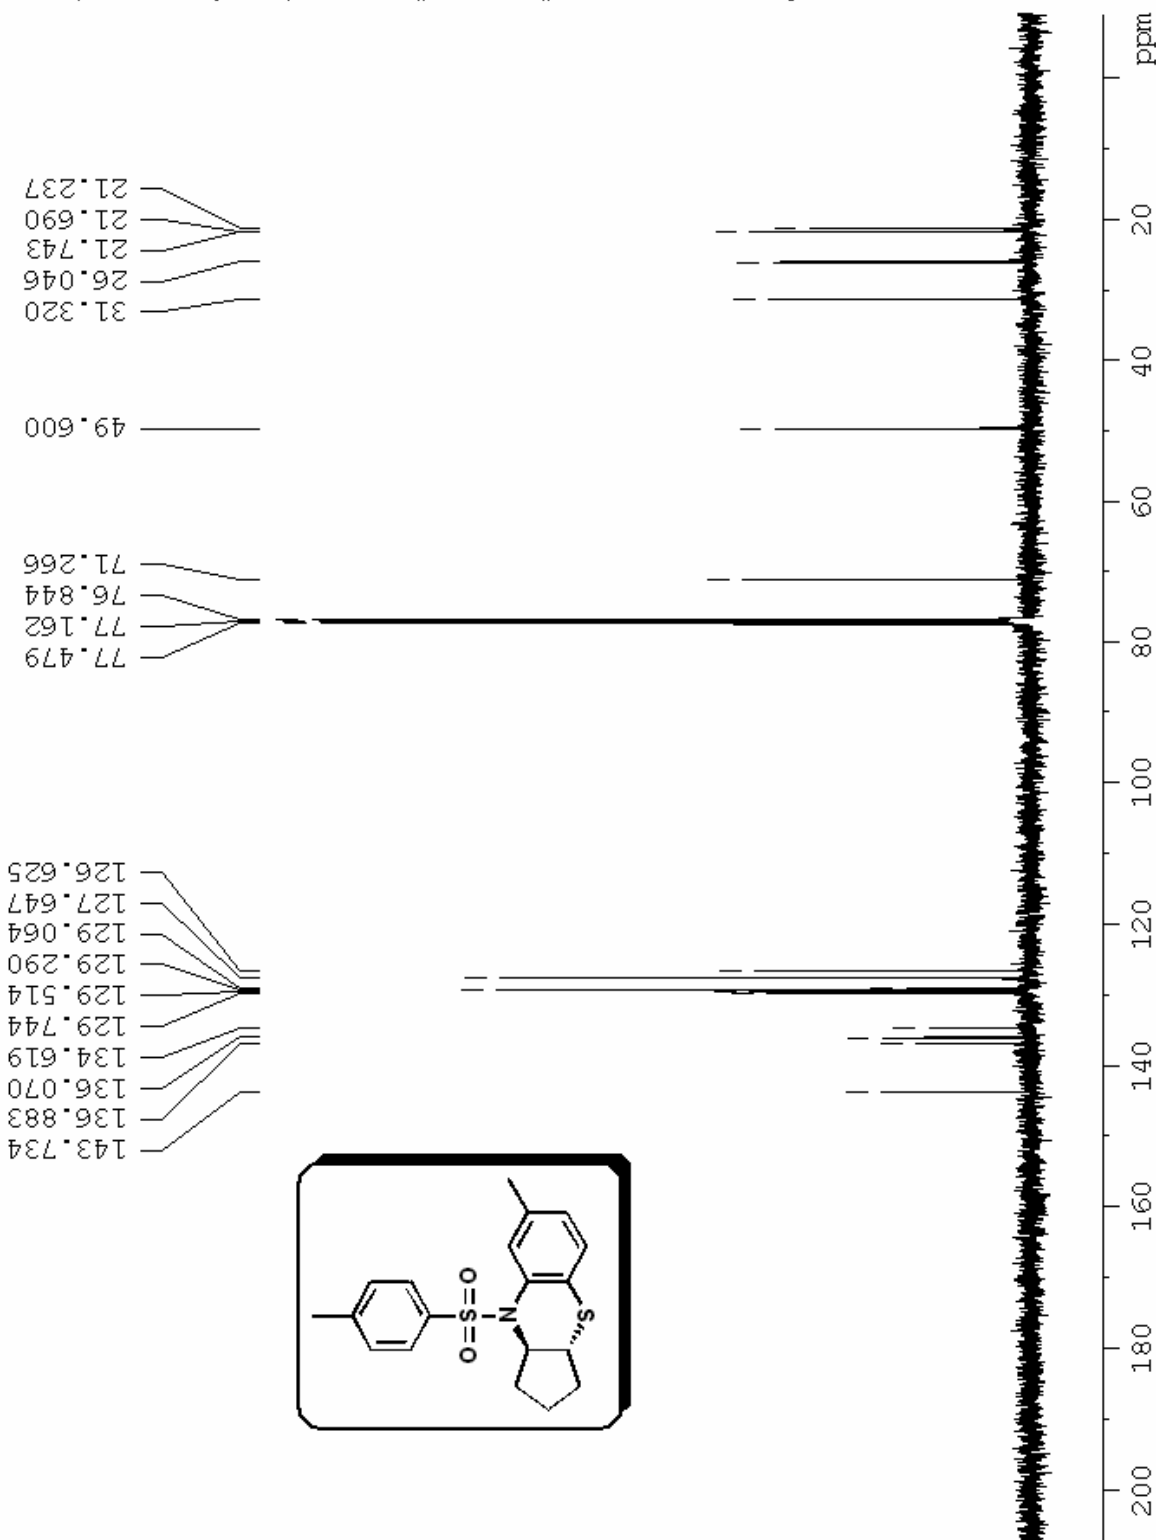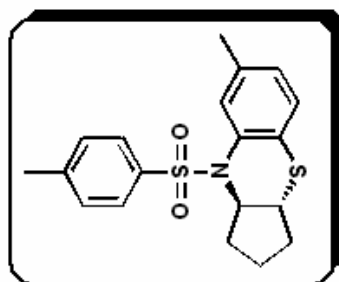

djn-ii-95  
PROTON(-5to15)\_iitm\_bbo

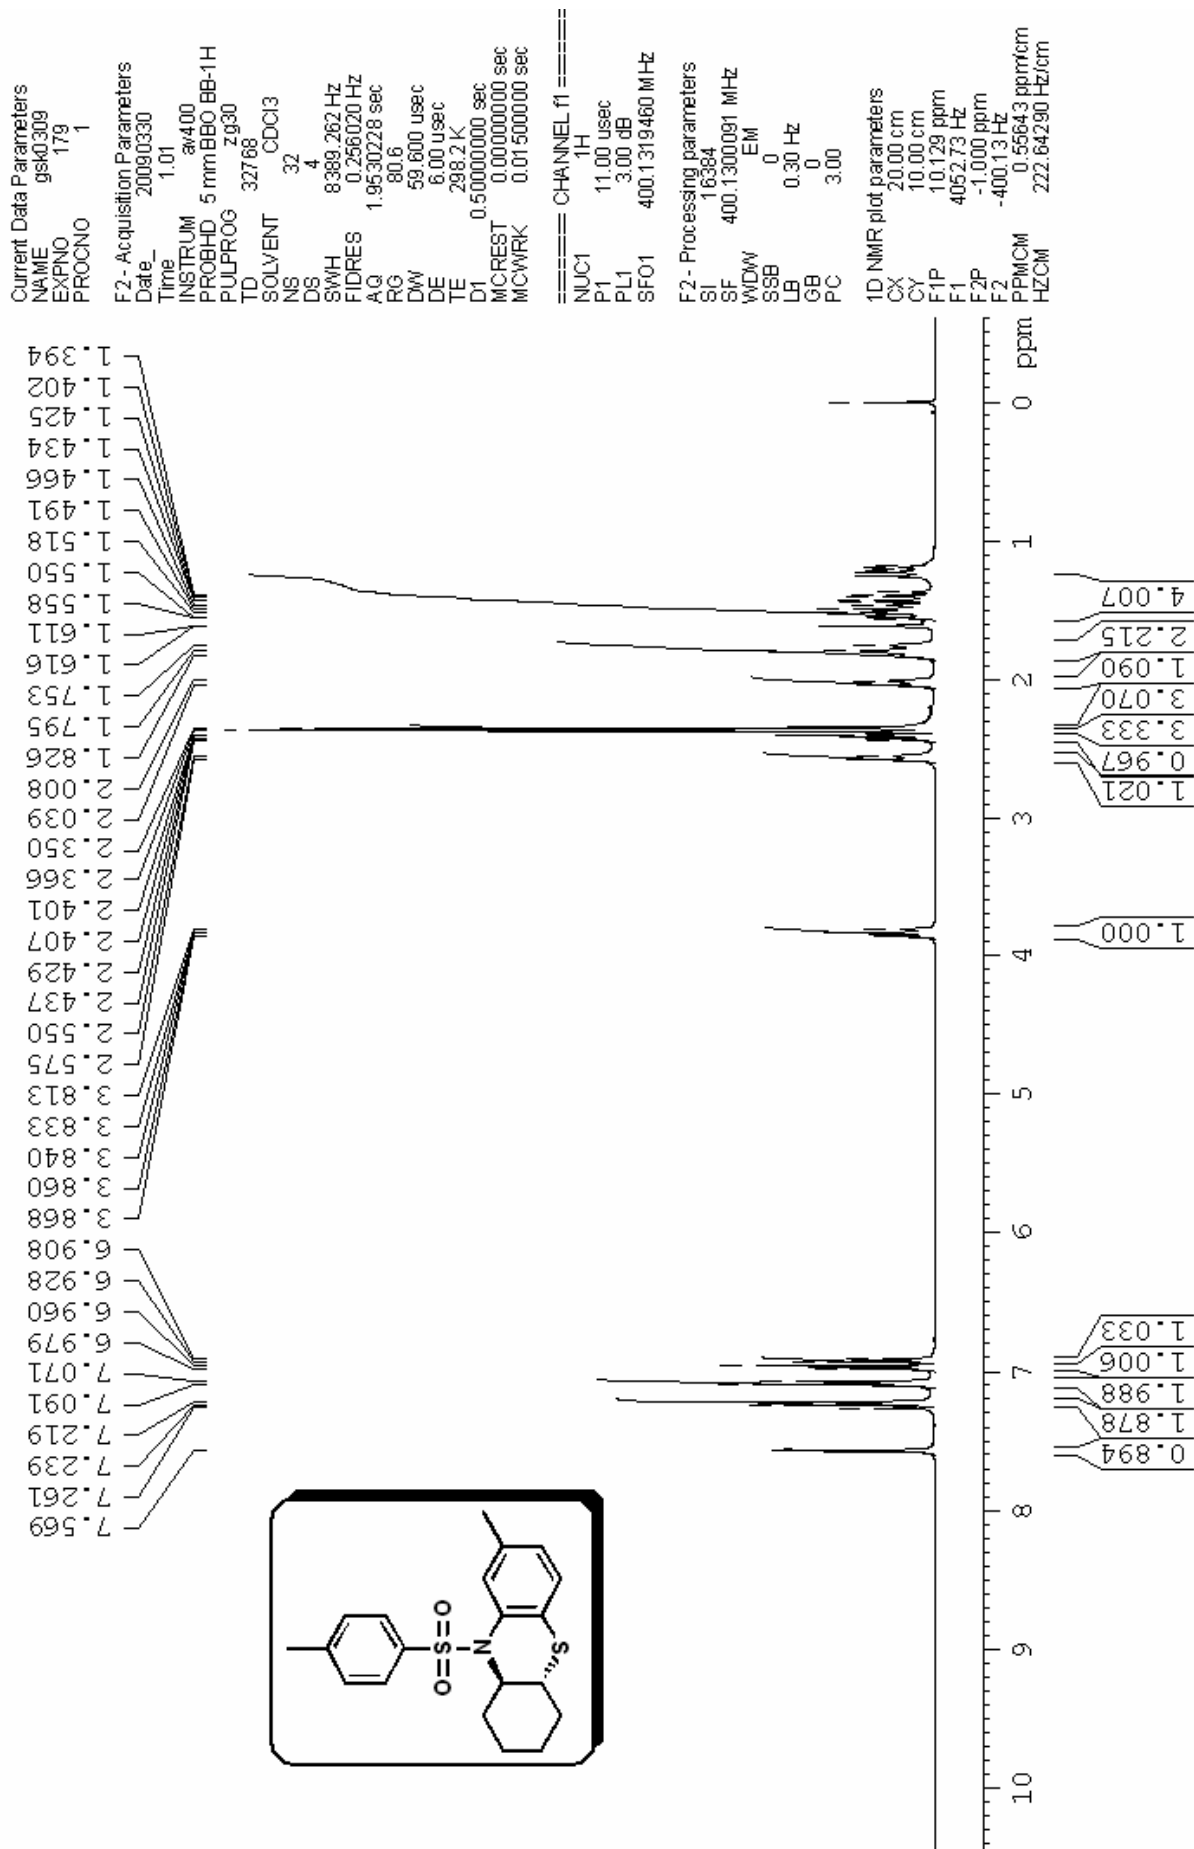

Current Data Parameters  
 NAME gsk0309  
 EXPNO 170  
 PROCNO 1

F2 - Acquisition Parameters  
 Date\_ 20090325  
 Time\_ 17.44  
 INSTRUM av400  
 PROBHD 5 mm BBO BB-1H  
 PULPROG zgpg30  
 TD 16384  
 SOLVENT CDCl3  
 NS 248  
 DS 4  
 SWH 25125.629 Hz  
 FIDRES 1.533547 Hz  
 AQ 0.3260916 sec  
 RG 1149.4  
 DW 19.900 usec  
 DE 6.00 usec  
 TE 298.5 K  
 D1 1.00000000 sec  
 d11 0.03000000 sec  
 MCREST 0.00000000 sec  
 MCWRK 0.01500000 sec

==== CHANNEL f1 =====  
 NUC1 13C  
 P1 11.00 usec  
 PL1 0.00 dB  
 SFO1 100.6238364 MHz  
 ===== CHANNEL f2 =====  
 CPDPRG2 waltz16  
 NUC2 1H  
 P2 80.00 usec  
 PL2 3.00 dB  
 PL12 20.23 dB  
 PL13 20.23 dB  
 SFO2 400.1320007 MHz

F2 - Processing parameters  
 SI 65536  
 SF 100.6127630 MHz  
 WIDW EM  
 SSB 0  
 LB 2.00 Hz  
 GB 0  
 PC 1.40

1D NMR plot parameters  
 CX 20.00 cm  
 CY 9.94 cm  
 F1P 234.849 ppm  
 F1 23628.84 Hz  
 F2P -14.877 ppm  
 F2 -1496.79 Hz  
 PPMCM 12.48630 ppm/cm  
 HZCM 1256.28125 Hz/cm

djn-ii-95  
 CARBONSHORT\_iitm\_bbo

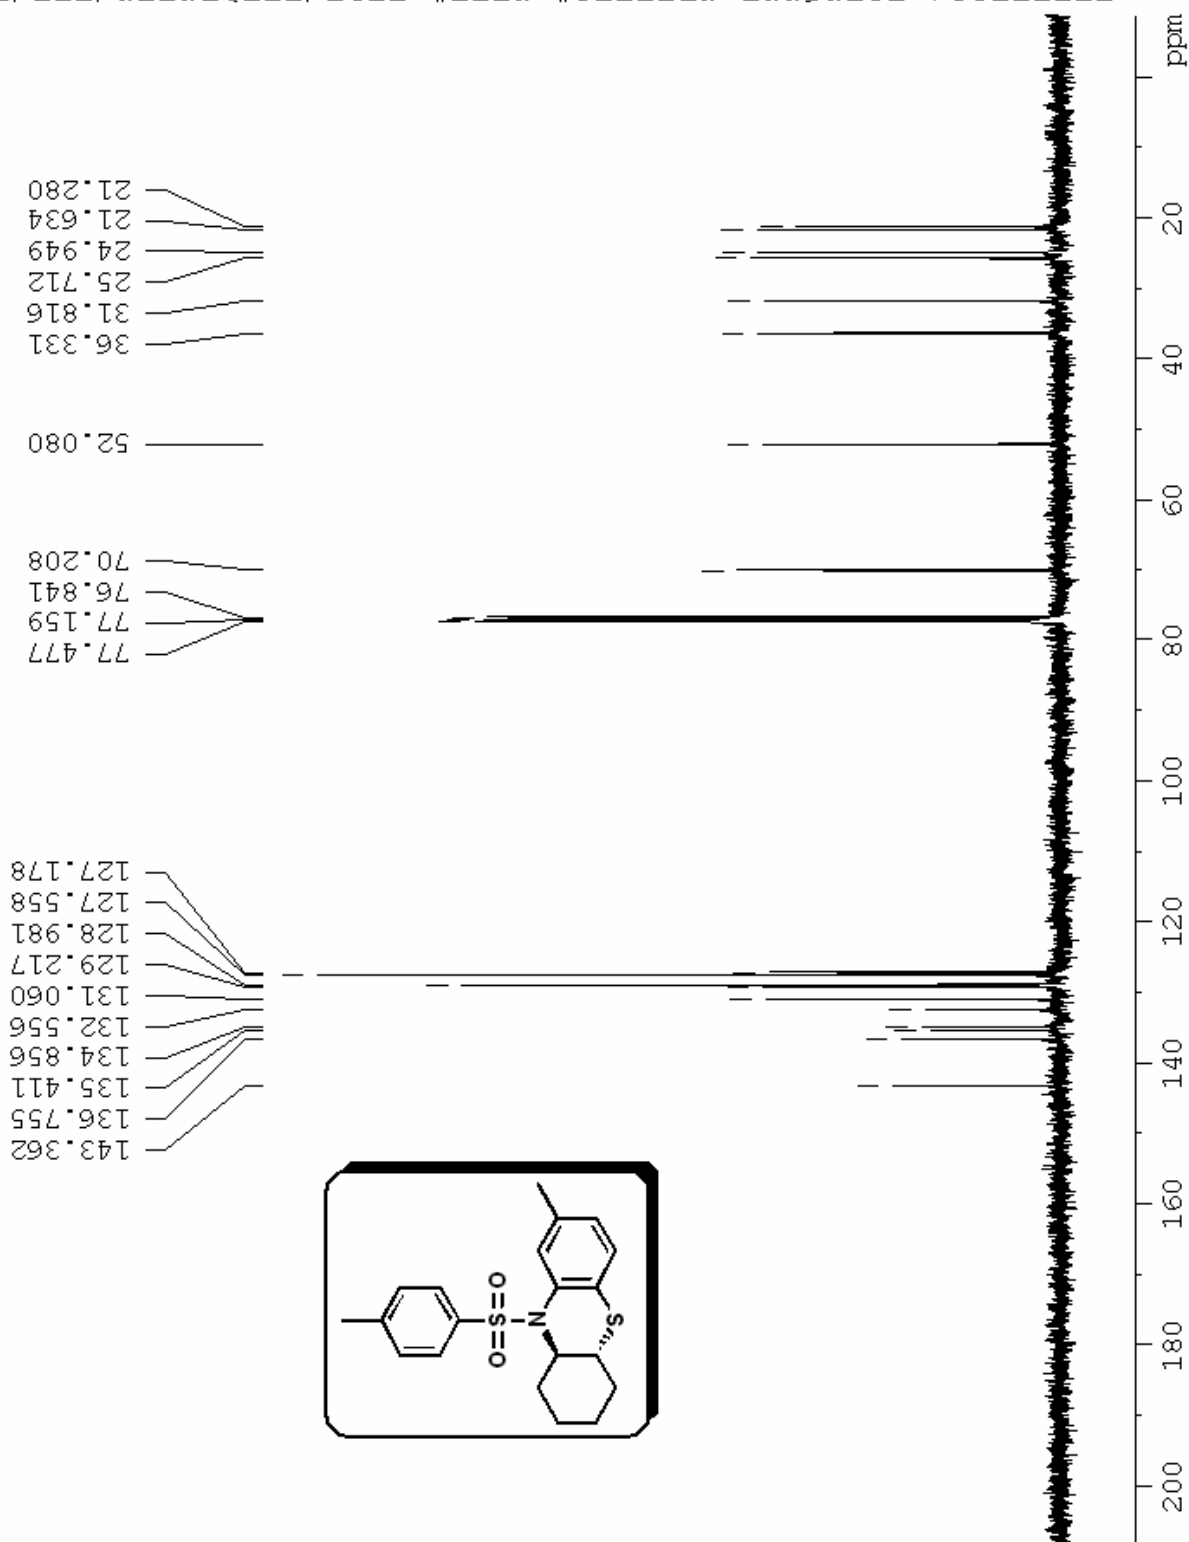

djn-ii-97  
PROTON(-5to15)\_iitm\_bbo

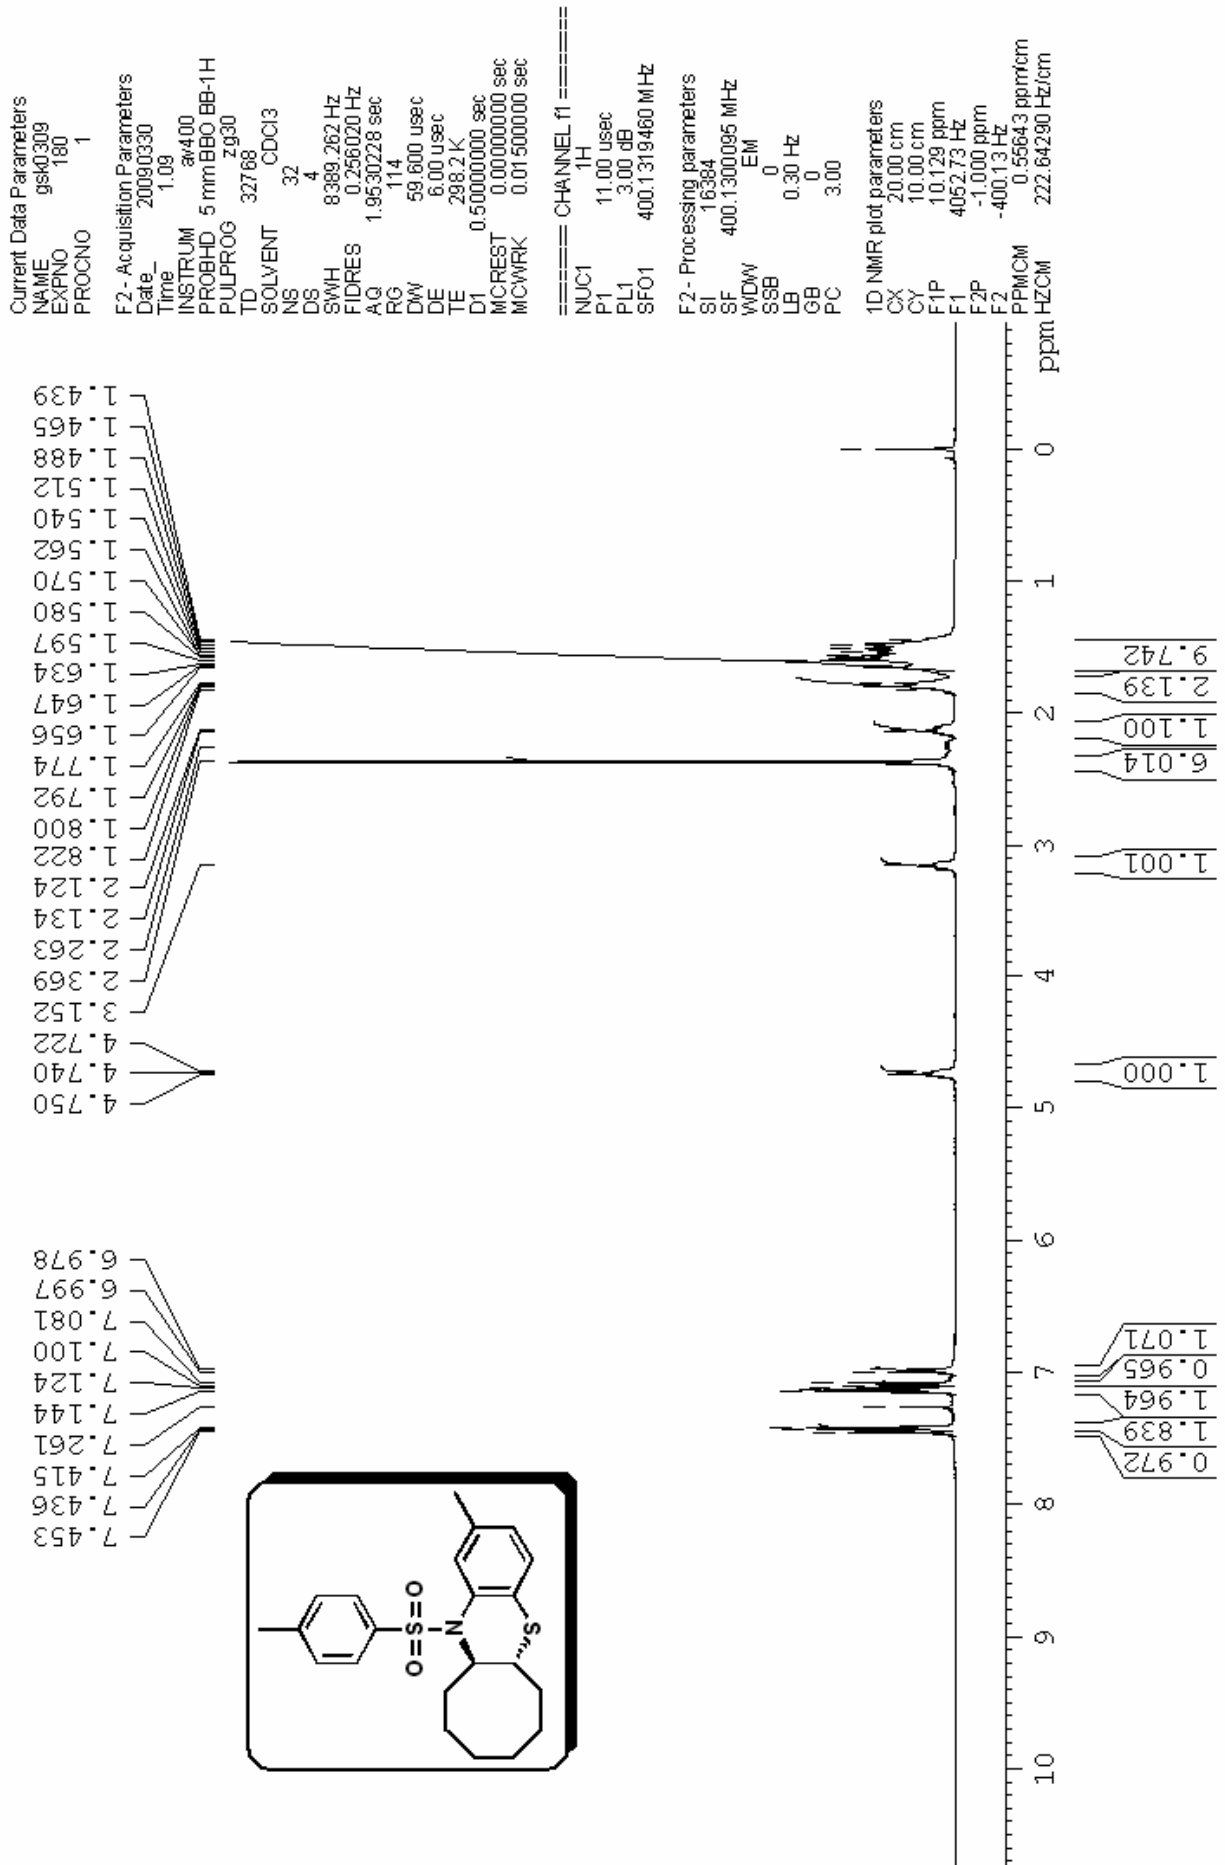



djn-ii-97  
CARBONSHORT\_ii\_tm\_bbo

Current Data Parameters  
NAME gsk0309  
EXPNO 174  
PROCNO 1

F2 - Acquisition Parameters  
Date\_ 20090325  
Time 18:20  
INSTRUM av400  
PROBHD 5 mm BBO BB-1H  
PULPROG zgpg30  
TD 16384  
SOLVENT CDCl3  
NS 308  
DS 4  
SWH 25125.629 Hz  
FIDRES 1.533547 Hz  
AQ 0.3260916 sec  
RG 1149.4  
DW 19.900 usec  
DE 6.00 usec  
TE 298.3 K  
D1 1.00000000 sec  
d11 0.03000000 sec  
MCREST 0.00000000 sec  
MCWRK 0.01500000 sec

==== CHANNEL f1 =====  
NUC1 13C  
P1 11.00 usec  
PL1 0.00 dB  
SFO1 100.6238364 MHz

==== CHANNEL f2 =====  
CPDPRG2 waltz16  
NUC2 1H  
PCPD2 80.00 usec  
PL2 3.00 dB  
PL12 20.23 dB  
PL13 20.23 dB  
SFO2 400.1320007 MHz

F2 - Processing parameters  
SI 65536  
SF 100.6127591 MHz  
WDW EM  
SSB 0  
LB 2.00 Hz  
GB 0  
PC 1.40

1D NMR plot parameters  
CX 20.00 cm  
CY 9.94 cm  
F1P 234.849 ppm  
F1 236.2884 Hz  
F2P -14.877 ppm  
F2 -1496.79 Hz  
PPMCM 12.48630 ppm/cm  
HZCM 1256.28125 Hz/cm

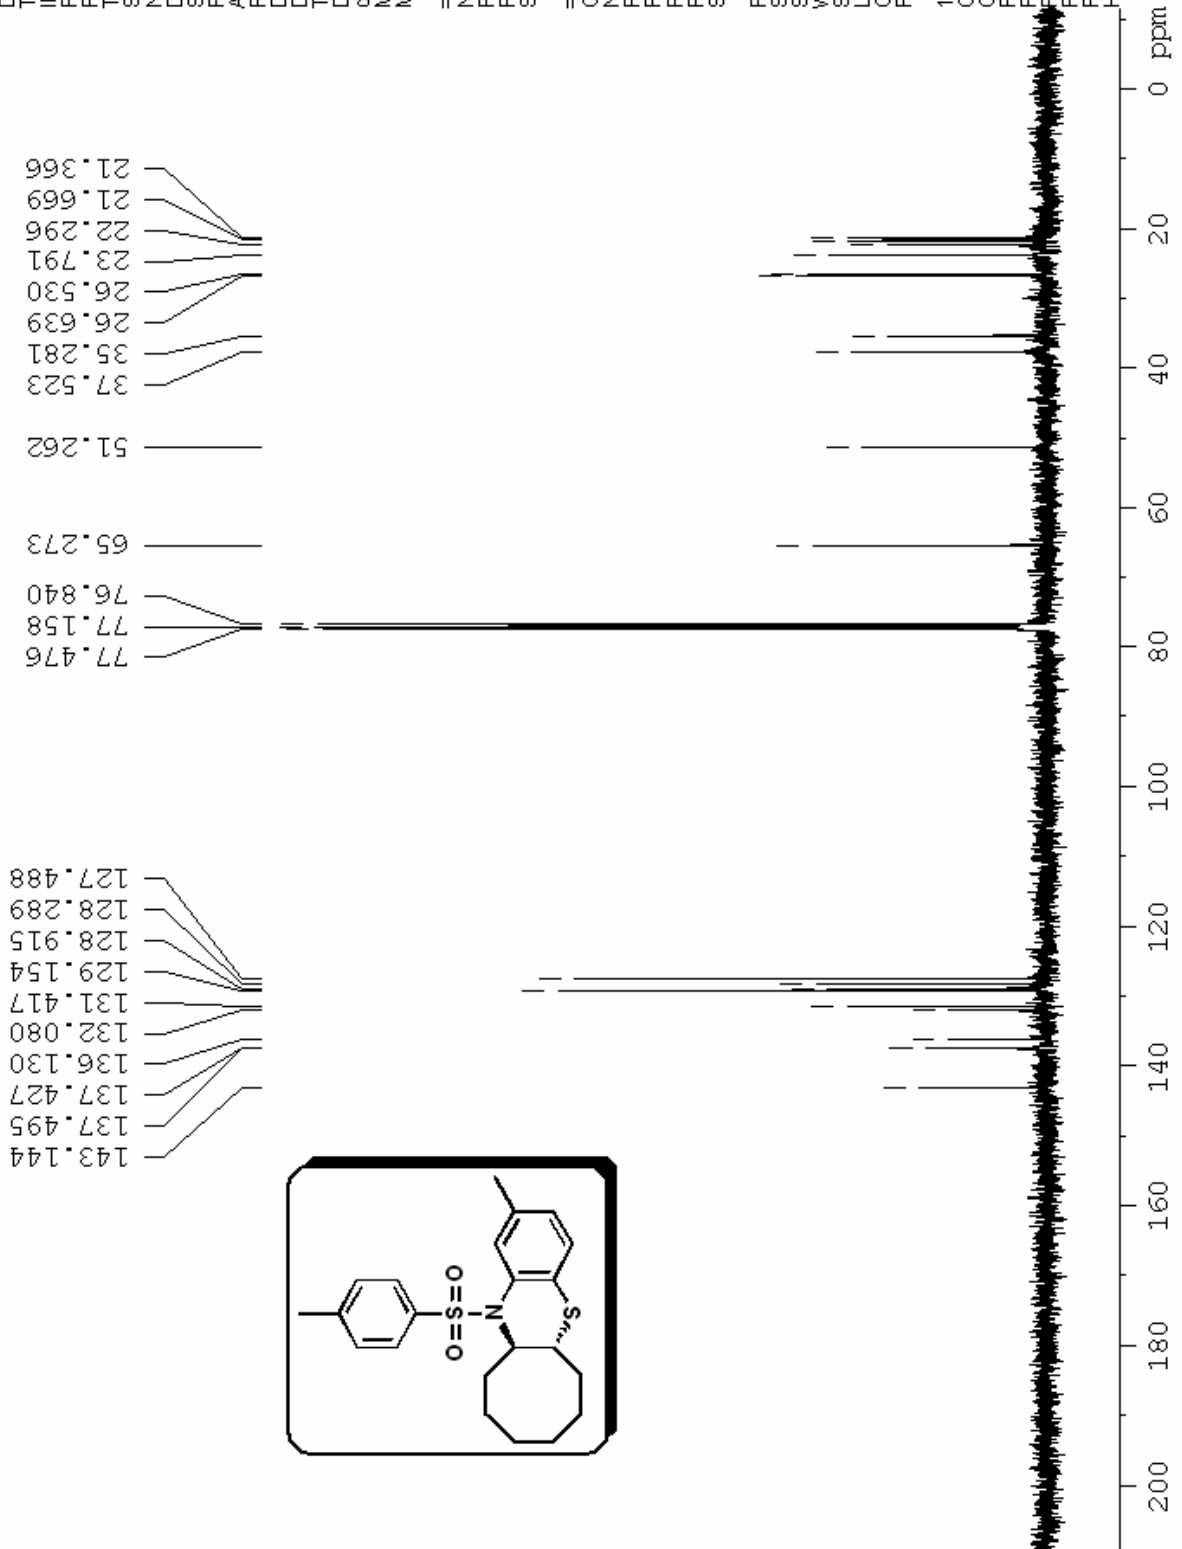

djn-ii-135  
 PROTON (-5to15)\_iitm\_bbo

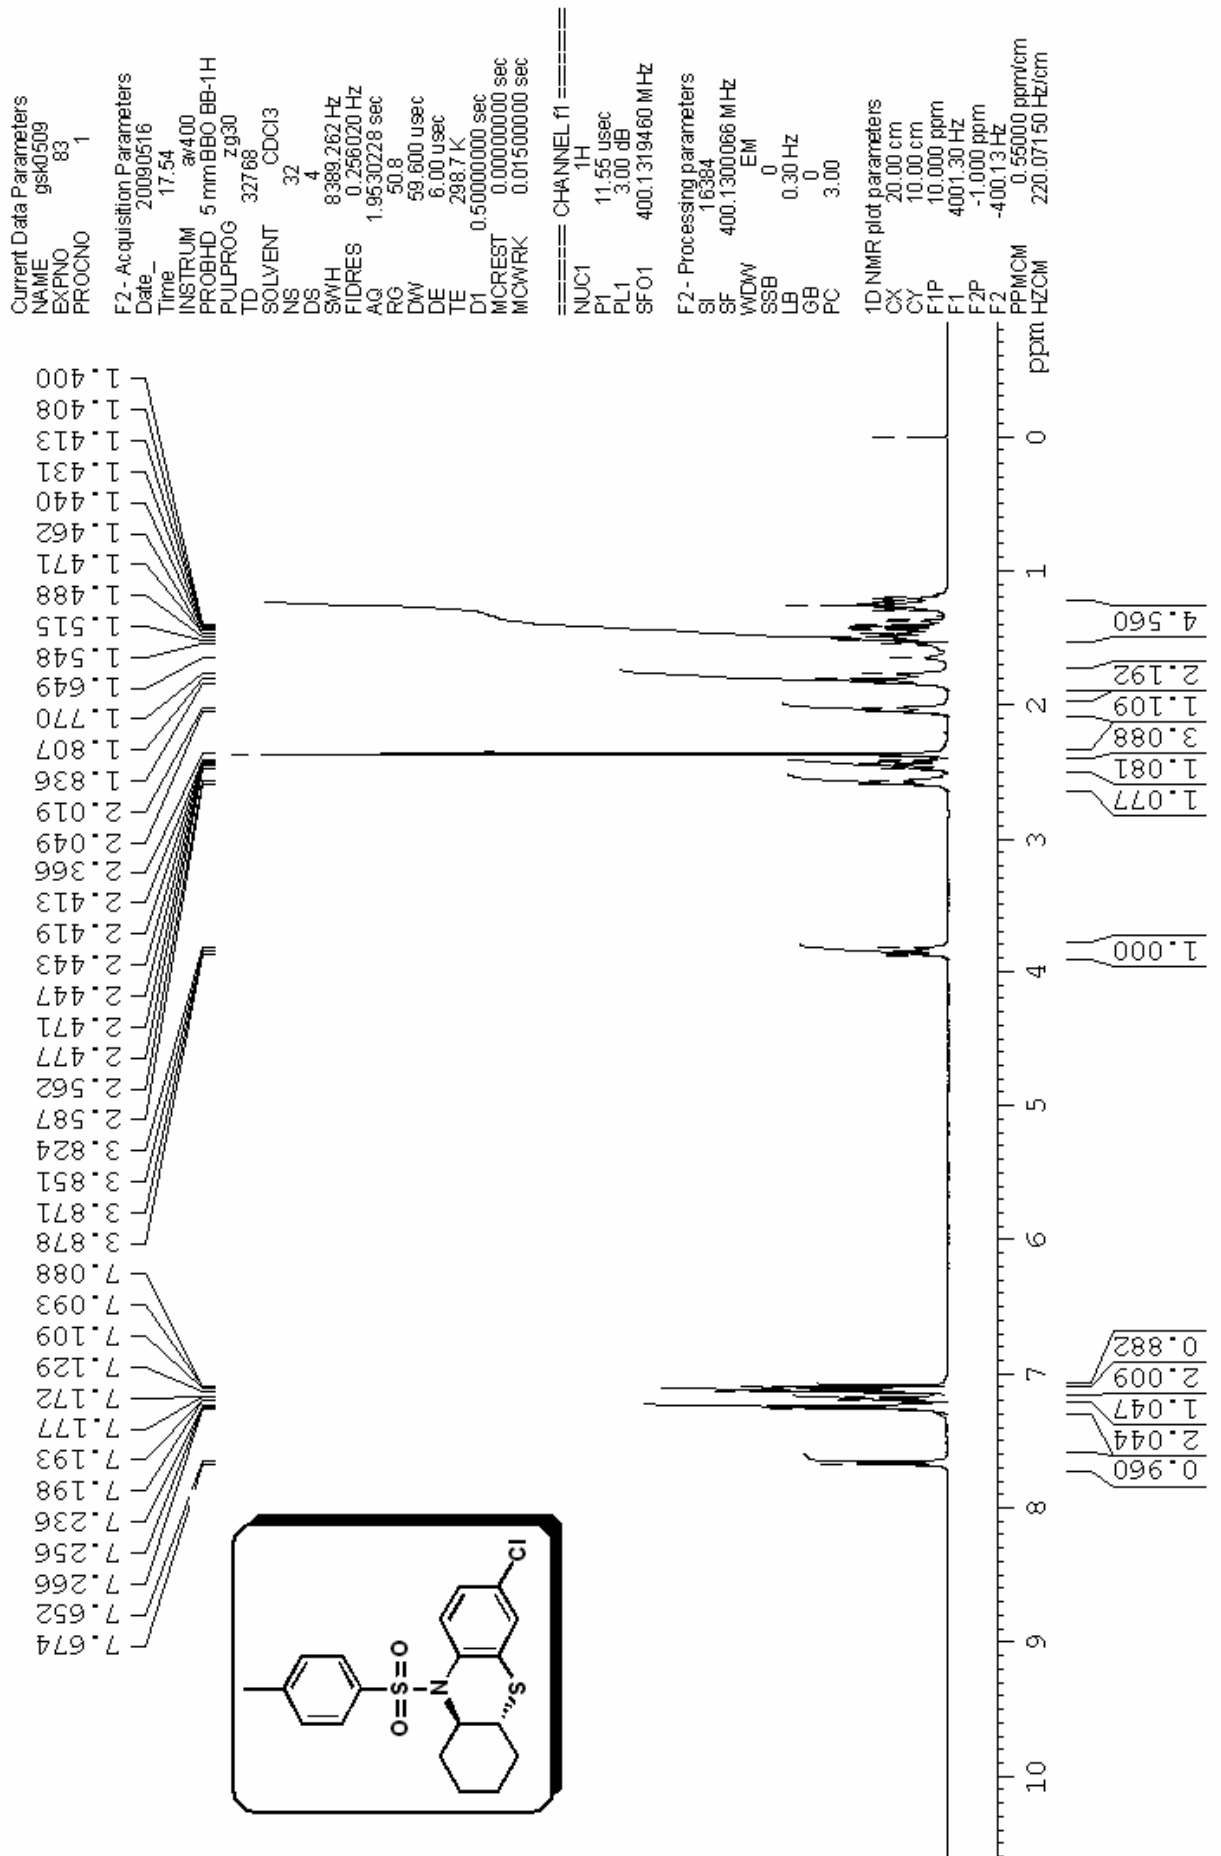

djn-ii-135  
CARBONSHORT\_iitm\_bbo

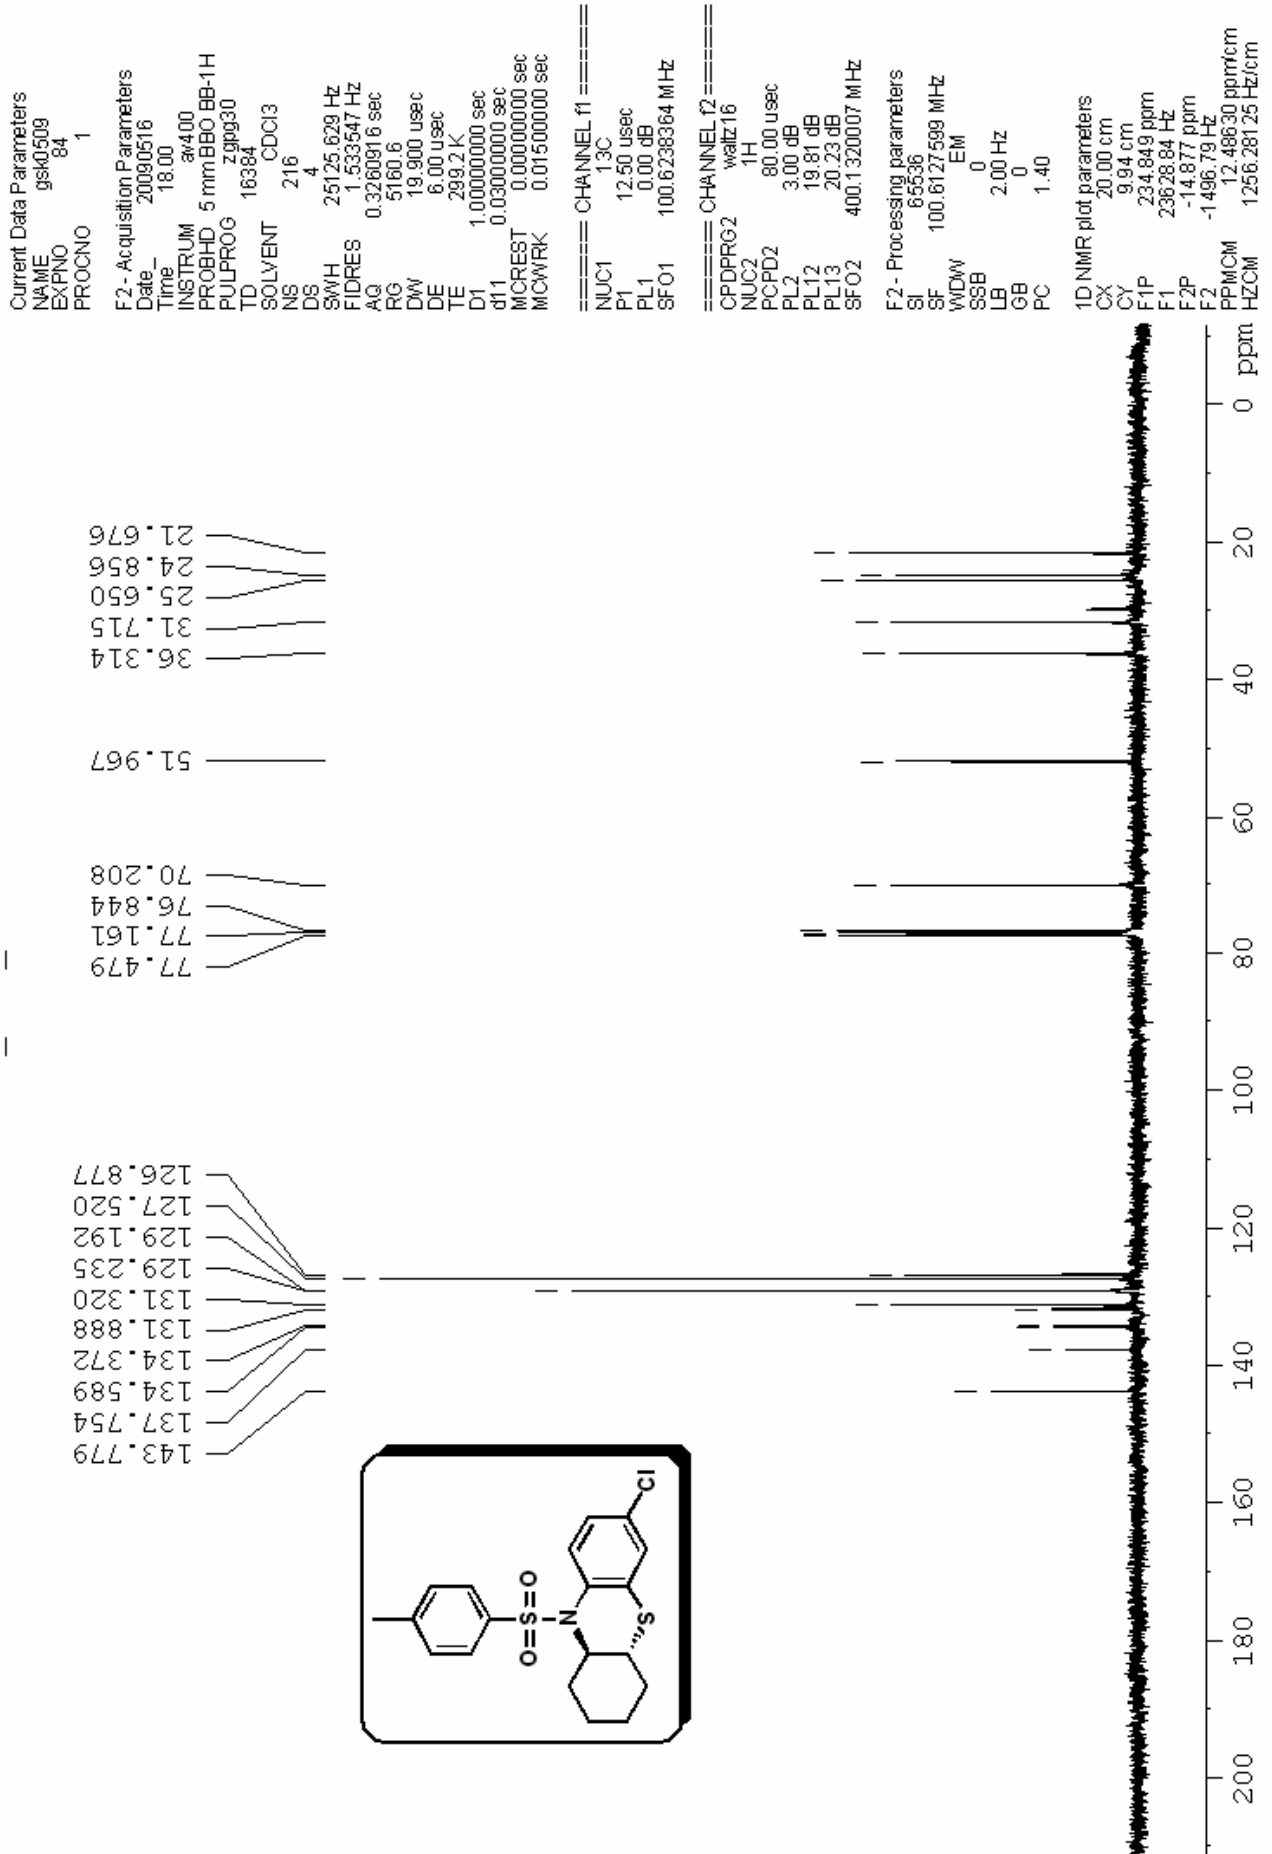

djn-ii-99  
PROTON (-5to15)\_iitm\_bbo

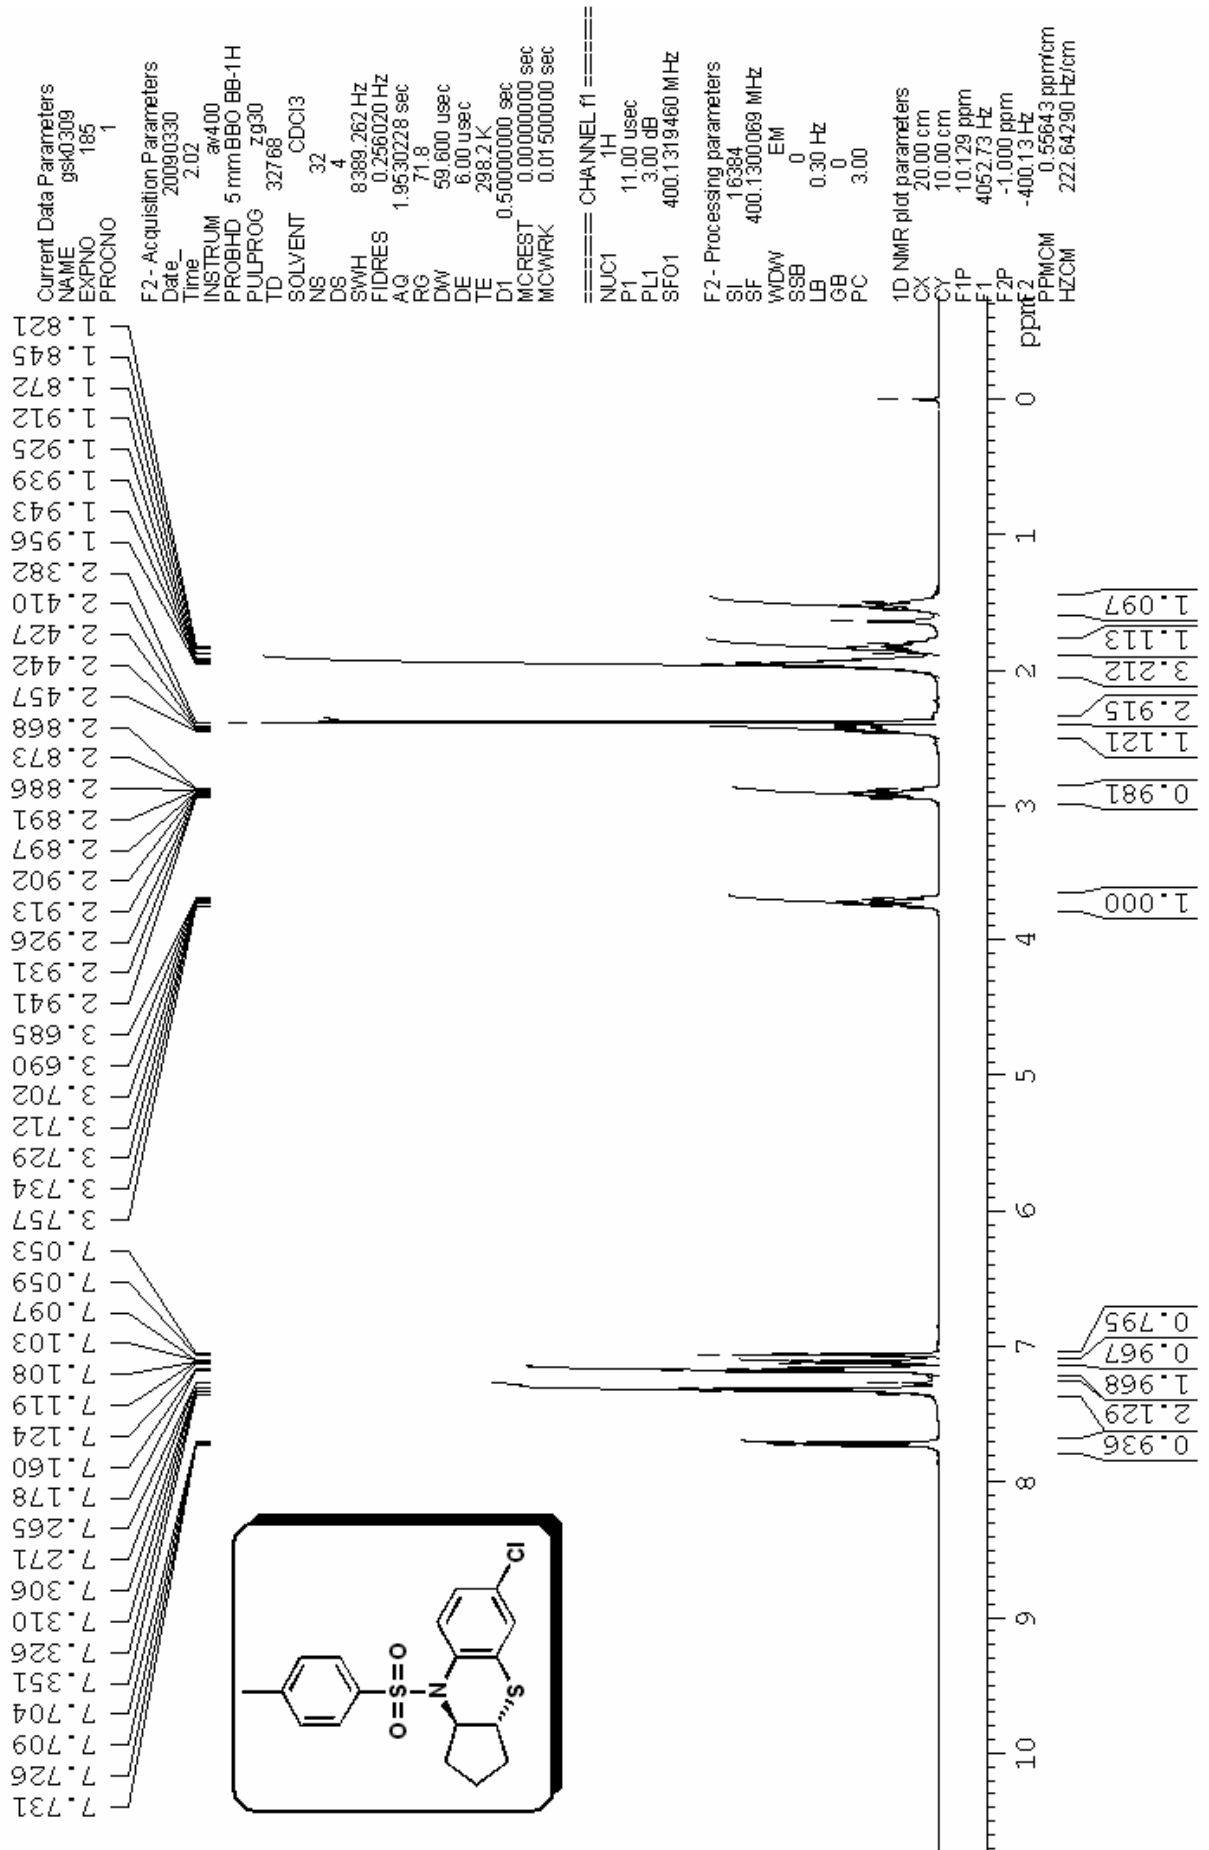

Current Data Parameters  
 NAME gsk0309  
 EXPNO 186  
 PROCNO 1

F2 - Acquisition Parameters  
 Date\_ 20090330  
 Time\_ 2.10  
 INSTRUM av400  
 PROBHD 5 mm BBO BB-1H  
 PULPROG zgpg30  
 TD 16384  
 SOLVENT CDCl3  
 NS 313  
 DS 4  
 SWH 25125.629 Hz  
 FIDRES 1.533547 Hz  
 AQ 0.3260916 sec  
 RG 1149.4  
 DW 19.900 usec  
 DE 6.00 usec  
 TE 298.2 K  
 D1 1.00000000 sec  
 d11 0.03000000 sec  
 MCREST 0.00000000 sec  
 MCWRK 0.01500000 sec

==== CHANNEL f1 =====  
 NUC1 13C  
 P1 11.00 usec  
 PL1 0.00 dB  
 SFO1 100.6236364 MHz  
 ===== CHANNEL f2 =====  
 CPDPRG2 waltz16  
 NUC2 1H  
 PCPD2 80.00 usec  
 PL2 3.00 dB  
 PL12 20.23 dB  
 PL13 20.23 dB  
 SFO2 400.1320007 MHz

F2 - Processing parameters  
 SI 65536  
 SF 100.6127591 MHz  
 WDW EM  
 SSB 0  
 LB 2.00 Hz  
 GB 0  
 PC 1.40

1D NMR plot parameters  
 CX 20.00 cm  
 CY 9.94 cm  
 F1P 234.849 ppm  
 F1 23628.84 Hz  
 F2P -14.877 ppm  
 F2 -1496.79 Hz  
 PPMCM 12.48630 ppm/cm  
 HZCM 1256.28125 Hz/cm

djn-ii-99  
 CARBONSHORT\_ii\_tm\_bbo

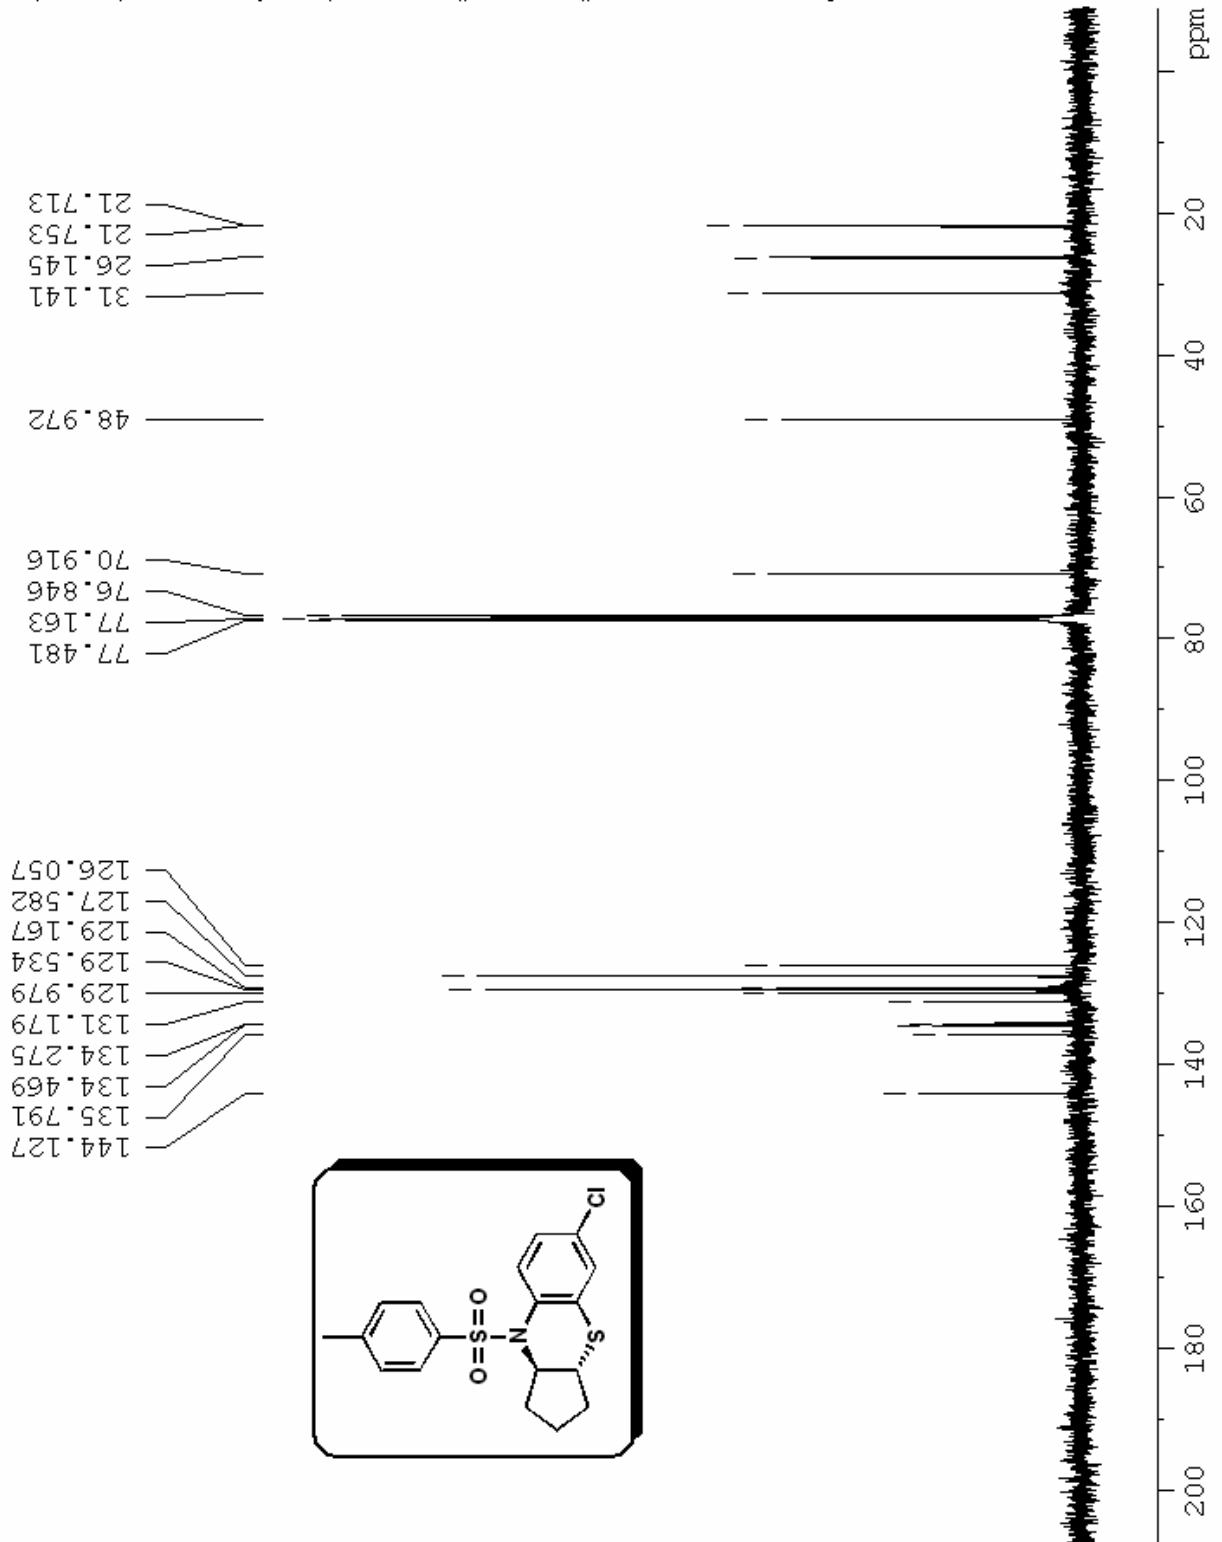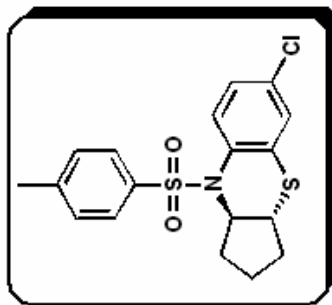

djn-ii-123  
 PROTON (-5to15)\_iitm\_bbo

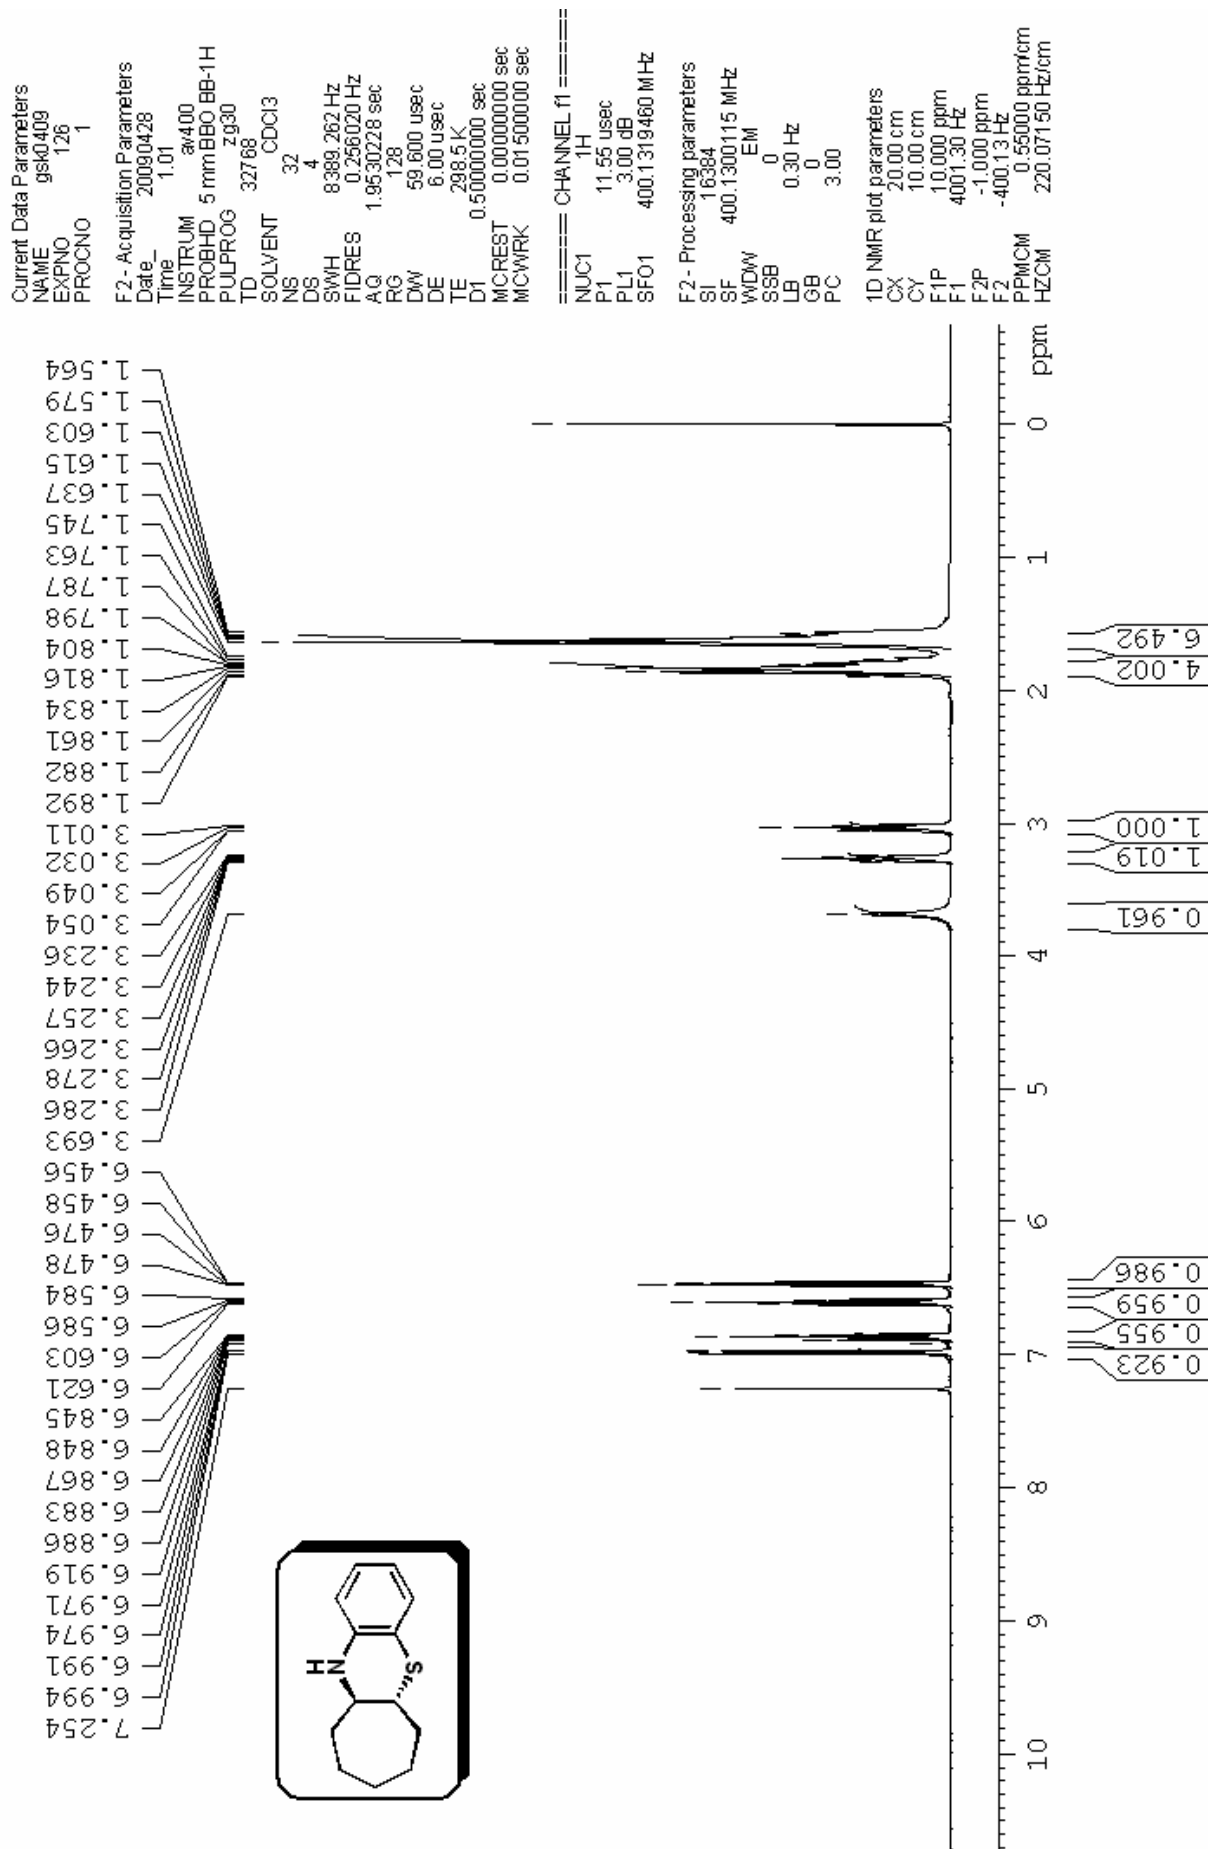

djn-ii-123  
CARBONSHORT\_iitm\_bbo

Current Data Parameters  
NAME gsk0509  
EXPNO 1  
PROCNO 1

F2 - Acquisition Parameters  
Date\_ 20090501  
Time 12.24  
INSTRUM av400  
PROBHD 5 mm BBO BB-1H  
PULPROG zgpg30  
TD 16384  
SOLVENT CDCI3  
NS 100  
DS 4  
SWH 25125.629 Hz  
FIDRES 1.533547 Hz  
AQ 0.3260816 sec  
RG 13004  
DMW 19.900 usec  
DE 6.00 usec  
TE 300.6 K  
d11 1.00000000 sec  
d1 0.03000000 sec  
MCREST 0.00000000 sec  
MCWRK 0.01500000 sec

==== CHANNEL f1 =====  
NUC1 13C  
P1 12.50 usec  
PL1 0.00 dB  
SFO1 100.6236364 MHz

==== CHANNEL f2 =====  
CPDPRG2 waltz16  
NUC2 1H  
PCPD2 80.00 usec  
PL2 3.00 dB  
PL12 19.81 dB  
PL13 20.23 dB  
SFO2 400.1320007 MHz

F2 - Processing parameters  
SI 65536  
SF 100.6127576 MHz  
WDW EM  
SSB 0  
LB 2.00 Hz  
GB 0  
PC 1.40

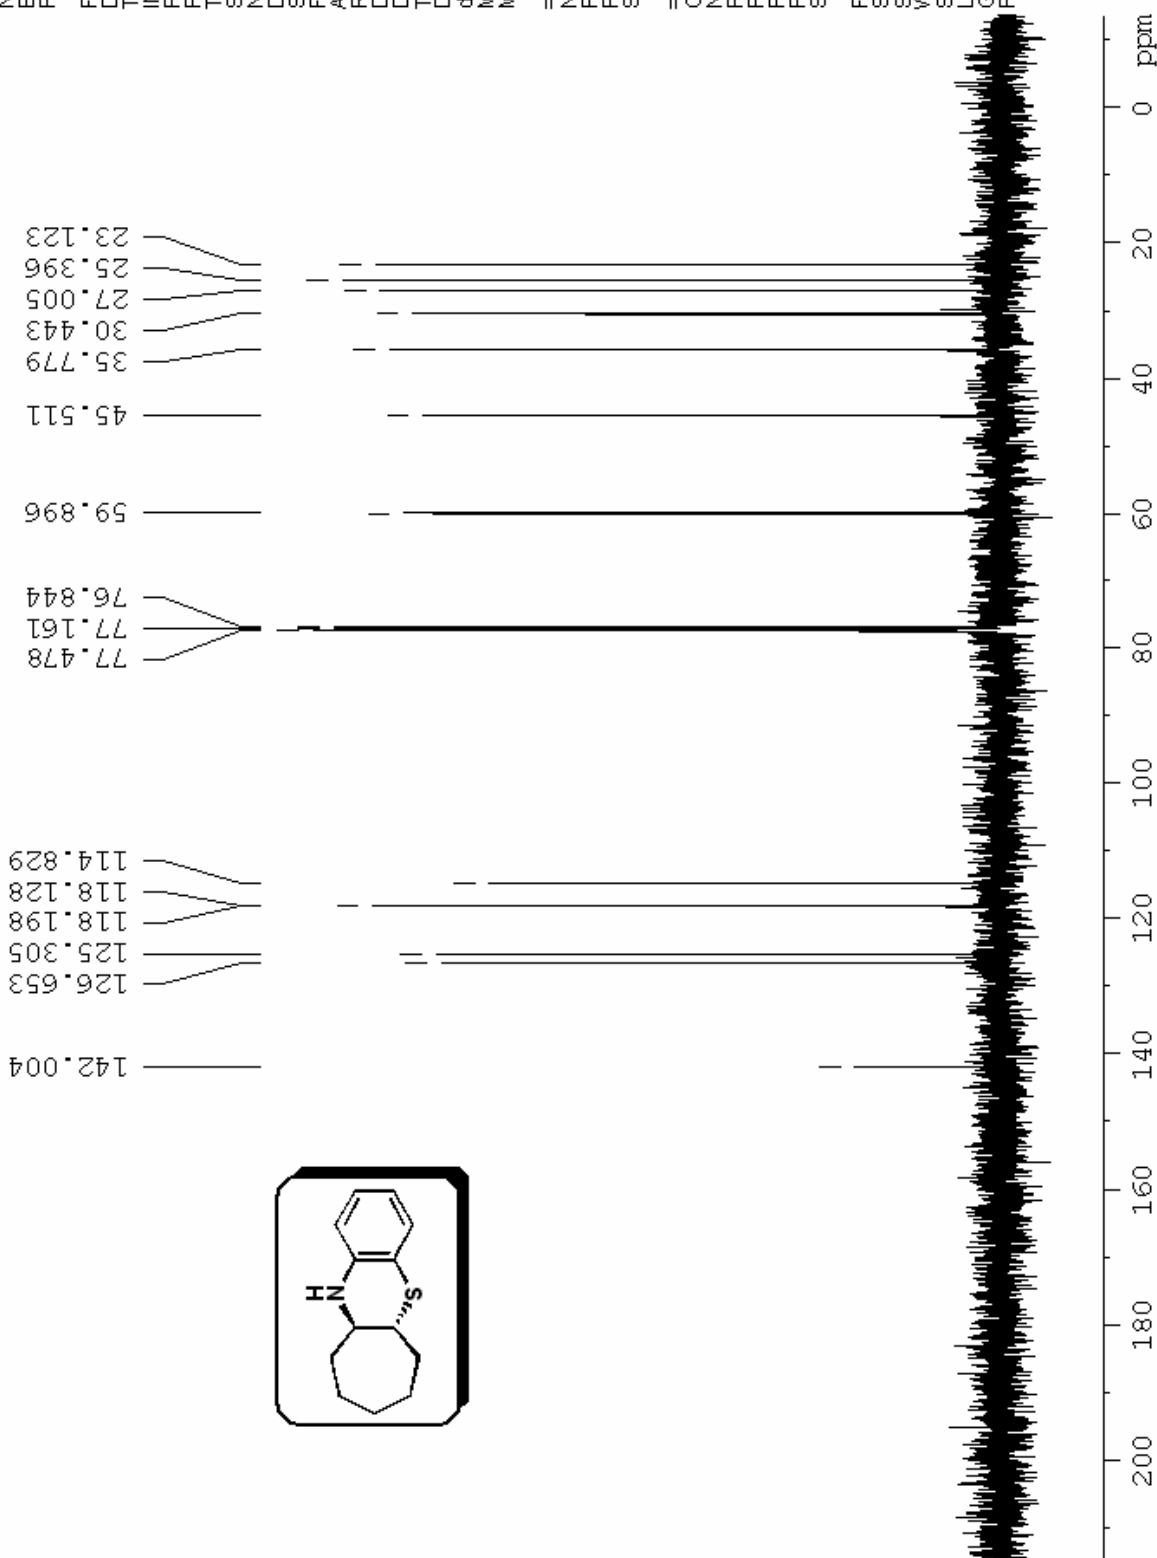

djn-ii-136  
 PROTON(-5to15)\_iitm\_bbo

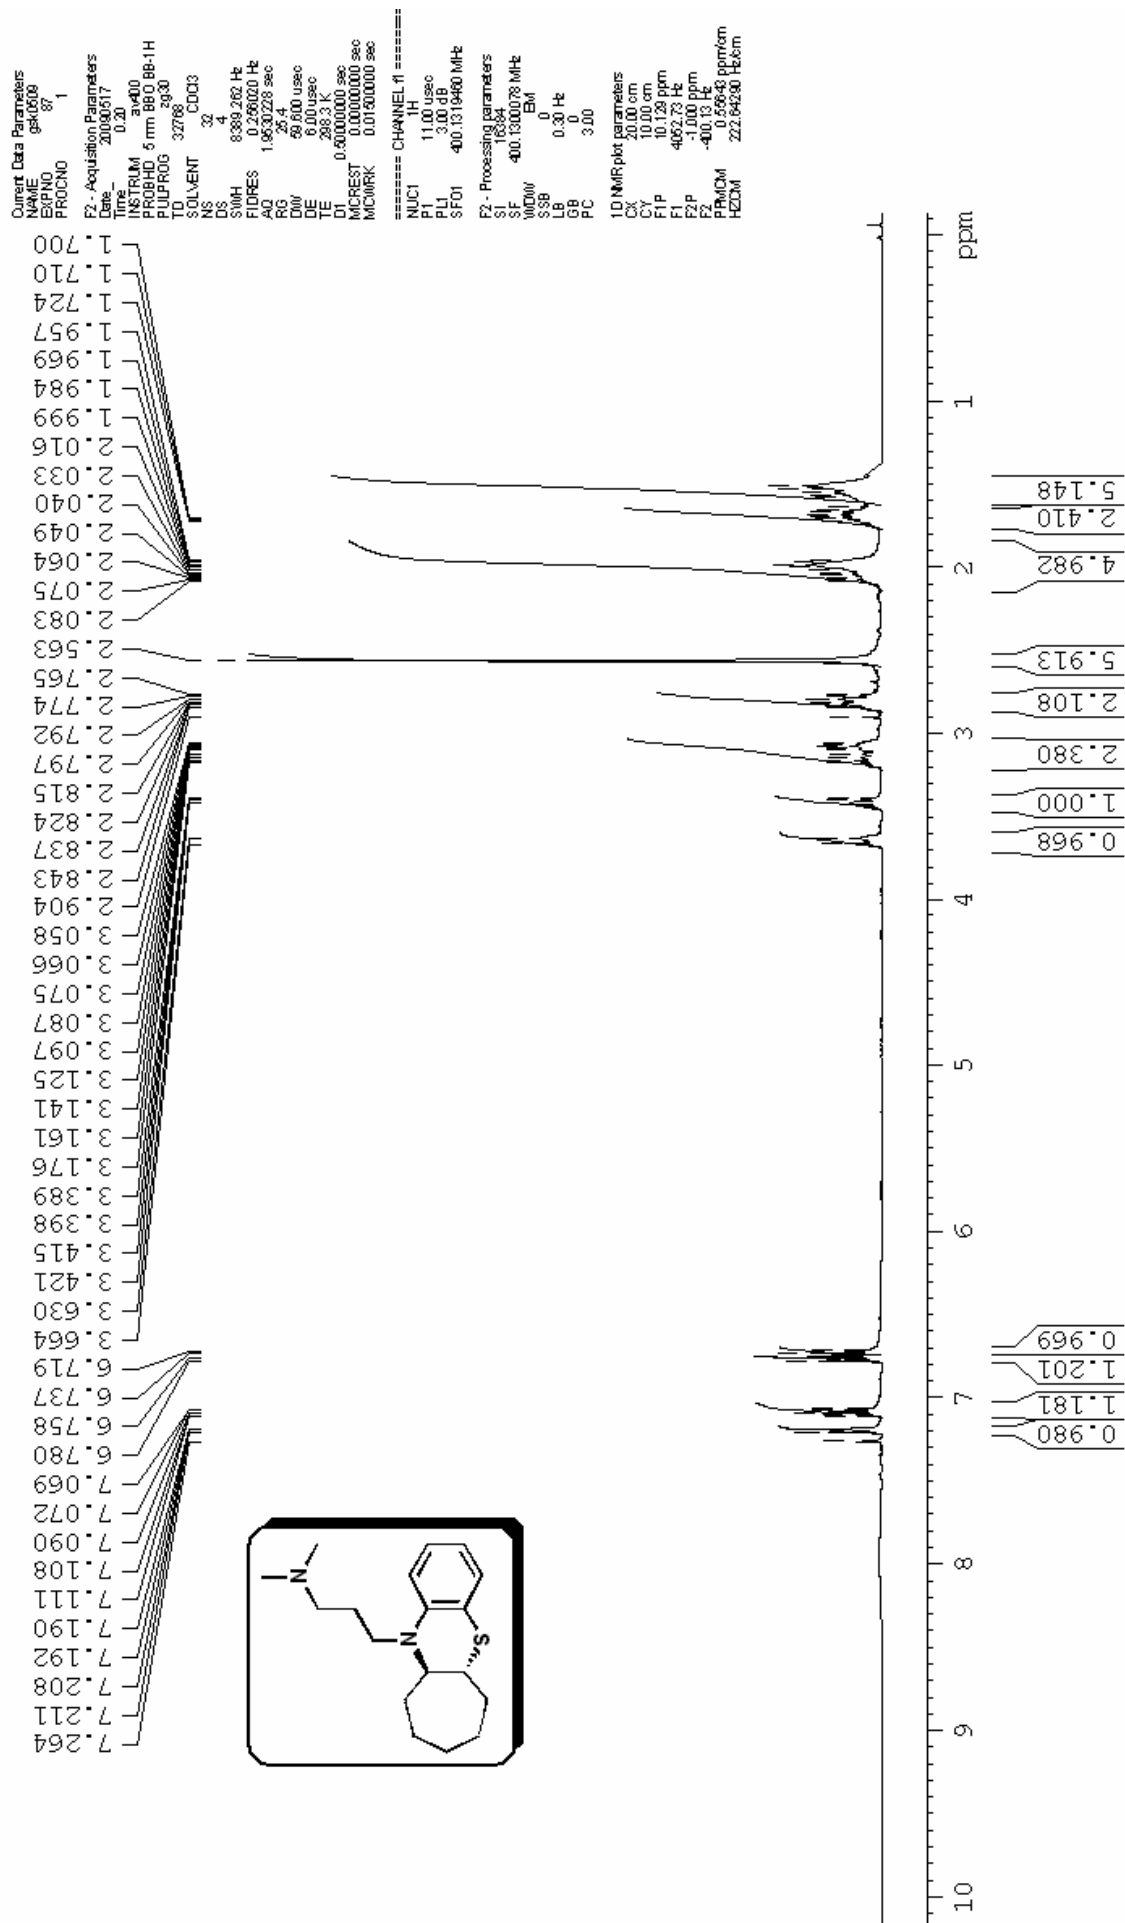



djn-ii-136  
CARBONSHORT\_ii\_tm\_bbo

Current Data Parameters  
NAME gsk0509  
EXPNO 88  
PROCNO 1

F2 - Acquisition Parameters  
Date\_ 20090517  
Time 0.24  
INSTRUM av400  
PROBHD 5 mm BBO BB-1H  
PULPROG zgpg30  
TD 16384  
SOLVENT CDCl3  
NS 125  
DS 4  
SWH 25125.629 Hz  
FIDRES 1.533547 Hz  
AQ 0.3260916 sec  
RG 18390.4  
DW 19.900 usec  
DE 6.00 usec  
TE 298.8 K  
D1 1.00000000 sec  
d11 0.03000000 sec  
MCREST 0.00000000 sec  
MCWRK 0.01500000 sec

==== CHANNEL f1 =====  
NUC1 13C  
P1 12.50 usec  
PL1 0.00 dB  
SFO1 100.6238364 MHz

==== CHANNEL f2 =====  
CPDPRG2 waltz16  
NUC2 1H  
PCPD2 80.00 usec  
PL2 3.00 dB  
PL12 19.81 dB  
PL13 20.23 dB  
SFO2 400.1320007 MHz

F2 - Processing parameters  
SI 65536  
SF 100.612706 MHz  
WDW EM  
SSB 0  
LB 2.00 Hz  
GB 0  
PC 1.40

1D NMR plot parameters  
CX 20.00 cm  
CY 9.94 cm  
F1P 234.849 ppm  
F1 23628.84 Hz  
F2P -14.877 ppm  
F2 -1496.79 Hz  
PPMCM 12.48630 ppm/cm  
HZCM 1256.28137 Hz/cm

21.980  
25.023  
25.503  
26.871  
31.340  
32.524  
43.114  
45.585  
51.716  
55.875  
69.252  
76.841  
77.159  
77.478  
117.875  
119.764  
127.098  
128.933  
129.139  
144.478

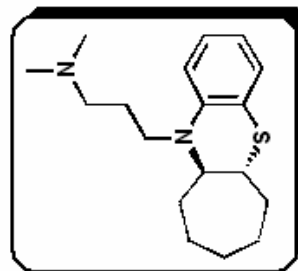

200 180 160 140 120 100 80 60 40 20 0 ppm

### Single crystal XRD data for Compound 10

Chemical formula : C<sub>18</sub>H<sub>19</sub>N<sub>1</sub>O<sub>2</sub>S<sub>2</sub>  
Formula weight : 345.46  
Symmetry cell setting : Monoclinic  
Symmetry space group name H-M : P2(1)/c  
Z : 4  
a (Å) : 13.5039(4)  
b (Å) : 12.3329(3)  
c (Å) : 10.3136(3)  
α (°) : 90.00  
β (°) : 95.7070(10)  
γ (°) : 90.00  
Cell volume : 1709.14(8) Å<sup>3</sup>  
Temperature : 298(2) K  
Exptl crystal description : Rectangular  
Exptl crystal colour : colourless  
Exptl absorpt correction type : multi-scan  
Exptl absorpt process details : SADABS (Bruker, 1999)  
Diffn measurement device type : Bruker Apex II CCD area detector  
Diffn measurement method : phi and omega scans  
Computing data collection : APEX II, Bruker, 2004  
Computing cell refinement : APEXII/SAINT (Bruker, 2004)  
Computing data reduction : SAINT/XPREP (Bruker, 2004)  
Computing molecular graphics : ORTEP3 (Farrugia, 1997) and Mercury (Bruno et al., 2002)  
Computing publication material : SHELXL-97 (Sheldrick, 1997)  
Reflns : 4974  
Theta min : 2.58  
Theta max : 28.03  
Crystal size max : 0.42  
Exptl crystal size mid : 0.28  
Exptl crystal size min : 0.22  
Crystal F(000) : 728

Absorpt coefficient : 0.320  
Absorpt correction T min : 0.8773  
Absorpt correction T max : 0.9329  
Absorpt process details : (SADABS, 1999)  
Radiation wavelength : 0.71073  
Radiation type : MoK $\alpha$   
Radiation source : fine-focus sealed tube  
Radiation monochromator : graphite  
Measurement device type : Bruker axs kappa apex2 CCD diffractometer  
Reflns number : 11807  
Rreflns R equivalents : 0.0189  
Reflns av sigmaI/netI : 0.0264  
Refine ls hydrogen treatment : constr  
Reflns total number : 4106  
Reflns gt number : 3009  
Reflns threshold expression : >2sigma(I)  
Refine ls number reflns : 4106  
Refine ls number parameters : 209  
Refine ls number restraints : 0  
Refine ls R factor all : 0.0629  
Refine ls wR factor : 0.1485

| <b><u>Bond length</u></b> | <b><u>angstroms</u></b> |
|---------------------------|-------------------------|
| C1 C5                     | 1.497(3)                |
| C1 C2                     | 1.522(3)                |
| C1 S2                     | 1.798(2)                |
| C1 H1                     | 0.9800                  |
| C2 C3                     | 1.542(3)                |
| C2 H2A                    | 0.9700                  |
| C2 H2B                    | 0.9700                  |
| C3 C4                     | 1.542(3)                |
| C3 H3A                    | 0.9700                  |
| C3 H3B                    | 0.9700                  |
| C4 C5                     | 1.518(3)                |
| C4 H4A                    | 0.9700                  |
| C4 H4B                    | 0.9700                  |
| C5 N1                     | 1.486(2)                |

|          |            |
|----------|------------|
| C5 H5    | 0.9800     |
| C6 C7    | 1.393(3)   |
| C6 C11   | 1.402(3)   |
| C6 N1    | 1.445(2)   |
| C7 C8    | 1.383(3)   |
| C7 H7    | 0.9300     |
| C8 C9    | 1.380(4)   |
| C8 H8    | 0.9300     |
| C9 C10   | 1.368(3)   |
| C9 H9    | 0.9300     |
| C10 C11  | 1.386(3)   |
| C10 H10  | 0.9300     |
| C11 S2   | 1.766(2)   |
| C12 C13  | 1.374(3)   |
| C12 C17  | 1.384(3)   |
| C12 S1   | 1.757(2)   |
| C13 C14  | 1.384(3)   |
| C13 H13  | 0.9300     |
| C14 C15  | 1.373(3)   |
| C14 H14  | 0.9300     |
| C15 C16  | 1.385(4)   |
| C15 C18  | 1.507(3)   |
| C16 C17  | 1.376(3)   |
| C16 H16  | 0.9300     |
| C17 H17  | 0.9300     |
| C18 H18A | 0.9600     |
| C18 H18B | 0.9600     |
| C18 H18C | 0.9600     |
| N1 S1    | 1.6661(16) |
| O1 S1    | 1.4230(15) |
| O2 S1    | 1.4282(15) |

**Bond Angles**                      **(degrees)**

|            |            |
|------------|------------|
| C5 C1 C2   | 102.37(17) |
| C5 C1 S2   | 111.19(15) |
| C2 C1 S2   | 116.73(16) |
| C5 C1 H1   | 108.7      |
| C2 C1 H1   | 108.7      |
| S2 C1 H1   | 108.7      |
| C1 C2 C3   | 104.37(17) |
| C1 C2 H2A  | 110.9      |
| C3 C2 H2A  | 110.9      |
| C1 C2 H2B  | 110.9      |
| C3 C2 H2B  | 110.9      |
| H2A C2 H2B | 108.9      |
| C4 C3 C2   | 106.03(17) |

|             |            |
|-------------|------------|
| C4 C3 H3A   | 110.5      |
| C2 C3 H3A   | 110.5      |
| C4 C3 H3B   | 110.5      |
| C2 C3 H3B   | 110.5      |
| H3A C3 H3B  | 108.7      |
| C5 C4 C3    | 101.51(18) |
| C5 C4 H4A   | 111.5      |
| C3 C4 H4A   | 111.5      |
| C5 C4 H4B   | 111.5      |
| C3 C4 H4B   | 111.5      |
| H4A C4 H4B  | 109.3      |
|             |            |
| N1 C5 C1    | 113.77(16) |
| N1 C5 C4    | 117.63(17) |
| C1 C5 C4    | 102.31(17) |
| N1 C5 H5    | 107.5      |
| C1 C5 H5    | 107.5      |
| C4 C5 H5    | 107.5      |
| C7 C6 C11   | 118.78(18) |
| C7 C6 N1    | 118.46(17) |
| C11 C6 N1   | 122.73(16) |
| C8 C7 C6    | 120.6(2)   |
| C8 C7 H7    | 119.7      |
| C6 C7 H7    | 119.7      |
| C9 C8 C7    | 119.8(2)   |
| C9 C8 H8    | 120.1      |
| C7 C8 H8    | 120.1      |
| C10 C9 C8   | 120.2(2)   |
| C10 C9 H9   | 119.9      |
| C8 C9 H9    | 119.9      |
| C9 C10 C11  | 120.9(2)   |
| C9 C10 H10  | 119.5      |
| C11 C10 H10 | 119.5      |
| C10 C11 C6  | 119.40(18) |
| C10 C11 S2  | 118.73(16) |
| C6 C11 S2   | 121.78(15) |
| C13 C12 C17 | 120.2(2)   |
| C13 C12 S1  | 119.67(15) |
| C17 C12 S1  | 120.14(17) |
| C12 C13 C14 | 119.7(2)   |
| C12 C13 H13 | 120.1      |
| C14 C13 H13 | 120.1      |
| C15 C14 C13 | 121.1(2)   |
| C15 C14 H14 | 119.5      |
| C13 C14 H14 | 119.5      |
| C14 C15 C16 | 118.3(2)   |
| C14 C15 C18 | 120.1(3)   |
| C16 C15 C18 | 121.6(2)   |

|               |            |
|---------------|------------|
| C17 C16 C15   | 121.6(2)   |
| C17 C16 H16   | 119.2      |
| C15 C16 H16   | 119.2      |
| C16 C17 C12   | 119.1(2)   |
| C16 C17 H17   | 120.4      |
| C12 C17 H17   | 120.4      |
| C15 C18 H18A  | 109.5      |
| C15 C18 H18B  | 109.5      |
| H18A C18 H18B | 109.5      |
| C15 C18 H18C  | 109.5      |
| H18A C18 H18C | 109.5      |
| <br>          |            |
| H18B C18 H18C | 109.5      |
| C6 N1 C5      | 119.24(14) |
| C6 N1 S1      | 115.03(12) |
| C5 N1 S1      | 112.27(13) |
| O1 S1 O2      | 119.64(9)  |
| O1 S1 N1      | 106.14(9)  |
| O2 S1 N1      | 107.85(9)  |
| O1 S1 C12     | 108.13(10) |
| O2 S1 C12     | 108.23(10) |
| N1 S1 C12     | 106.08(8)  |
| C11 S2 C1     | 94.23(9)   |

**Bond Angles**                      **(degrees)**

|                 |             |
|-----------------|-------------|
| C5 C1 C2 C3     | -32.0(2)    |
| S2 C1 C2 C3     | -153.66(17) |
| C1 C2 C3 C4     | 4.7(3)      |
| C2 C3 C4 C5     | 23.9(2)     |
| C2 C1 C5 N1     | 175.94(17)  |
| S2 C1 C5 N1     | -58.7(2)    |
| C2 C1 C5 C4     | 48.0(2)     |
| S2 C1 C5 C4     | 173.38(15)  |
| C3 C4 C5 N1     | -169.71(19) |
| C3 C4 C5 C1     | -44.3(2)    |
| C11 C6 C7 C8    | 6.3(3)      |
| N1 C6 C7 C8     | -171.85(19) |
| C6 C7 C8 C9     | -2.8(3)     |
| C7 C8 C9 C10    | -2.3(4)     |
| C8 C9 C10 C11   | 3.8(4)      |
| C9 C10 C11 C6   | -0.1(3)     |
| C9 C10 C11 S2   | -176.77(19) |
| C7 C6 C11 C10   | -4.8(3)     |
| N1 C6 C11 C10   | 173.23(18)  |
| C7 C6 C11 S2    | 171.69(15)  |
| N1 C6 C11 S2    | -10.3(3)    |
| C17 C12 C13 C14 | 0.4(3)      |

|                 |             |
|-----------------|-------------|
| S1 C12 C13 C14  | -177.86(17) |
| C12 C13 C14 C15 | 0.7(4)      |
| C13 C14 C15 C16 | -0.8(4)     |
| C13 C14 C15 C18 | 178.6(2)    |
| C14 C15 C16 C17 | -0.1(4)     |
| C18 C15 C16 C17 | -179.6(2)   |
| C15 C16 C17 C12 | 1.2(4)      |
| C13 C12 C17 C16 | -1.3(3)     |
| S1 C12 C17 C16  | 176.92(18)  |
| C7 C6 N1 C5     | -156.07(18) |
| C11 C6 N1 C5    | 25.9(3)     |
|                 |             |
| C7 C6 N1 S1     | 66.1(2)     |
| C11 C6 N1 S1    | -111.93(18) |
| C1 C5 N1 C6     | 11.0(2)     |
| C4 C5 N1 C6     | 130.6(2)    |
| C1 C5 N1 S1     | 149.88(15)  |
| C4 C5 N1 S1     | -90.6(2)    |
| C6 N1 S1 O1     | -174.62(13) |
| C5 N1 S1 O1     | 44.68(15)   |
| C6 N1 S1 O2     | -45.27(15)  |
| C5 N1 S1 O2     | 174.04(13)  |
| C6 N1 S1 C12    | 70.51(14)   |
| C5 N1 S1 C12    | -70.19(14)  |
| C13 C12 S1 O1   | -11.5(2)    |
| C17 C12 S1 O1   | 170.21(16)  |
| C13 C12 S1 O2   | -142.51(17) |
| C17 C12 S1 O2   | 39.24(19)   |
| C13 C12 S1 N1   | 101.97(18)  |
| C17 C12 S1 N1   | -76.28(18)  |
| C10 C11 S2 C1   | 146.45(18)  |
| C6 C11 S2 C1    | -30.09(18)  |
| C5 C1 S2 C11    | 62.77(16)   |
| C2 C1 S2 C11    | 179.68(18)  |

### Single crystal XRD data for Compound 9

|                               |                                                                                |
|-------------------------------|--------------------------------------------------------------------------------|
| Chemical formula              | : C <sub>19</sub> H <sub>21</sub> N <sub>1</sub> O <sub>2</sub> S <sub>2</sub> |
| Formula weight                | : 359.49                                                                       |
| Symmetry cell setting         | : Monoclinic                                                                   |
| Symmetry space group name H-M | : P 21/c                                                                       |
| Z                             | : 4                                                                            |
| a (Å)                         | : 14.6365(4)                                                                   |
| b (Å)                         | : 12.8539(3)                                                                   |

c (Å) : 9.8406(3)  
α (°) : 90.00  
β (°) : 97.7590(10)  
γ (°) : 90.00  
Cell volume : 1834.42(9) Å<sup>3</sup>  
Temperature : 298(2) K  
Exptl crystal description : Block  
Exptl crystal colour : Colourless  
Exptl absorpt correction type : Multi-scan  
Exptl absorpt process details : SADABS (Bruker, 1999)  
Crystal size max : 0.38  
Exptl crystal size mid : 0.35  
Exptl crystal size min : 0.15  
Diffn measurement device type : Bruker Apex II CCD area detector  
Diffn measurement method : Phi and omega scans  
Computing data collection : APEX II, Bruker, 2004  
Computing cell refinement : APEXII/SAINT (Bruker, 2004)  
Computing data reduction : SAINT/XPREP (Bruker, 2004)  
Computing molecular graphics : ORTEP3 (Farrugia, 1997) and Mercury (Bruno et al., 2002)  
Computing publication material : SHELXL-97 (Sheldrick, 1997)  
Crystal F(000) : 760  
Absorpt coefficient : 0.301  
Absorpt correction T min : 0.8942  
Absorpt correction T max : 0.9562  
Absorpt process details : (SADABS, 1999)  
Radiation wavelength : 0.71073  
Radiation type : MoK $\alpha$   
Radiation source : fine-focus sealed tube  
Radiation monochromator : graphite  
Measurement device type : Bruker axs kappa apex2 CCD diffractometer  
Reflns number : 14118  
Rreflns R equivalents : 0.0242



Reflns av sigmaI/netI : 0.0297  
Refine ls hydrogen treatment : constr  
Reflns total number : 4396  
Reflns gt number : 3219  
Reflns threshold expression : >2sigma(I)  
Refine ls number reflns : 4396  
Refine ls number parameters : 218  
Refine ls number restraints : 0  
Refine ls R factor all : 0.0641  
Refine ls wR factor : 0.1456

| <u>Bond length</u> | <u>angstroms</u> |
|--------------------|------------------|
| C1 N1              | 1.498(2)         |
| C1 C6              | 1.514(2)         |
| C1 C2              | 1.525(2)         |
| C1 H1              | 0.9800           |
| C2 C3              | 1.525(3)         |
| C2 H2A             | 0.9700           |
| C2 H2B             | 0.9700           |
| C3 C4              | 1.518(3)         |
| C3 H3A             | 0.9700           |
| C3 H3B             | 0.9700           |
| C4 C5              | 1.515(3)         |
| C4 H4A             | 0.9700           |
| C4 H4B             | 0.9700           |
| C5 C6              | 1.523(3)         |
| C5 H5A             | 0.9700           |
| C5 H5B             | 0.9700           |
| C6 S1              | 1.8112(18)       |
| C6 H6              | 0.9800           |
| C7 C8              | 1.391(2)         |
| C7 C12             | 1.393(3)         |
| C7 S1              | 1.7641(19)       |
| C8 C9              | 1.381(3)         |
| C8 H8              | 0.9300           |
| C9 C10             | 1.370(4)         |
| C9 H9              | 0.9300           |
| C10 C11            | 1.377(3)         |
| C10 H10            | 0.9300           |
| C11 C12            | 1.396(3)         |
| C11 H11            | 0.9300           |

|          |            |
|----------|------------|
| C12 N1   | 1.442(2)   |
| C13 C14  | 1.381(3)   |
| C13 C18  | 1.389(3)   |
| C13 S2   | 1.759(2)   |
| C14 C15  | 1.378(3)   |
| C14 H14  | 0.9300     |
| C15 C16  | 1.375(4)   |
| C15 H15  | 0.9300     |
| C16 C17  | 1.395(4)   |
| C16 C19  | 1.514(4)   |
| C17 C18  | 1.373(3)   |
| C17 H17  | 0.9300     |
| C18 H18  | 0.9300     |
| C19 H19A | 0.9600     |
| C19 H19B | 0.9600     |
| C19 H19C | 0.9600     |
| N1 S2    | 1.6634(16) |
| O1 S2    | 1.4251(15) |
| O2 S2    | 1.4264(16) |

| <b><u>Bond Angles</u></b> | <b><u>(degrees)</u></b> |
|---------------------------|-------------------------|
| N1 C1 C6                  | 112.71(13)              |
| N1 C1 C2                  | 111.59(15)              |
| C6 C1 C2                  | 109.35(15)              |
| N1 C1 H1                  | 107.7                   |
| C6 C1 H1                  | 107.7                   |
| C2 C1 H1                  | 107.7                   |
| C3 C2 C1                  | 110.04(18)              |
| C3 C2 H2A                 | 109.7                   |
| C1 C2 H2A                 | 109.7                   |
| C3 C2 H2B                 | 109.7                   |
| C1 C2 H2B                 | 109.7                   |
| H2A C2 H2B                | 108.2                   |
| C4 C3 C2                  | 112.31(18)              |
| C4 C3 H3A                 | 109.1                   |
| C2 C3 H3A                 | 109.1                   |
| C4 C3 H3B                 | 109.1                   |
| C2 C3 H3B                 | 109.1                   |
| H3A C3 H3B                | 107.9                   |
| C5 C4 C3                  | 111.85(18)              |
| C5 C4 H4A                 | 109.2                   |
| C3 C4 H4A                 | 109.2                   |
| C5 C4 H4B                 | 109.2                   |
| C3 C4 H4B                 | 109.2                   |
| H4A C4 H4B                | 107.9                   |
| C4 C5 C6                  | 109.99(18)              |
| C4 C5 H5A                 | 109.7                   |

|              |            |
|--------------|------------|
| C6 C5 H5A    | 109.7      |
| C4 C5 H5B    | 109.7      |
| C6 C5 H5B    | 109.7      |
| H5A C5 H5B   | 108.2      |
| C1 C6 C5     | 109.22(15) |
| C1 C6 S1     | 110.73(12) |
| C5 C6 S1     | 111.74(14) |
| C1 C6 H6     | 108.4      |
| C5 C6 H6     | 108.4      |
| S1 C6 H6     | 108.4      |
| C8 C7 C12    | 119.94(18) |
| C8 C7 S1     | 120.62(16) |
| C12 C7 S1    | 119.36(13) |
| C9 C8 C7     | 119.3(2)   |
| C9 C8 H8     | 120.3      |
| C7 C8 H8     | 120.3      |
| C10 C9 C8    | 120.9(2)   |
| C10 C9 H9    | 119.5      |
| C8 C9 H9     | 119.5      |
| C9 C10 C11   | 120.3(2)   |
| C9 C10 H10   | 119.8      |
| C11 C10 H10  | 119.8      |
| C10 C11 C12  | 119.8(2)   |
| C10 C11 H11  | 120.1      |
| C12 C11 H11  | 120.1      |
| C7 C12 C11   | 119.53(18) |
| C7 C12 N1    | 121.25(16) |
| C11 C12 N1   | 119.13(17) |
| C14 C13 C18  | 120.5(2)   |
| C14 C13 S2   | 19.67(14)  |
| C18 C13 S2   | 119.65(16) |
| C15 C14 C13  | 119.4(2)   |
| C15 C14 H14  | 120.3      |
| C13 C14 H14  | 120.3      |
| C16 C15 C14  | 121.3(2)   |
| C16 C15 H15  | 119.3      |
| C14 C15 H15  | 119.3      |
| C15 C16 C17  | 118.5(2)   |
| C15 C16 C19  | 120.5(3)   |
| C17 C16 C19  | 121.0(3)   |
| C18 C17 C16  | 121.3(2)   |
| C18 C17 H17  | 119.4      |
| C16 C17 H17  | 119.4      |
| C17 C18 C13  | 119.0(2)   |
| C17 C18 H18  | 120.5      |
| C13 C18 H18  | 120.5      |
| C16 C19 H19A | 109.5      |
| C16 C19 H19B | 109.5      |

|               |            |
|---------------|------------|
| H19A C19 H19B | 109.5      |
| C16 C19 H19C  | 109.5      |
| H19A C19 H19C | 109.5      |
| H19B C19 H19C | 109.5      |
| C12 N1 C1     | 120.68(14) |
| C12 N1 S2     | 114.65(12) |
| C1 N1 S2      | 114.37(12) |
| C7 S1 C6      | 94.73(9)   |
| O1 S2 O2      | 120.01(10) |
| O1 S2 N1      | 106.46(9)  |
| O2 S2 N1      | 107.14(9)  |
| O1 S2 C13     | 108.55(10) |
| O2 S2 C13     | 108.02(9)  |
| N1 S2 C13     | 105.82(8)  |

**Bond Angles**                      **(degrees)**

|                 |             |
|-----------------|-------------|
| N1 C1 C2 C3     | 175.60(17)  |
| C6 C1 C2 C3     | -59.0(2)    |
| C1 C2 C3 C4     | 53.6(3)     |
| C2 C3 C4 C5     | -52.1(3)    |
| C3 C4 C5 C6     | 55.1(3)     |
| N1 C1 C6 C5     | -172.37(15) |
| C2 C1 C6 C5     | 62.9(2)     |
| N1 C1 C6 S1     | -48.91(18)  |
| C2 C1 C6 S1     | -173.64(14) |
| C4 C5 C6 C1     | -60.7(2)    |
| C4 C5 C6 S1     | 176.49(15)  |
| C12 C7 C8 C9    | -0.2(3)     |
| S1 C7 C8 C9     | -177.13(17) |
| C7 C8 C9 C10    | 2.1(4)      |
| C8 C9 C10 C11   | -1.5(4)     |
| C9 C10 C11 C12  | -0.9(3)     |
| C8 C7 C12 C11   | -2.2(3)     |
| S1 C7 C12 C11   | 174.73(15)  |
| C8 C7 C12 N1    | 174.49(17)  |
| S1 C7 C12 N1    | -8.6(2)     |
| C10 C11 C12 C7  | 2.8(3)      |
| C10 C11 C12 N1  | -173.96(18) |
| C18 C13 C14 C15 | -0.2(3)     |
| S2 C13 C14 C15  | -175.71(17) |
| C13 C14 C15 C16 | 0.9(3)      |
| C14 C15 C16 C17 | -1.1(4)     |
| C14 C15 C16 C19 | 179.2(2)    |
| C15 C16 C17 C18 | 0.5(4)      |
| C19 C16 C17 C18 | -179.7(3)   |

|                 |             |
|-----------------|-------------|
| C16 C17 C18 C13 | 0.1(4)      |
| C14 C13 C18 C17 | -0.3(3)     |
| S2 C13 C18 C17  | 175.20(17)  |
| C7 C12 N1 C1    | 37.6(2)     |
| C11 C12 N1 C1   | -145.72(18) |
| C7 C12 N1 S2    | -105.56(17) |
| C11 C12 N1 S2   | 71.13(19)   |
| C6 C1 N1 C12    | -4.9(2)     |
| C2 C1 N1 C12    | 118.64(17)  |
| C6 C1 N1 S2     | 138.39(13)  |
| C2 C1 N1 S2     | -98.12(16)  |
| C8 C7 S1 C6     | 139.76(17)  |
| C12 C7 S1 C6    | -37.14(16)  |
| C1 C6 S1 C7     | 65.29(14)   |
| C5 C6 S1 C7     | -172.72(14) |
| C12 N1 S2 O1    | -177.35(13) |
| C1 N1 S2 O1     | 37.13(14)   |
| C12 N1 S2 O2    | -47.80(15)  |
| C1 N1 S2 O2     | 166.69(12)  |
| C12 N1 S2 C13   | 67.28(14)   |
| C1 N1 S2 C13    | -78.24(13)  |
| C14 C13 S2 O1   | -17.17(18)  |
| C18 C13 S2 O1   | 167.28(16)  |
| C14 C13 S2 O2   | -148.76(16) |
| C18 C13 S2 O2   | 35.68(18)   |
| C14 C13 S2 N1   | 96.76(16)   |
| C18 C13 S2 N1   | -78.79(17)  |

### Single crystal XRD data for Compound 11

|                           |                                                                                |
|---------------------------|--------------------------------------------------------------------------------|
| Chemical formula          | : C <sub>20</sub> H <sub>23</sub> N <sub>1</sub> O <sub>2</sub> S <sub>2</sub> |
| Formula weight            | : 373.51                                                                       |
| Symmetry cell setting     | : Triclinic                                                                    |
| Symmetry space group name | : H-M 'P-1'                                                                    |
| Z                         | : 2                                                                            |
| a (Å)                     | : 7.6290(15)                                                                   |
| b (Å)                     | : 11.646(2)                                                                    |
| c (Å)                     | : 11.722(2)                                                                    |
| α (°)                     | : 115.05(3)                                                                    |
| β (°)                     | : 92.13(3)                                                                     |
| γ (°)                     | : 92.44(3)                                                                     |
| Cell volume               | : 940.9(3) Å <sup>3</sup>                                                      |
| Temperature               | : 298(2) K                                                                     |

Exptl crystal description : Rectangular  
Exptl crystal colour : colourless  
Exptl absorpt correction type : Multi-scan  
Exptl absorpt process details : SADABS (Bruker, 1999)  
Crystal size max : 0.23  
Exptl crystal size mid : 0.22  
Exptl crystal size min : 0.15  
Diffn measurement device type : Bruker Apex II CCD area detector  
Diffn measurement method : phi and omega scans  
Computing data collection : APEX II, Bruker, 2004  
Computing cell refinement : APEXII/SAINT (Bruker, 2004)  
Computing data reduction : SAINT/XPREP (Bruker, 2004)  
Computing molecular graphics : ORTEP3 (Farrugia, 1997) and Mercury (Bruno et al., 2002)  
Computing publication material : SHELXL-97 (Sheldrick, 1997)  
Crystal F(000) : 396  
Absorpt coefficient : 0.296  
Absorpt correction T min : 0.9350  
Absorpt correction T max : 0.9569  
Absorpt process details : (SADABS, 1999)  
Radiation wavelength : 0.71073  
Radiation type : MoK $\alpha$   
Radiation source : fine-focus sealed tube  
Radiation monochromator : graphite  
Measurement device type : Bruker axs kappa apex2 CCD diffractometer  
Reflns number : 15094  
Reflns R equivalents : 0.0336  
Reflns av sigmaI/netI : 0.0500  
Refine ls hydrogen treatment : constr  
Reflns total number : 5309  
Reflns gt number : 3377  
Reflns threshold expression : >2sigma(I)  
Refine ls number reflns : 5309

Refine ls number parameters : 227  
Refine ls number restraints : 0  
Refine ls R factor all : 0.0962  
Refine ls wR factor : 0.1750

| <b><u>Bond length</u></b> | <b><u>angstroms</u></b> |
|---------------------------|-------------------------|
| C1 C2                     | 1.526(3)                |
| C1 C7                     | 1.545(3)                |
| C1 S1                     | 1.811(3)                |
| C1 H1                     | 0.9800                  |
| C2 C3                     | 1.514(5)                |
| C2 H2A                    | 0.9700                  |
| C2 H2B                    | 0.9700                  |
| C3 C4                     | 1.440(5)                |
| C3 H3A                    | 0.9700                  |
| C3 H3B                    | 0.9700                  |
| C4 C5                     | 1.449(5)                |
| C4 H4A                    | 0.9700                  |
| C4 H4B                    | 0.9700                  |
| C5 C6                     | 1.510(4)                |
| C5 H5A                    | 0.9700                  |
| C5 H5B                    | 0.9700                  |
| C6 C7                     | 1.523(3)                |
| C6 H6A                    | 0.9700                  |
| C6 H6B                    | 0.9700                  |
| C7 N1                     | 1.488(3)                |
| C7 H7                     | 0.9800                  |
| C8 C13                    | 1.396(3)                |
| C8 C9                     | 1.398(3)                |
| C8 N1                     | 1.435(3)                |
| C9 C10                    | 1.379(4)                |
| C9 H9                     | 0.9300                  |
| C10 C11                   | 1.392(5)                |
| C10 H10                   | 0.9300                  |
| C11 C12                   | 1.367(4)                |
| C11 H11                   | 0.9300                  |
| C12 C13                   | 1.396(4)                |
| C12 H12                   | 0.9300                  |
| C13 S1                    | 1.760(3)                |
| C14 C19                   | 1.376(3)                |
| C14 C15                   | 1.378(3)                |
| C14 S2                    | 1.761(2)                |
| C15 C16                   | 1.375(4)                |
| C15 H15                   | 0.9300                  |
| C16 C17                   | 1.380(4)                |
| C16 H16                   | 0.9300                  |

|          |            |
|----------|------------|
| C17 C18  | 1.389(4)   |
| C17 C20  | 1.520(3)   |
| C18 C19  | 1.370(3)   |
| C18 H18  | 0.9300     |
| C19 H19  | 0.9300     |
| C20 H20A | 0.9600     |
| C20 H20B | 0.9600     |
| C20 H20C | 0.9600     |
| N1 S2    | 1.6528(18) |
| O1 S2    | 1.4306(18) |
| O2 S2    | 1.4308(18) |

**Bond Angles**                      **(degrees)**

|            |            |
|------------|------------|
| C2 C1 C7   | 111.8(2)   |
| C2 C1 S1   | 107.13(16) |
| C7 C1 S1   | 112.37(16) |
| C2 C1 H1   | 108.5      |
| C7 C1 H1   | 108.5      |
| S1 C1 H1   | 108.5      |
| C3 C2 C1   | 115.9(2)   |
| C3 C2 H2A  | 108.3      |
| C1 C2 H2A  | 108.3      |
| C3 C2 H2B  | 108.3      |
| C1 C2 H2B  | 108.3      |
| H2A C2 H2B | 107.4      |
| C4 C3 C2   | 120.9(3)   |
| C4 C3 H3A  | 107.1      |
| C2 C3 H3A  | 107.1      |
| C4 C3 H3B  | 107.1      |
| C2 C3 H3B  | 107.1      |
| H3A C3 H3B | 106.8      |
| C3 C4 C5   | 122.0(4)   |
| C3 C4 H4A  | 106.8      |
| C5 C4 H4A  | 106.8      |
| C3 C4 H4B  | 106.8      |
| C5 C4 H4B  | 106.8      |
| H4A C4 H4B | 106.7      |
| C4 C5 C6   | 121.2(3)   |
| C4 C5 H5A  | 107.0      |
| C6 C5 H5A  | 107.0      |
| C4 C5 H5B  | 107.0      |
| C6 C5 H5B  | 107.0      |
| H5A C5 H5B | 106.8      |
| C5 C6 C7   | 117.9(2)   |
| C5 C6 H6A  | 107.8      |
| C7 C6 H6A  | 107.8      |
| C5 C6 H6B  | 107.8      |



|               |            |
|---------------|------------|
| C7 C6 H6B     | 107.8      |
| H6A C6 H6B    | 107.2      |
| N1 C7 C6      | 107.34(18) |
| N1 C7 C1      | 113.95(18) |
| C6 C7 C1      | 112.80(19) |
| N1 C7 H7      | 107.5      |
| C6 C7 H7      | 107.5      |
| C1 C7 H7      | 107.5      |
| C13 C8 C9     | 119.8(2)   |
| C13 C8 N1     | 119.1(2)   |
| C9 C8 N1      | 121.2(2)   |
| C10 C9 C8     | 119.8(3)   |
| C10 C9 H9     | 120.1      |
| C8 C9 H9      | 120.1      |
| C9 C10 C11    | 120.3(3)   |
| C9 C10 H10    | 119.8      |
| C11 C10 H10   | 119.8      |
| C12 C11 C10   | 120.0(3)   |
| C12 C11 H11   | 120.0      |
| C10 C11 H11   | 120.0      |
| C11 C12 C13   | 120.8(3)   |
| C11 C12 H12   | 119.6      |
| C13 C12 H12   | 119.6      |
| C8 C13 C12    | 119.2(3)   |
| C8 C13 S1     | 118.46(19) |
| C12 C13 S1    | 122.3(2)   |
| C19 C14 C15   | 120.1(2)   |
| C19 C14 S2    | 119.70(17) |
| C15 C14 S2    | 120.17(18) |
| C16 C15 C14   | 119.4(2)   |
| C16 C15 H15   | 120.3      |
| C14 C15 H15   | 120.3      |
| C15 C16 C17   | 121.4(2)   |
| C15 C16 H16   | 119.3      |
| C17 C16 H16   | 119.3      |
| C16 C17 C18   | 118.1(2)   |
| C16 C17 C20   | 121.5(3)   |
| C18 C17 C20   | 120.3(3)   |
| C19 C18 C17   | 120.9(2)   |
| C19 C18 H18   | 119.5      |
| C17 C18 H18   | 119.5      |
| C18 C19 C14   | 120.0(2)   |
| C18 C19 H19   | 120.0      |
| C14 C19 H19   | 120.0      |
| C17 C20 H20A  | 109.5      |
| C17 C20 H20B  | 109.5      |
| H20A C20 H20B | 109.5      |
| C17 C20 H20C  | 109.5      |

|               |            |
|---------------|------------|
| H20A C20 H20C | 109.5      |
| H20B C20 H20C | 109.5      |
| C8 N1 C7      | 120.00(16) |
| C8 N1 S2      | 117.17(15) |
| C7 N1 S2      | 118.28(14) |
| C13 S1 C1     | 96.60(11)  |
| O1 S2 O2      | 120.23(11) |
| O1 S2 N1      | 106.29(10) |
| O2 S2 N1      | 107.10(10) |
| O1 S2 C14     | 108.58(11) |
| O2 S2 C14     | 107.18(11) |
| N1 S2 C14     | 106.75(10) |

| <b><u>Bond Angles</u></b> | <b><u>(degrees)</u></b> |
|---------------------------|-------------------------|
| C7 C1 C2 C3               | 69.1(3)                 |
| S1 C1 C2 C3               | -167.4(2)               |
| C1 C2 C3 C4               | -46.3(5)                |
| C2 C3 C4 C5               | 58.5(6)                 |
| C3 C4 C5 C6               | -69.2(6)                |
| C4 C5 C6 C7               | 23.1(5)                 |
| C5 C6 C7 N1               | 174.3(3)                |
| C5 C6 C7 C1               | 48.0(4)                 |
| C2 C1 C7 N1               | 148.4(2)                |
| S1 C1 C7 N1               | 27.9(2)                 |
| C2 C1 C7 C6               | -88.9(3)                |
| S1 C1 C7 C6               | 150.62(19)              |
| C13 C8 C9 C10             | -4.0(4)                 |
| N1 C8 C9 C10              | 175.4(2)                |
| C8 C9 C10 C11             | 2.3(4)                  |
| C9 C10 C11 C12            | 1.2(5)                  |
| C10 C11 C12 C13           | -2.9(5)                 |
| C9 C8 C13 C12             | 2.2(4)                  |
| N1 C8 C13 C12             | -177.2(2)               |
| C9 C8 C13 S1              | -177.47(18)             |
| N1 C8 C13 S1              | 3.1(3)                  |
| C11 C12 C13 C8            | 1.2(4)                  |
| C11 C12 C13 S1            | -179.1(2)               |
| C19 C14 C15 C16           | -1.8(4)                 |
| S2 C14 C15 C16            | 176.7(2)                |
| C14 C15 C16 C17           | 2.0(4)                  |
| C15 C16 C17 C18           | -1.2(4)                 |
| C15 C16 C17 C20           | 179.7(3)                |
| C16 C17 C18 C19           | 0.1(4)                  |
| C20 C17 C18 C19           | 179.2(3)                |
| C17 C18 C19 C14           | 0.1(4)                  |
| C15 C14 C19 C18           | 0.7(4)                  |
| S2 C14 C19 C18            | -177.79(19)             |
| C13 C8 N1 C7              | -47.7(3)                |

|               |             |
|---------------|-------------|
| C9 C8 N1 C7   | 132.8(2)    |
| C13 C8 N1 S2  | 107.9(2)    |
| C9 C8 N1 S2   | -71.5(2)    |
| C6 C7 N1 C8   | -97.3(2)    |
| C1 C7 N1 C8   | 28.3(3)     |
| C6 C7 N1 S2   | 107.28(19)  |
| C1 C7 N1 S2   | -127.07(16) |
| C8 C13 S1 C1  | 43.5(2)     |
| C12 C13 S1 C1 | -136.2(2)   |
| C2 C1 S1 C13  | 179.08(16)  |
| C7 C1 S1 C13  | -57.76(18)  |
| C8 N1 S2 O1   | 172.96(15)  |
| C7 N1 S2 O1   | -30.92(17)  |
| C8 N1 S2 O2   | 43.27(18)   |
| C7 N1 S2 O2   | -160.61(15) |
| C8 N1 S2 C14  | -71.27(18)  |
| C7 N1 S2 C14  | 84.84(17)   |
| C19 C14 S2 O1 | -166.30(18) |
| C15 C14 S2 O1 | 15.2(2)     |
| C19 C14 S2 O2 | -35.0(2)    |
| C15 C14 S2 O2 | 146.49(19)  |
| C19 C14 S2 N1 | 79.5(2)     |
| C15 C14 S2 N1 | -99.0(2)    |

### Single crystal XRD data for Compound 13

|                               |                                                                                |
|-------------------------------|--------------------------------------------------------------------------------|
| Chemical formula              | : C <sub>21</sub> H <sub>25</sub> N <sub>1</sub> O <sub>2</sub> S <sub>2</sub> |
| Formula weight                | : 387.54                                                                       |
| Symmetry cell setting         | : Monoclinic                                                                   |
| Symmetry space group name H-M | : 'P 21/n'                                                                     |
| Z                             | : 4                                                                            |
| a (Å)                         | : 8.2666(3)                                                                    |
| b (Å)                         | : 13.1054(4)                                                                   |
| c (Å)                         | : 18.5231(7)                                                                   |
| α (°)                         | : 90.00                                                                        |
| β (°)                         | : 95.842(2)                                                                    |
| γ (°)                         | : 90.00                                                                        |
| Cell volume                   | : 1996.32(12) Å <sup>3</sup>                                                   |
| Temperature                   | : 298(2) K                                                                     |

Exptl crystal description : Block  
Exptl crystal colour : colourless  
Exptl absorpt correction type : Multi-scan  
Exptl absorpt process details : SADABS (Bruker, 1999)  
Crystal size max : 0.35  
Exptl crystal size mid : 0.29  
Exptl crystal size min : 0.22  
Diffn measurement device type : Bruker Apex II CCD area detector  
Diffn measurement method : phi and omega scans  
Computing data collection : APEX II, Bruker, 2004  
Computing cell refinement : APEXII/SAINT (Bruker, 2004)  
Computing data reduction : SAINT/XPREP (Bruker, 2004)  
Computing molecular graphics : ORTEP3 (Farrugia, 1997) and Mercury (Bruno et al., 2002)  
Computing publication material : SHELXL-97 (Sheldrick, 1997)  
Crystal F(000) : 824  
Absorpt coefficient : 0.282  
Absorpt correction T min : 0.9079  
Absorpt correction T max : 0.9406  
Absorpt process details : (SADABS, 1999)  
Radiation wavelength : 0.71073  
Radiation type : MoK $\alpha$   
Radiation source : fine-focus sealed tube  
Radiation monochromator : graphite  
Measurement device type : Bruker axs kappa apex2 CCD diffractometer  
Reflns number : 14669  
Reflns R equivalents : 0.0398  
Reflns av sigmaI/netI : 0.0621  
Refine ls hydrogen treatment : constr  
Reflns total number : 4765  
Reflns gt number : 2501  
Reflns threshold expression :  $>2\sigma(I)$   
Refine ls number reflns : 4765

Refine ls number parameters : 236  
Refine ls number restraints : 0  
Refine ls R factor all : 0.1179  
Refine ls wR factor : 0.1397

| <b><u>Bond length</u></b> | <b><u>angstroms</u></b> |
|---------------------------|-------------------------|
| C1 C6                     | 1.388(4)                |
| C1 C2                     | 1.398(4)                |
| C1 S2                     | 1.748(3)                |
| C2 C3                     | 1.384(5)                |
| C2 H2                     | 0.9300                  |
| C3 C4                     | 1.357(5)                |
| C3 H3                     | 0.9300                  |
| C4 C5                     | 1.367(4)                |
| C4 H4                     | 0.9300                  |
| C5 C6                     | 1.395(3)                |
| C5 H5                     | 0.9300                  |
| C6 N1                     | 1.429(3)                |
| C7 N1                     | 1.480(3)                |
| C7 C8                     | 1.523(3)                |
| C7 C14                    | 1.543(3)                |
| C7 H7                     | 0.9800                  |
| C8 C9                     | 1.527(4)                |
| C8 H8A                    | 0.9700                  |
| C8 H8B                    | 0.9700                  |
| C9 C10                    | 1.531(4)                |
| C9 H9A                    | 0.9700                  |
| C9 H9B                    | 0.9700                  |
| C10 C11                   | 1.520(5)                |
| C10 H10A                  | 0.9700                  |
| C10 H10B                  | 0.9700                  |
| C11 C12                   | 1.503(5)                |
| C11 H11A                  | 0.9700                  |
| C11 H11B                  | 0.9700                  |
| C12 C13                   | 1.515(4)                |
| C12 H12A                  | 0.9700                  |
| C12 H12B                  | 0.9700                  |
| C13 C14                   | 1.527(3)                |
| C13 H13A                  | 0.9700                  |
| C13 H13B                  | 0.9700                  |
| C14 S2                    | 1.818(3)                |
| C14 H14                   | 0.9800                  |

|          |            |
|----------|------------|
| C15 C20  | 1.370(3)   |
| C15 C16  | 1.383(4)   |
| C15 S1   | 1.763(2)   |
| C16 C17  | 1.371(4)   |
| C16 H16  | 0.9300     |
| C17 C18  | 1.375(4)   |
| C17 H17  | 0.9300     |
| C18 C19  | 1.378(4)   |
| C18 C21  | 1.516(4)   |
| C19 C20  | 1.388(3)   |
| C19 H19  | 0.9300     |
| C20 H20  | 0.9300     |
| C21 H21A | 0.9600     |
| C21 H21B | 0.9600     |
| C21 H21C | 0.9600     |
| N1 S1    | 1.6315(19) |
| O1 S1    | 1.4259(18) |
| O2 S1    | 1.4270(18) |

**Bond Angles**                      **(degrees)**

|           |            |
|-----------|------------|
| C6 C1 C2  | 119.5(3)   |
| C6 C1 S2  | 118.24(19) |
| C2 C1 S2  | 122.3(2)   |
| C3 C2 C1  | 118.5(3)   |
| C3 C2 H2  | 120.7      |
| C1 C2 H2  | 120.7      |
| C4 C3 C2  | 121.9(3)   |
| C4 C3 H3  | 119.0      |
| C2 C3 H3  | 119.1      |
| C3 C4 C5  | 120.2(3)   |
| C3 C4 H4  | 119.9      |
| C5 C4 H4  | 119.9      |
| C4 C5 C6  | 119.8(3)   |
| C4 C5 H5  | 120.1      |
| C6 C5 H5  | 120.1      |
| C1 C6 C5  | 120.1(2)   |
| C1 C6 N1  | 118.4(2)   |
| C5 C6 N1  | 121.5(2)   |
| N1 C7 C8  | 107.03(19) |
| N1 C7 C14 | 114.2(2)   |
| C8 C7 C14 | 112.7(2)   |
| N1 C7 H7  | 107.5      |
| C8 C7 H7  | 107.5      |
| C14 C7 H7 | 107.5      |
| C7 C8 C9  | 116.5(2)   |
| C7 C8 H8A | 108.2      |

|               |            |
|---------------|------------|
| C9 C8 H8A     | 108.2      |
| C7 C8 H8B     | 108.2      |
| C9 C8 H8B     | 108.2      |
| H8A C8 H8B    | 107.3      |
| C8 C9 C10     | 116.0(3)   |
| C8 C9 H9A     | 108.3      |
| C10 C9 H9A    | 108.3      |
| C8 C9 H9B     | 108.3      |
| C10 C9 H9B    | 108.3      |
| H9A C9 H9B    | 107.4      |
| C11 C10 C9    | 117.9(3)   |
| C11 C10 H10A  | 107.8      |
| C9 C10 H10A   | 107.8      |
| C11 C10 H10B  | 107.8      |
| C9 C10 H10B   | 107.8      |
| H10A C10 H10B | 107.2      |
| C12 C11 C10   | 116.1(3)   |
| C12 C11 H11A  | 108.3      |
| C10 C11 H11A  | 108.3      |
| C12 C11 H11B  | 108.3      |
| C10 C11 H11B  | 108.3      |
| H11A C11 H11B | 107.4      |
| C11 C12 C13   | 117.8(3)   |
| C11 C12 H12A  | 107.8      |
| C13 C12 H12A  | 107.8      |
| C11 C12 H12B  | 107.8      |
| C13 C12 H12B  | 107.8      |
| H12A C12 H12B | 107.2      |
| C12 C13 C14   | 118.6(3)   |
| C12 C13 H13A  | 107.7      |
| C14 C13 H13A  | 107.7      |
| C12 C13 H13B  | 107.7      |
| C14 C13 H13B  | 107.7      |
| H13A C13 H13B | 107.1      |
| C13 C14 C7    | 113.1(2)   |
| C13 C14 S2    | 104.76(19) |
| C7 C14 S2     | 113.29(18) |
| C13 C14 H14   | 108.5      |
| C7 C14 H14    | 108.5      |
| S2 C14 H14    | 108.5      |
| C20 C15 C16   | 120.0(2)   |
| C20 C15 S1    | 120.8(2)   |
| C16 C15 S1    | 119.14(19) |
| C17 C16 C15   | 119.5(3)   |
| C17 C16 H16   | 120.3      |
| C15 C16 H16   | 120.3      |
| C16 C17 C18   | 121.9(3)   |
| C16 C17 H17   | 119.1      |

|               |            |
|---------------|------------|
| C18 C17 H17   | 119.1      |
| C17 C18 C19   | 117.8(3)   |
| C17 C18 C21   | 121.4(3)   |
| C19 C18 C21   | 120.8(3)   |
| C18 C19 C20   | 121.4(3)   |
| C18 C19 H19   | 119.3      |
| C20 C19 H19   | 119.3      |
| C15 C20 C19   | 119.3(3)   |
| C15 C20 H20   | 120.3      |
| C19 C20 H20   | 120.3      |
| C18 C21 H21A  | 109.5      |
| C18 C21 H21B  | 109.5      |
| H21A C21 H21B | 109.5      |
| C18 C21 H21C  | 109.5      |
| H21A C21 H21C | 109.5      |
| H21B C21 H21C | 109.5      |
| C6 N1 C7      | 119.11(18) |
| C6 N1 S1      | 119.81(16) |
| C7 N1 S1      | 118.50(15) |
| O1 S1 O2      | 120.18(12) |
| O1 S1 N1      | 106.95(10) |
| O2 S1 N1      | 106.25(11) |
| O1 S1 C15     | 107.20(12) |
| O2 S1 C15     | 107.01(11) |
| N1 S1 C15     | 108.89(10) |
| C1 S2 C14     | 99.02(12)  |

**Bond Angles**                      **(degrees)**

|                 |            |
|-----------------|------------|
| C6 C1 C2 C3     | 0.0(4)     |
| S2 C1 C2 C3     | 179.9(2)   |
| C1 C2 C3 C4     | 2.5(5)     |
| C2 C3 C4 C5     | -2.6(5)    |
| C3 C4 C5 C6     | 0.2(5)     |
| C2 C1 C6 C5     | -2.3(4)    |
| S2 C1 C6 C5     | 177.81(19) |
| C2 C1 C6 N1     | 178.9(2)   |
| S2 C1 C6 N1     | -1.0(3)    |
| C4 C5 C6 C1     | 2.2(4)     |
| C4 C5 C6 N1     | -179.0(2)  |
| N1 C7 C8 C9     | -176.3(2)  |
| C14 C7 C8 C9    | -49.9(3)   |
| C7 C8 C9 C10    | -61.2(4)   |
| C8 C9 C10 C11   | 66.9(5)    |
| C9 C10 C11 C12  | 39.5(5)    |
| C10 C11 C12 C13 | -97.9(4)   |
| C11 C12 C13 C14 | 64.9(4)    |
| C12 C13 C14 C7  | -64.9(3)   |



|                 |             |
|-----------------|-------------|
| C12 C13 C14 S2  | 171.2(2)    |
| N1 C7 C14 C13   | -132.6(2)   |
| C8 C7 C14 C13   | 105.0(3)    |
| N1 C7 C14 S2    | -13.6(2)    |
| C8 C7 C14 S2    | -136.0(2)   |
| C20 C15 C16 C17 | 1.0(4)      |
| S1 C15 C16 C17  | -177.0(2)   |
| C15 C16 C17 C18 | 0.7(5)      |
| C16 C17 C18 C19 | -1.8(5)     |
| C16 C17 C18 C21 | 176.9(3)    |
| C17 C18 C19 C20 | 1.2(4)      |
| C21 C18 C19 C20 | -177.4(3)   |
| C16 C15 C20 C19 | -1.5(4)     |
| S1 C15 C20 C19  | 176.4(2)    |
| C18 C19 C20 C15 | 0.4(4)      |
| C1 C6 N1 C7     | 51.5(3)     |
| C5 C6 N1 C7     | -127.3(2)   |
| C1 C6 N1 S1     | -110.0(2)   |
| C5 C6 N1 S1     | 71.2(3)     |
| C8 C7 N1 C6     | 84.6(2)     |
| C14 C7 N1 C6    | -40.9(3)    |
| C8 C7 N1 S1     | -113.6(2)   |
| C14 C7 N1 S1    | 120.90(19)  |
| C6 N1 S1 O1     | -37.7(2)    |
| C7 N1 S1 O1     | 160.64(17)  |
| C6 N1 S1 O2     | -167.25(17) |
| C7 N1 S1 O2     | 31.13(19)   |
| C6 N1 S1 C15    | 77.80(19)   |
| C7 N1 S1 C15    | -83.82(19)  |
| C20 C15 S1 O1   | -156.8(2)   |
| C16 C15 S1 O1   | 21.2(2)     |
| C20 C15 S1 O2   | -26.6(2)    |
| C16 C15 S1 O2   | 151.3(2)    |
| C20 C15 S1 N1   | 87.9(2)     |
| C16 C15 S1 N1   | -94.2(2)    |
| C6 C1 S2 C14    | -43.5(2)    |
| C2 C1 S2 C14    | 136.6(2)    |
| C13 C14 S2 C1   | 172.80(18)  |
| C7 C14 S2 C1    | 49.13(19)   |
